# Supplementary material for: Ion-pairing assemblies of anion-responsive helical PtII complexes
Source: Royal Society of Chemistry journal article supplement (doi:10.1039/d4qo01697a), 2024-01-01
Supplement: d4qo01697a1.pdf [file d4qo01697a1.pdf]

## Electronic Supplementary Information

### Ion-pairing assemblies of anion-responsive helical Pt<sup>II</sup> complexes

Yohei Haketa, Maho Kawami, Wataru Ota, Tohru Sato and Hiromitsu Maeda\*

*Department of Applied Chemistry, College of Life Sciences, Ritsumeikan University, Kusatsu 525–8577, Japan, Fax: +81 77 561 2659; Tel: +81 77 561 5969; E-mail: maedahir@ph.ritsumei.ac.jp, Fukui Institute for Fundamental Chemistry, Kyoto University, Kyoto 606–8103, Japan and Department of Molecular Engineering, Graduate School of Engineering, Kyoto University, Kyoto 615–8510, Japan*

#### Table of Contents

|                                                                                               |     |
|-----------------------------------------------------------------------------------------------|-----|
| <b>1. Spectroscopic data</b>                                                                  | S2  |
| <b>Fig. S1–3</b> <sup>1</sup> H and <sup>13</sup> C NMR spectra.                              | S2  |
| <b>Fig. S4</b> UV/vis absorption spectra.                                                     | S5  |
| <b>Fig. S5</b> Emission spectra.                                                              | S5  |
| <b>Fig. S6</b> Chiral HPLC profiles.                                                          | S6  |
| <b>Fig. S7</b> CD spectra.                                                                    | S6  |
| <b>2. X-ray crystallographic data</b>                                                         | S7  |
| <b>Fig. S8–11</b> Ortep drawings.                                                             | S7  |
| <b>Fig. S12–15</b> Packing diagrams.                                                          | S9  |
| <b>Fig. S16–18</b> Hirshfeld surfaces.                                                        | S12 |
| <b>3. Theoretical studies</b>                                                                 | S14 |
| <b>Fig. S19–21</b> Optimized structures.                                                      | S14 |
| <b>Fig. S22–27</b> Molecular orbitals and theoretical UV/vis absorption spectra.              | S17 |
| <b>Fig. S28</b> Electrostatic potential (ESP) mapping.                                        | S21 |
| <b>Fig. S29</b> Calculated CD spectra.                                                        | S21 |
| <b>Fig. S30–32</b> EDA calculations.                                                          | S22 |
| <b>Fig. S33</b> Theoretical studies for luminescence property.                                | S23 |
| Cartesian coordination of optimized structures                                                | S23 |
| <b>4. Anion-binding behaviors</b>                                                             | S42 |
| <b>Fig. S34–36</b> UV/vis absorption spectral changes and corresponding titration plots.      | S42 |
| <b>Fig. S37</b> CD spectral changes upon the addition of Cl <sup>−</sup> .                    | S43 |
| <b>Fig. S38–40</b> <sup>1</sup> H NMR spectral changes upon the addition of Cl <sup>−</sup> . | S44 |

# 1. Spectroscopic data

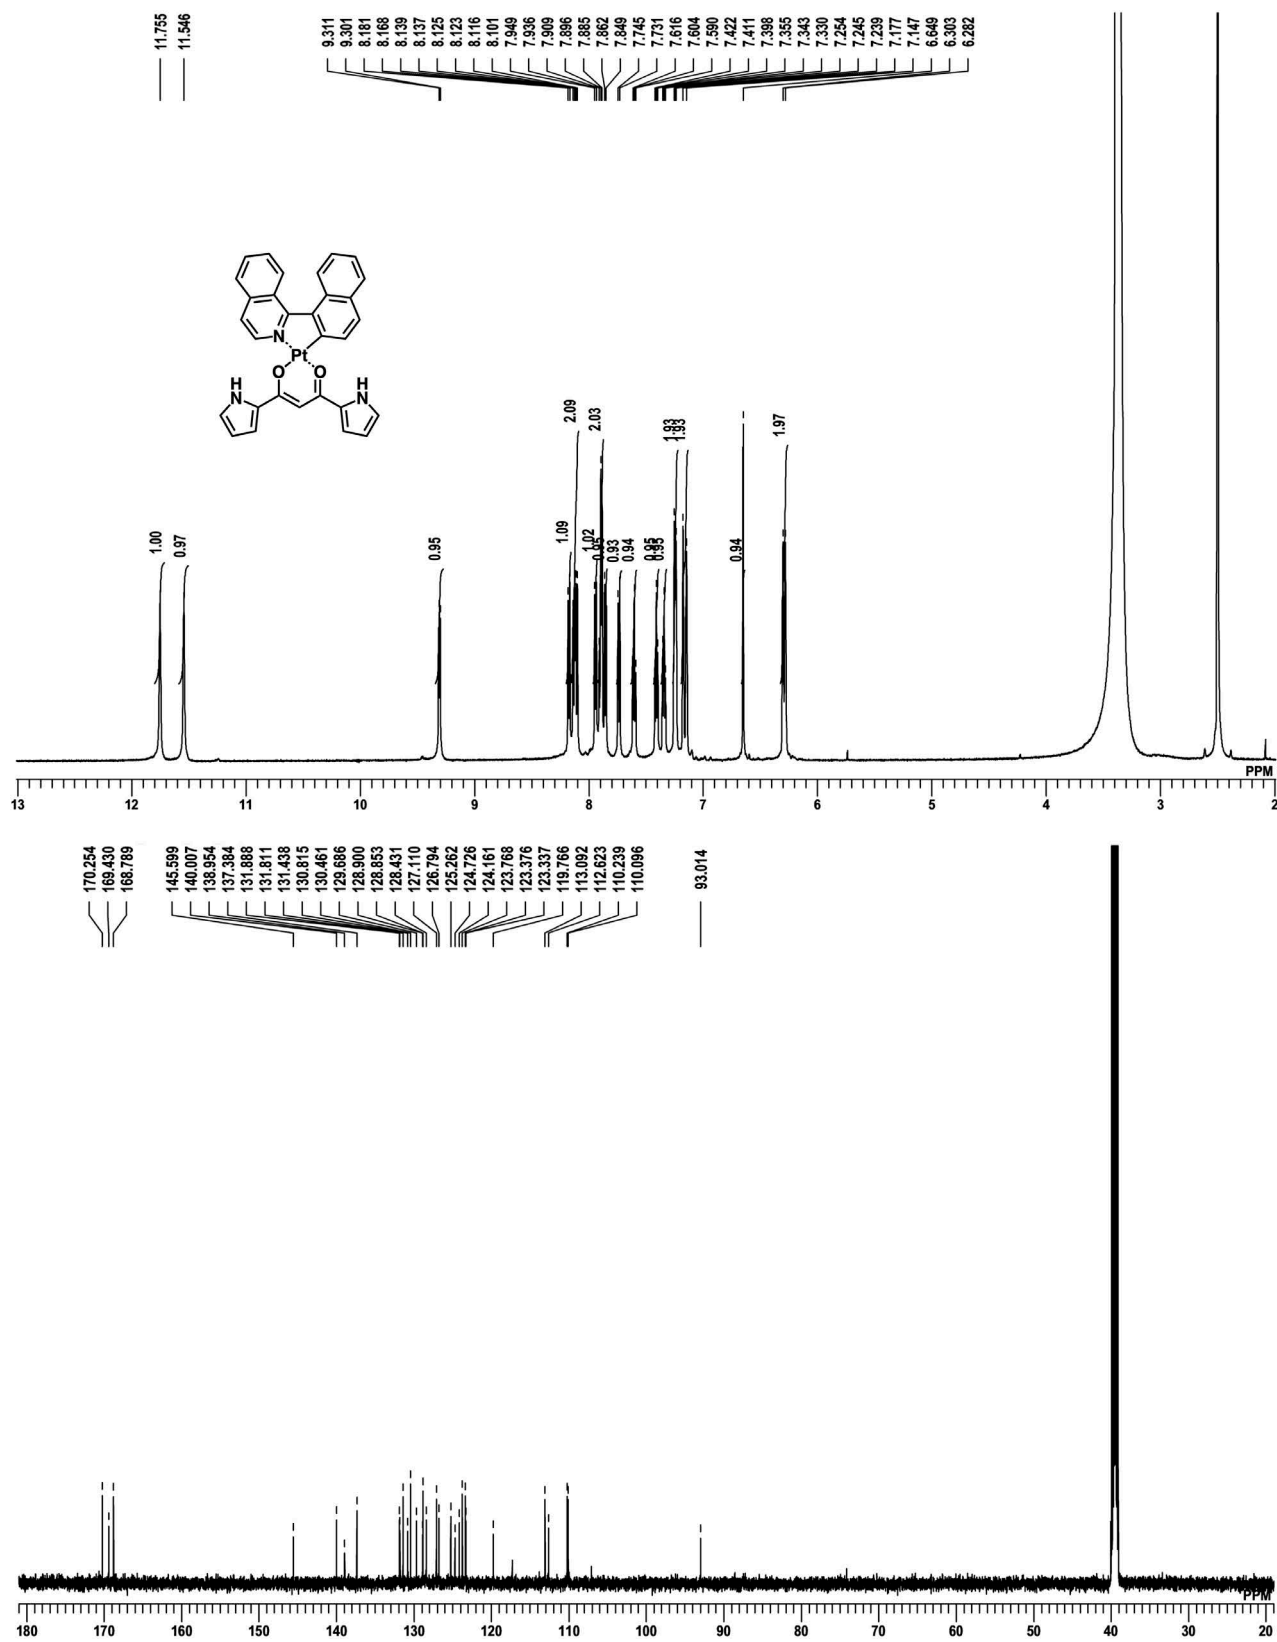

Fig. S1  $^1\text{H}$  NMR (top) and  $^{13}\text{C}\{^1\text{H}\}$  NMR (bottom) spectra of **2a** in  $\text{DMSO-}d_6$ .

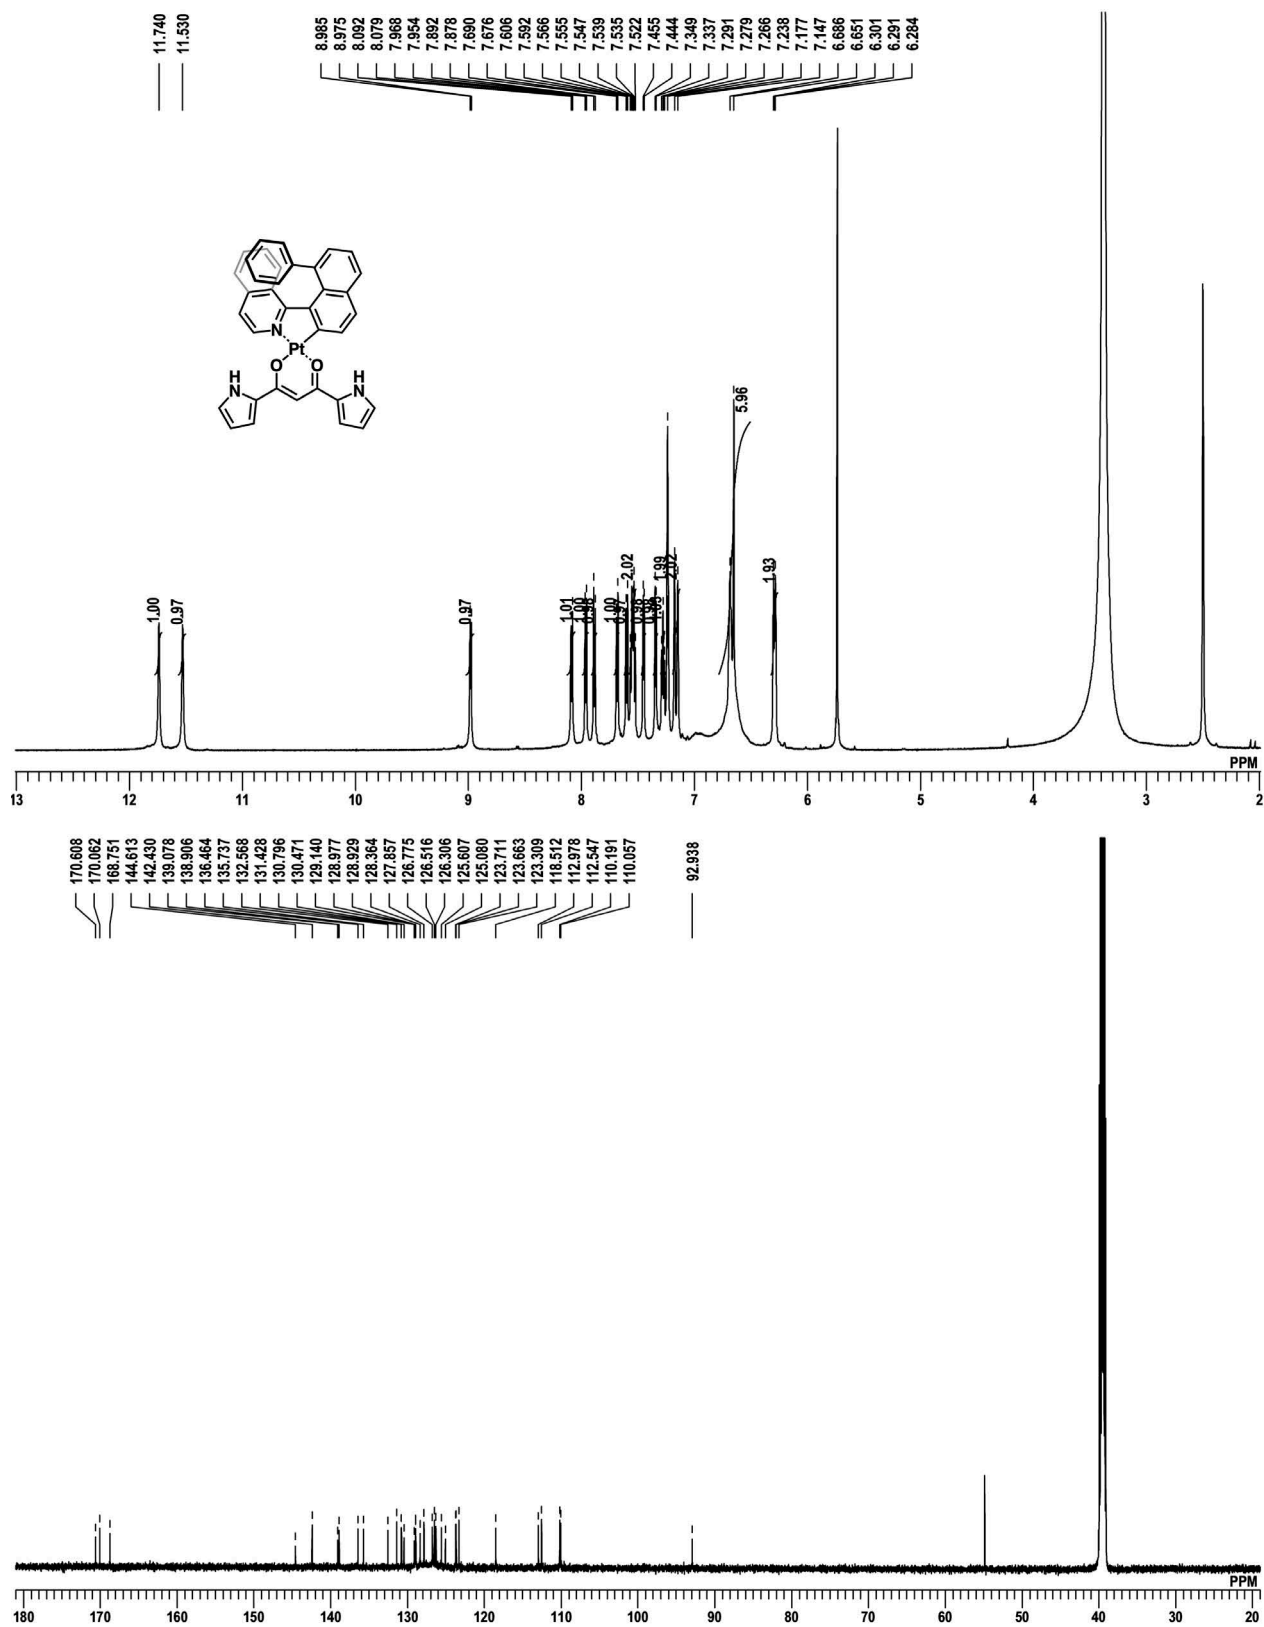

Fig. S2 <sup>1</sup>H NMR (top) and <sup>13</sup>C{<sup>1</sup>H} NMR (bottom) spectra of **3a** in DMSO-*d*<sub>6</sub>.

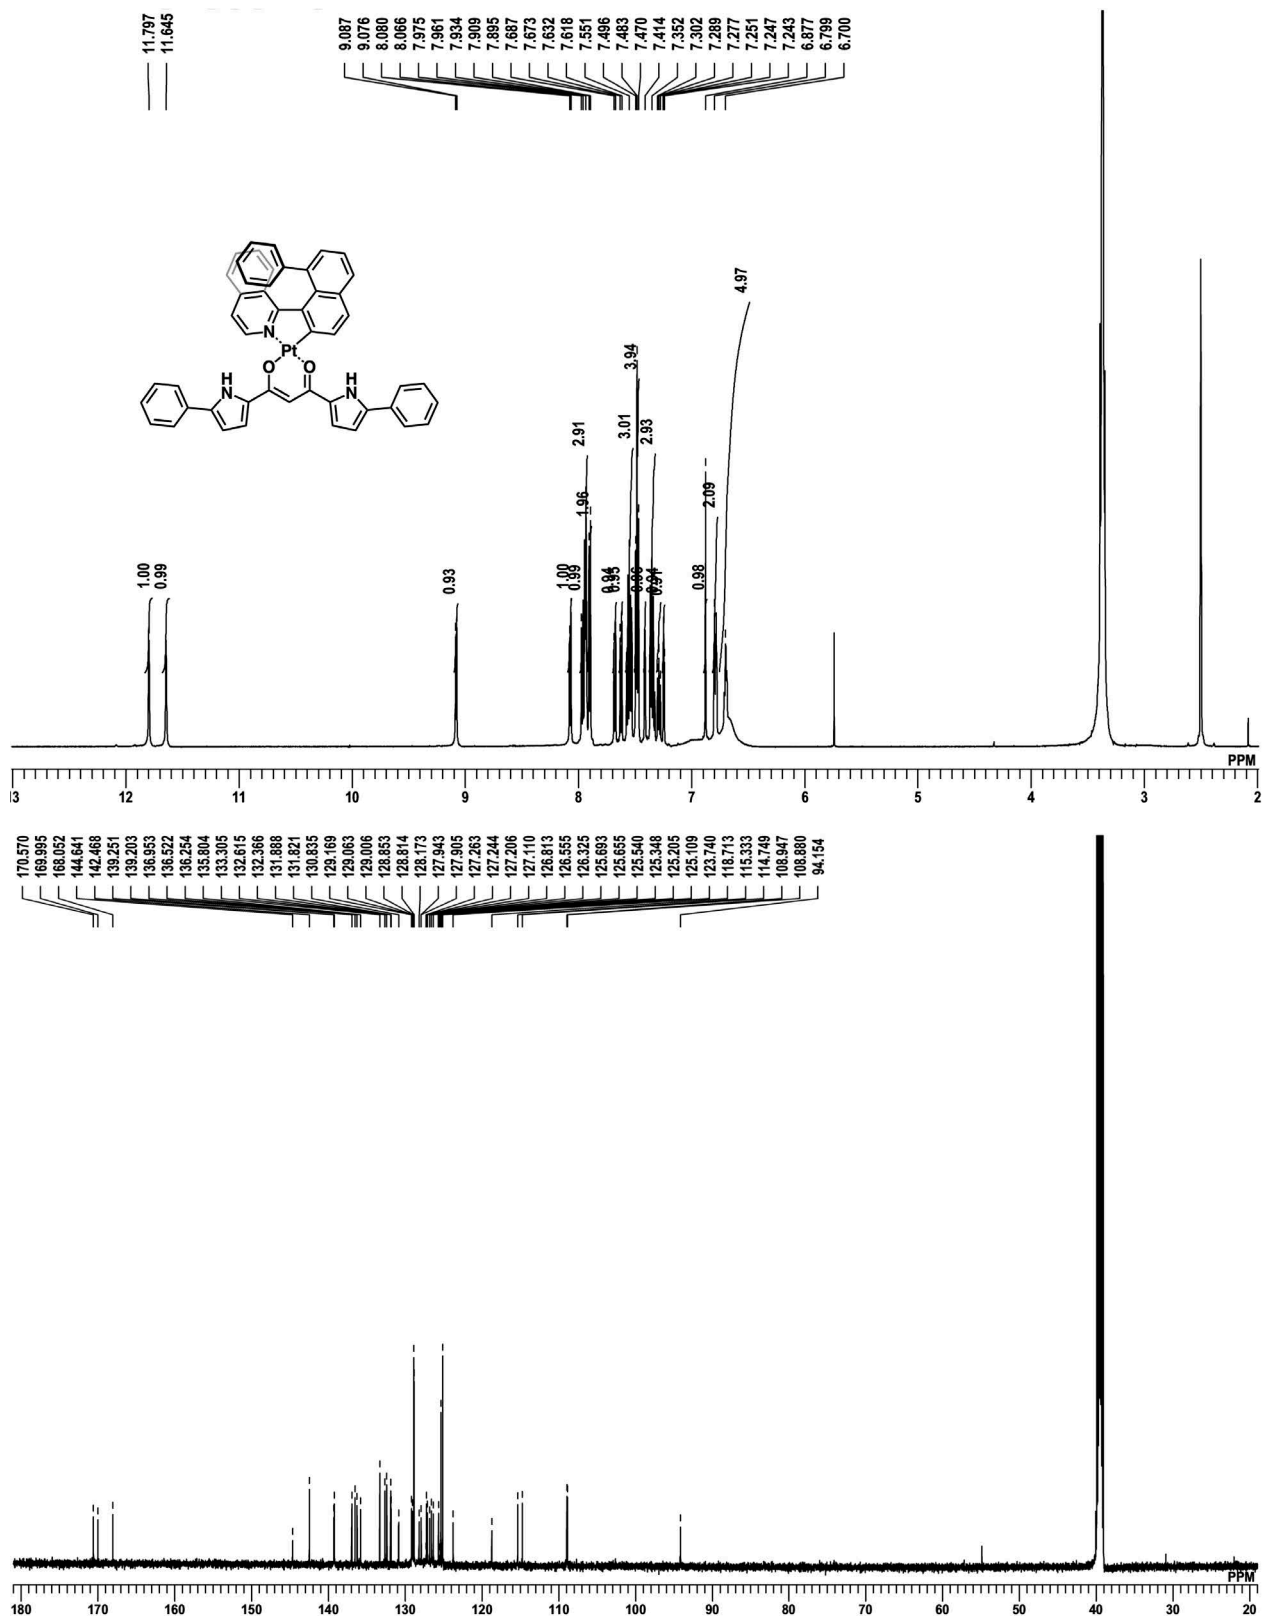

Fig. S3 <sup>1</sup>H NMR (top) and <sup>13</sup>C{<sup>1</sup>H} NMR (bottom) spectra of **3b** in DMSO-*d*<sub>6</sub>.



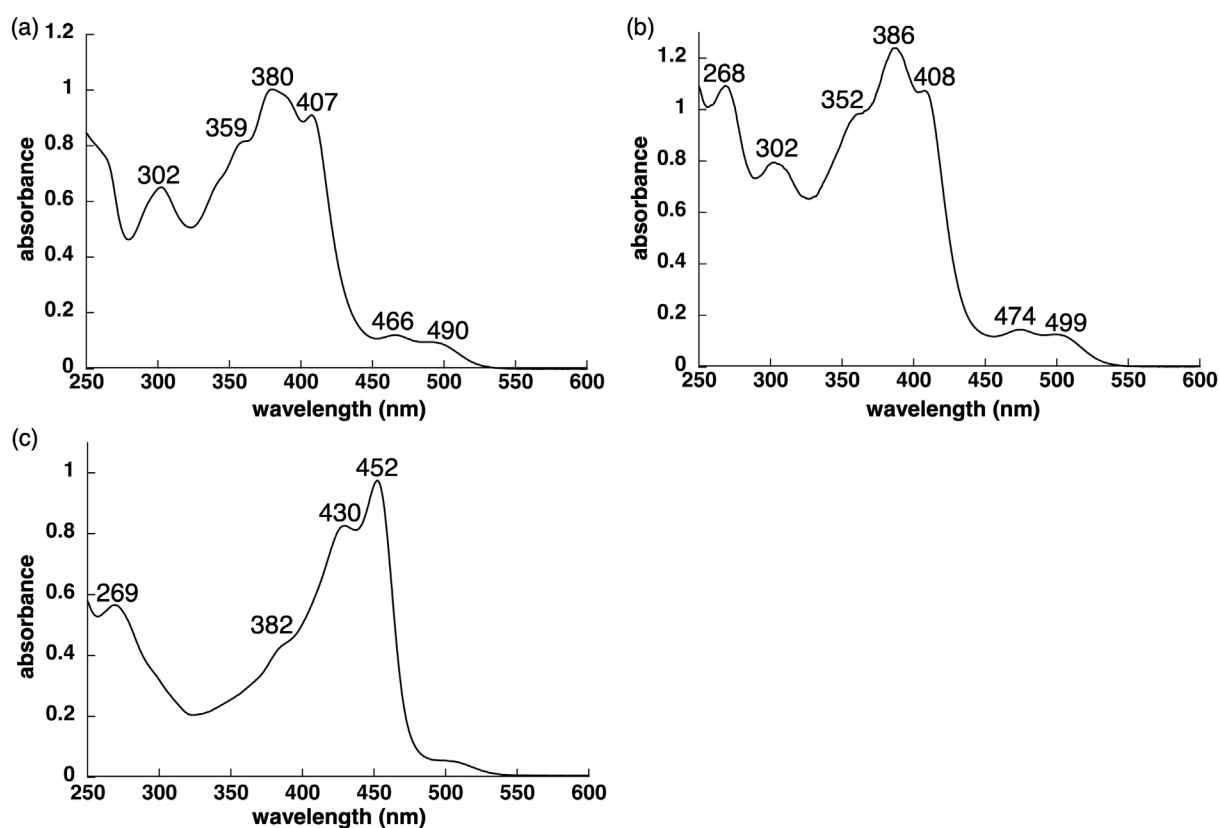

**Fig. S4** UV/vis absorption spectra of (a) **2a** (0.03 mM), (b) **3a** (0.03 mM), and (c) **3b** (0.015 mM) in  $\text{CH}_2\text{Cl}_2$ .

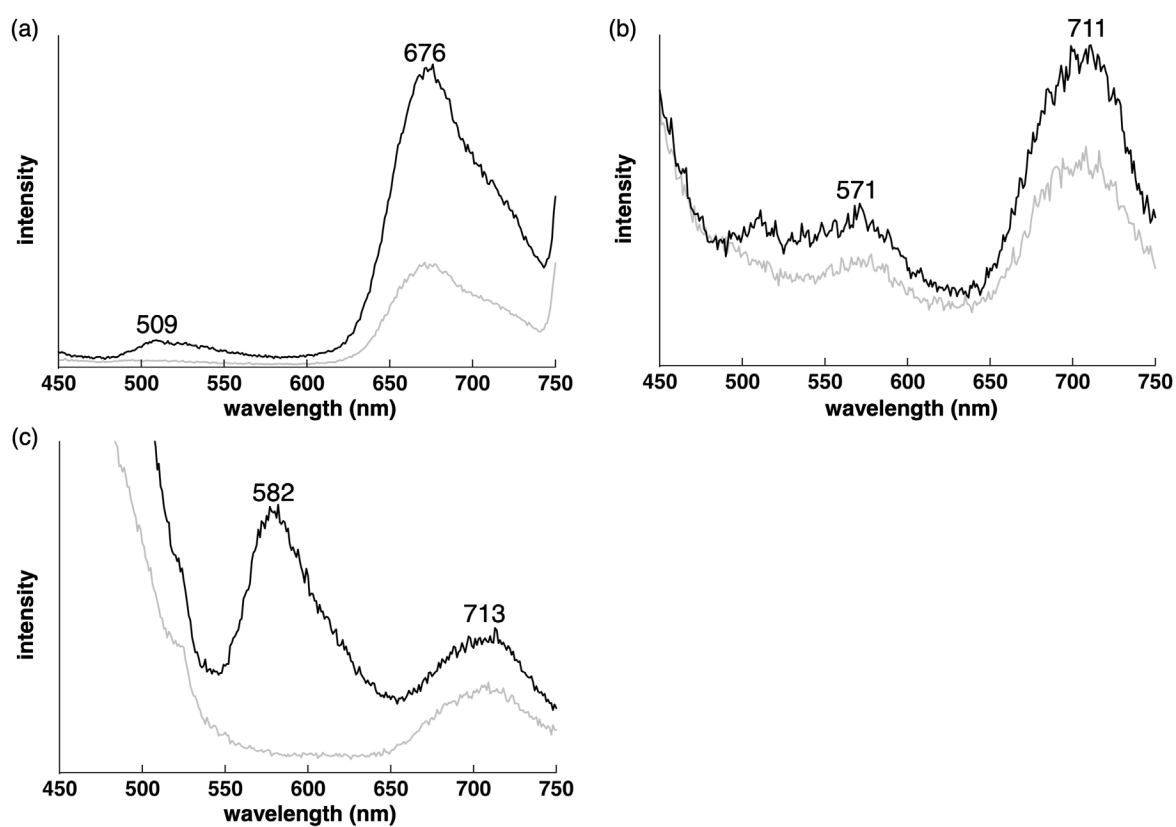

**Fig. S5** Emission spectra of (a) **2a** ( $\lambda_{\text{ex}} = 380$  nm), (b) **3a** ( $\lambda_{\text{ex}} = 387$  nm), and (c) **3b** ( $\lambda_{\text{ex}} = 452$  nm) in deoxygenated  $\text{CH}_2\text{Cl}_2$  (black) and non-deoxygenated  $\text{CH}_2\text{Cl}_2$  (gray) (0.03 mM) at r.t. Emission quantum yields ( $\Phi_{\text{em}}$ ) of **2a** and **3a** in deoxygenated  $\text{CH}_2\text{Cl}_2$  at 20 °C were 1.1% and 0.5%, respectively, whereas  $\Phi_{\text{em}}$  of **3b** was too low to determine.

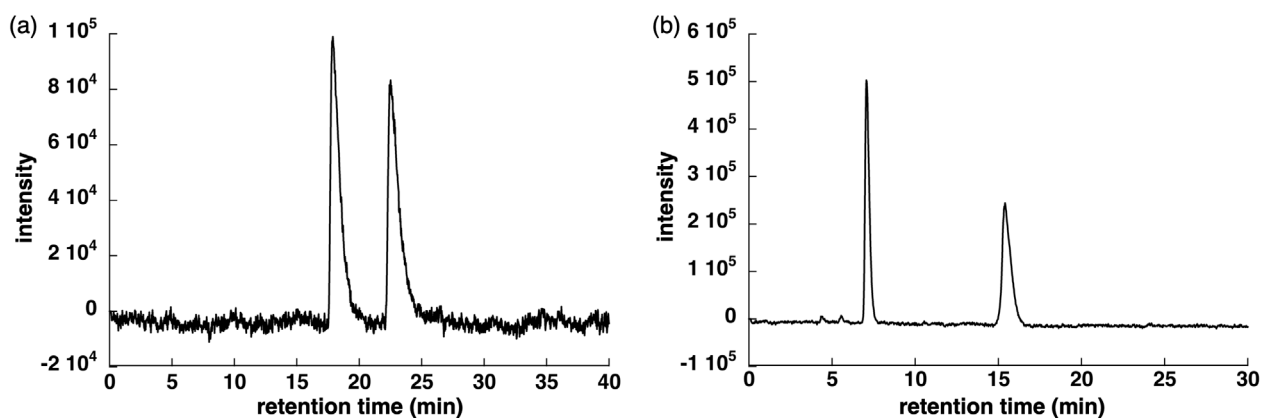

**Fig. S6** Chiral HPLC profiles of dipyrrolyldiketone Pt<sup>II</sup> complexes (Daicel CHIRALPAK IA, flow rate: 1.0 mL/min): (a) **3a** using CH<sub>2</sub>Cl<sub>2</sub>/*n*-hexane (1:1) as an eluent (monitored at 386 nm) and (b) **3b** using CH<sub>2</sub>Cl<sub>2</sub>/*n*-hexane (5:1) as an eluent (monitored at 452 nm).

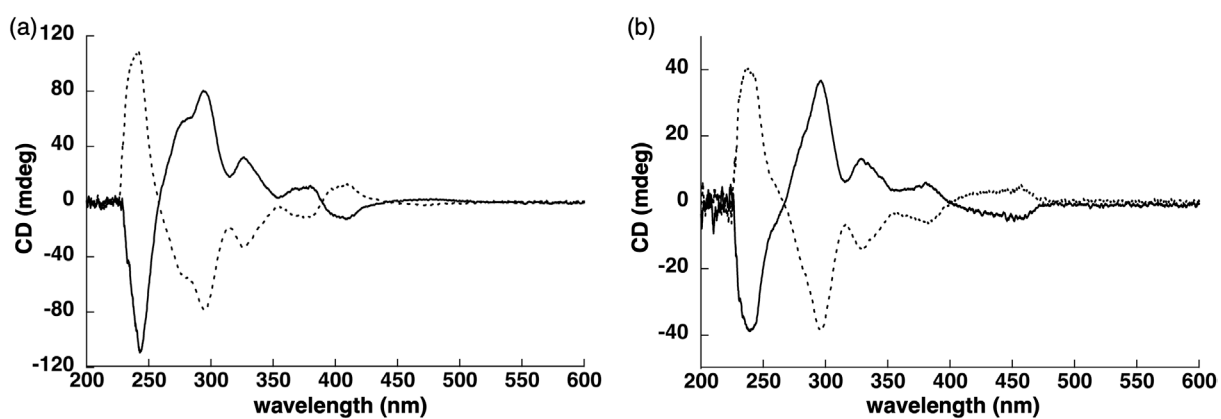

**Fig. S7** CD spectra of (a) **3a** and (b) **3b** in CH<sub>2</sub>Cl<sub>2</sub> (0.03 and 0.015 mM, respectively) after the separation of enantiomers. In (a), the solid and dotted lines correspond to the first and second fractions, respectively, whereas, in (b), dotted and solid lines correspond to the first and second fractions, respectively, in chiral HPLC separation (Fig. S6). Theoretical calculations for the CD spectra suggested that, in both Pt<sup>II</sup> complexes, the solid and dotted lines are ascribable to *P*-type and *M*-type helices, respectively (Fig. S29).

## 2. X-ray crystallographic data

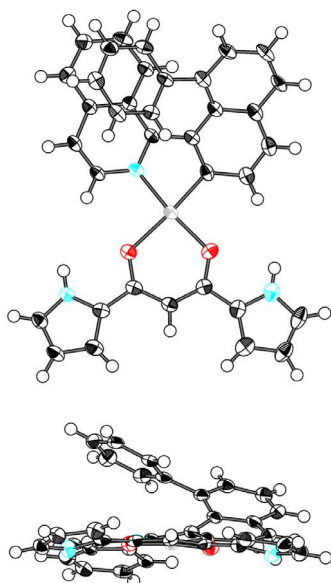

**Fig. S8** Ortep drawings of single-crystal X-ray structure (top and side views) of **3a** in the form of the *P*-type helix as a representative. Thermal ellipsoids are scaled to the 50% probability level. Solvent molecules are omitted for clarity. Atom color code: black, white (sphere), blue, red, and gray refer to carbon, hydrogen, nitrogen, oxygen, and platinum, respectively.

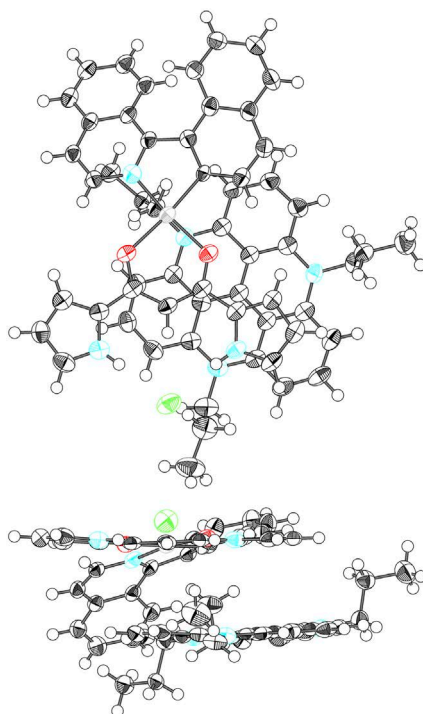

**Fig. S9** Ortep drawings of single-crystal X-ray structure (top and side views) of **2a**·Cl<sup>-</sup>-TATA<sup>+</sup> in the form of the *P*-type helix as a representative. Thermal ellipsoids are scaled to the 50% probability level. Atom color code: black, white (sphere), blue, red, yellow green, and gray refer to carbon, hydrogen, nitrogen, oxygen, chlorine, and platinum, respectively.

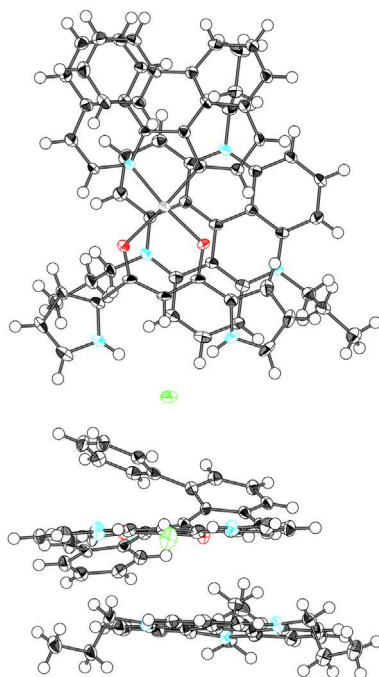

**Fig. S10** Ortep drawings of single-crystal X-ray structure (top and side views) of **3a**·Cl<sup>-</sup>-TATA<sup>+</sup> in the form of the *P*-type helix as a representative. Thermal ellipsoids are scaled to the 50% probability level. Solvent molecules are omitted for clarity. Atom color code: black, white (sphere), blue, red, yellow green, and gray refer to carbon, hydrogen, nitrogen, oxygen, chlorine, and platinum, respectively.

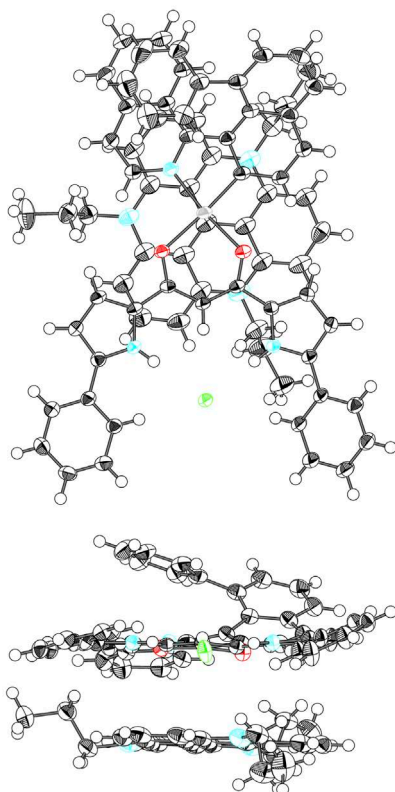

**Fig. S11** Ortep drawings of single-crystal X-ray structure (top and side views) of **3b**·Cl<sup>-</sup>-TATA<sup>+</sup> in the form of the *P*-type helix as a representative. Thermal ellipsoids are scaled to the 50% probability level. Solvent molecules are omitted for clarity. Atom color code: black, white (sphere), blue, red, yellow green, and gray refer to carbon, hydrogen, nitrogen, oxygen, chlorine, and platinum, respectively.

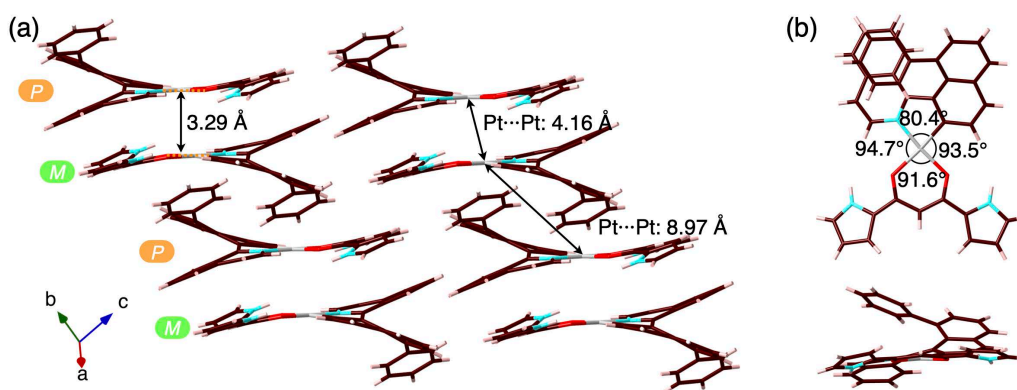

**Fig. S12** Packing diagrams of **3a**: (a) side view of the packing structure and (b) enlarged top and side views of the constituting monomer. The distance between two **3a** mean planes (core five atoms of OOPtNC) is 3.29 Å with the Pt...Pt distances of 8.97 and 4.16 Å. The stacked dimer of **3a** is composed of the *P*- and *M*-type helices. The angles around Pt are 80.4°, 93.5°, 91.6°, and 94.7°. The  $\tau_4$  value,<sup>[S1]</sup> which serves as a geometry index for the four-coordinate Pt complex, is 0.09, suggesting an almost square planar structure. The colors orange and green in (a) represent *P*- and *M*-helical enantiomers, respectively. Atom color code: brown, pink, blue, red, and gray refer to carbon, hydrogen, nitrogen, oxygen, and platinum, respectively.

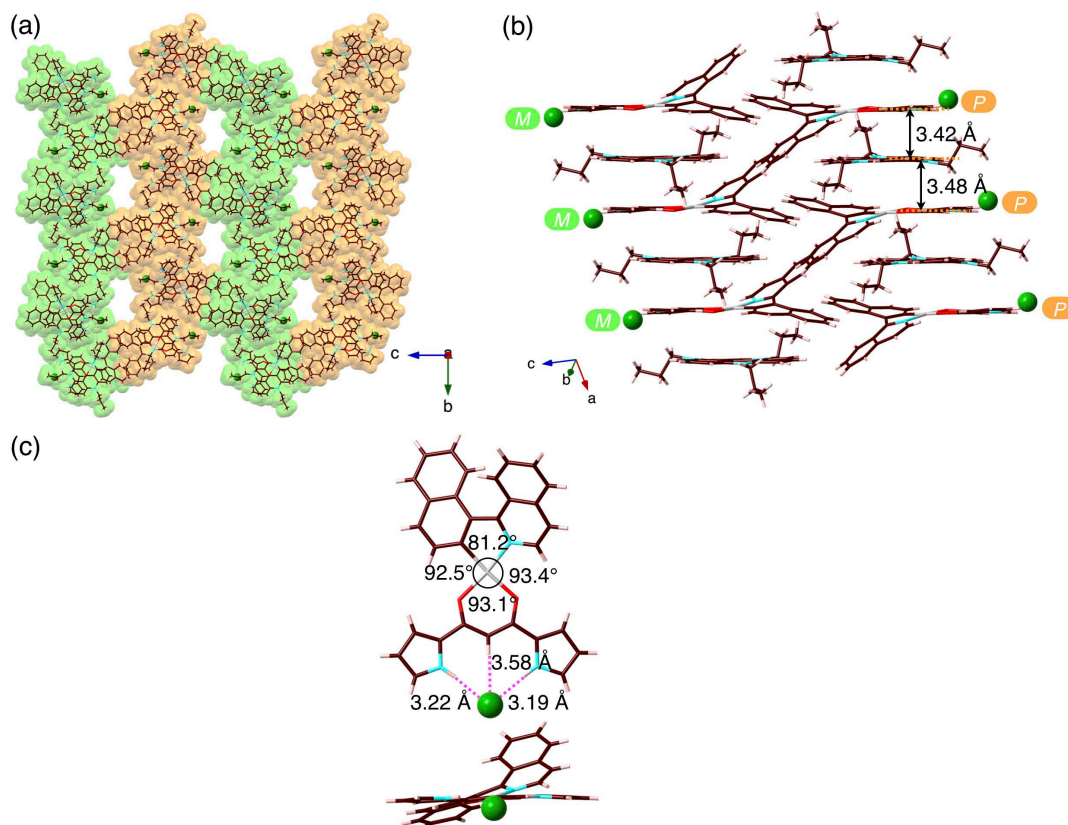

**Fig. S13** Packing diagrams of **2a**·Cl<sup>-</sup>-TATA<sup>+</sup>: (a) top view of the charge-by-charge assembly, (b) side view of the charge-by-charge columnar structure, and (c) top and side views of **2a**·Cl<sup>-</sup>. The distances between the TATA<sup>+</sup> mean planes (core 22 atoms) and the dipyrrolyldiketone Pt<sup>II</sup> complex units with Cl<sup>-</sup> (17 atoms) are 3.42 and 3.48 Å. Each charge-by-charge column is composed of either of the enantiomers. The N(-H)···Cl<sup>-</sup> and C<sub>bridging</sub>(-H)···Cl<sup>-</sup> hydrogen-bonding distances are 3.19/3.22 and 3.58 Å, respectively. The  $\tau_4$  value,<sup>[S1]</sup> which serves as geometry indices for the four-coordinate Pt complex, is 0.11, suggesting almost square planar structures. The colors orange and green in (a) represent *P*- and *M*-helical enantiomers, respectively. Atom color code: brown, pink, cyan, red, yellow green (spherical), and gray refer to carbon, hydrogen, nitrogen, oxygen, chlorine, and platinum, respectively.

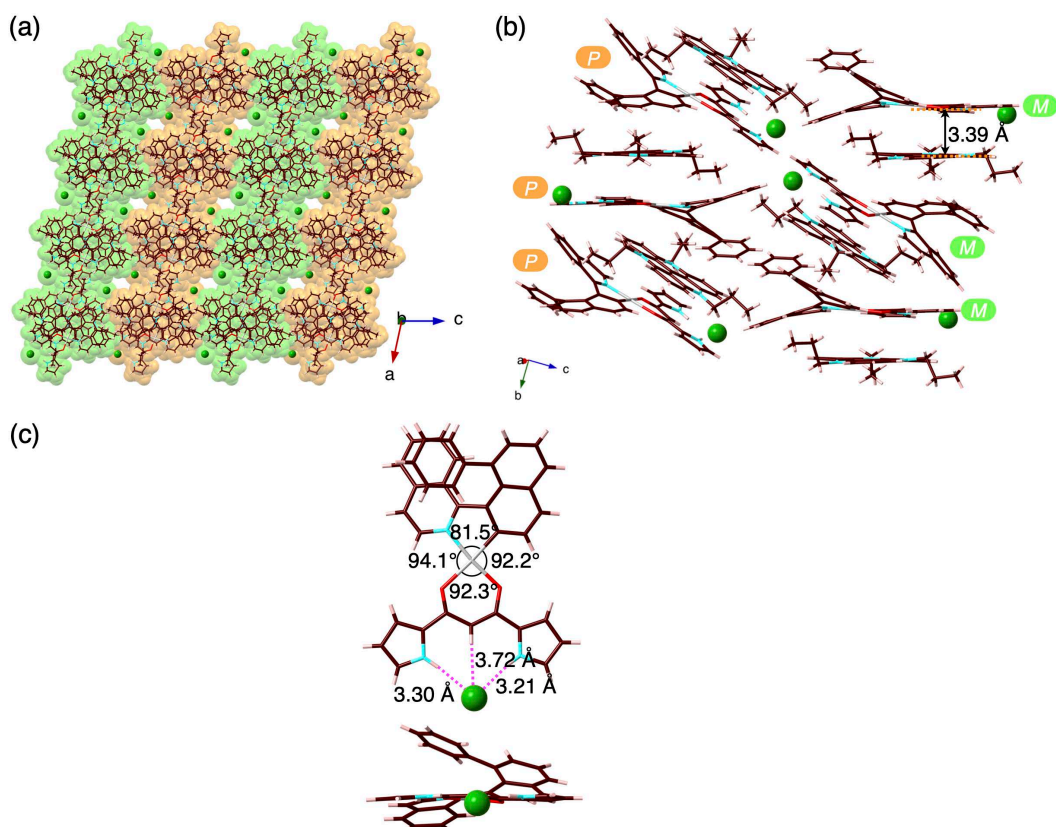

**Fig. S14** Packing diagrams of  $3\mathbf{a}\cdot\text{Cl}^-$ -TATA<sup>+</sup>: (a) top view of the charge-by-charge assembly, (b) side view of the charge-by-charge columnar structure, and (c) top and side views of  $3\mathbf{a}\cdot\text{Cl}^-$ . The distances between the TATA<sup>+</sup> mean planes (core 22 atoms) and the dipyrrolyldiketone Pt<sup>II</sup> complex units with Cl<sup>-</sup> (17 atoms) are 3.39 Å. Each charge-by-charge column is composed of either of the enantiomers. The N(-H)⋯Cl<sup>-</sup> and C<sub>bridging</sub>(-H)⋯Cl<sup>-</sup> hydrogen-bonding distances are 3.30/3.21 and 3.72 Å, respectively. The  $\tau_4$  value,<sup>[S1]</sup> which serves as a geometry index for the four-coordinate Pt complex, is 0.09, suggesting an almost square planar structure. The colors orange and green in (a) represent *P*- and *M*-helical enantiomers, respectively. Atom color code: brown, pink, cyan, red, yellow green (spherical), and gray refer to carbon, hydrogen, nitrogen, oxygen, chlorine, and platinum, respectively.



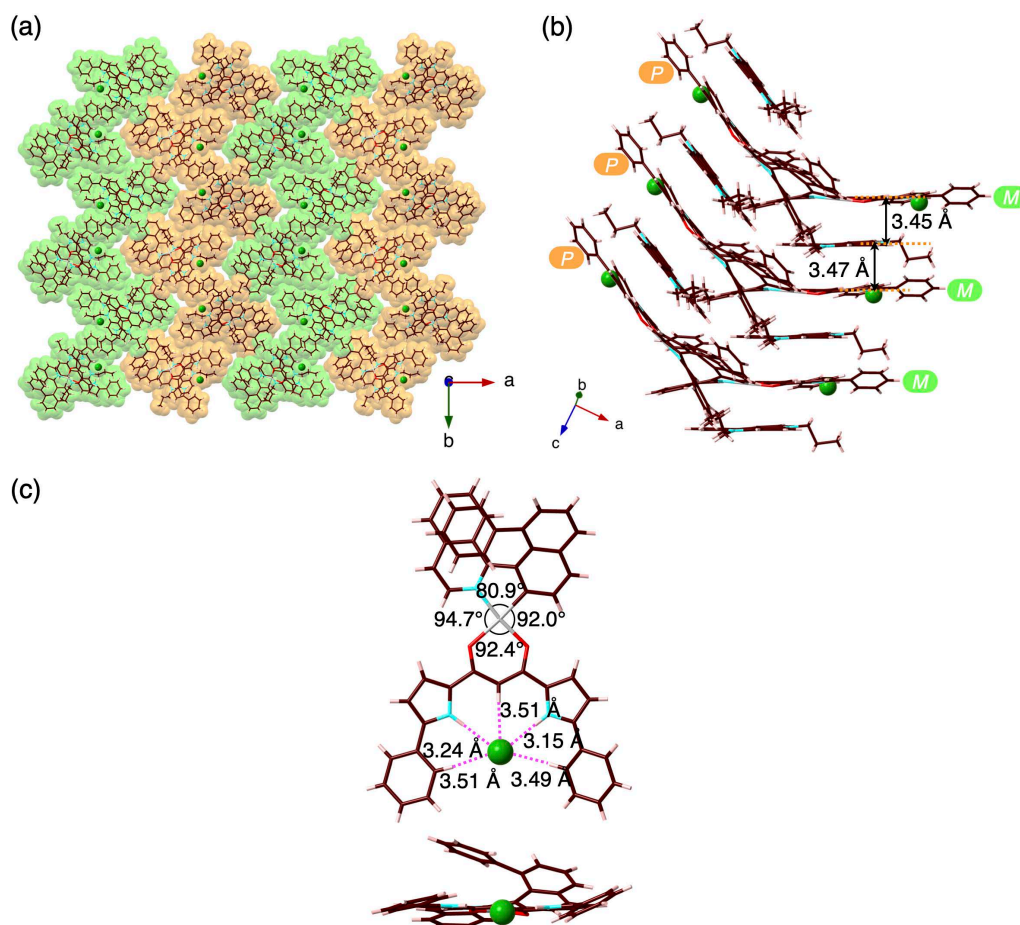

**Fig. S15** Packing diagrams of  $3b \cdot Cl^- \cdot TATA^+$ : (a) top view of the charge-by-charge assembly, (b) side view of the charge-by-charge columnar structure, and (c) top and side views of  $3b \cdot Cl^- \cdot TATA^+$ . The distances between the  $TATA^+$  mean planes (core 22 atoms) and the dipyrrolyldiketone  $Pt^{II}$  complex units with  $Cl^-$  (29 atoms) are 3.45 and 3.47 Å with the  $Pt \cdots Pt$  distance of 8.48 Å. Each charge-by-charge column is composed of either of the enantiomer. The  $N(-H) \cdots Cl^-$ ,  $C_{bridging}(-H) \cdots Cl^-$ , and  $o-C_{phenyl}(-H) \cdots Cl^-$  hydrogen-bonding distances are 3.24/3.15, 3.51, and 3.51/3.49 Å, respectively. The  $\tau_4$  value,<sup>[S1]</sup> which serves as a geometry index for the four-coordinate Pt complex, is 0.09, suggesting an almost square planar structure. The colors orange and green in (a) represent *P*- and *M*-helical enantiomers, respectively. Atom color code: brown, pink, cyan, red, yellow green (spherical), and gray refer to carbon, hydrogen, nitrogen, oxygen, chlorine, and platinum, respectively.

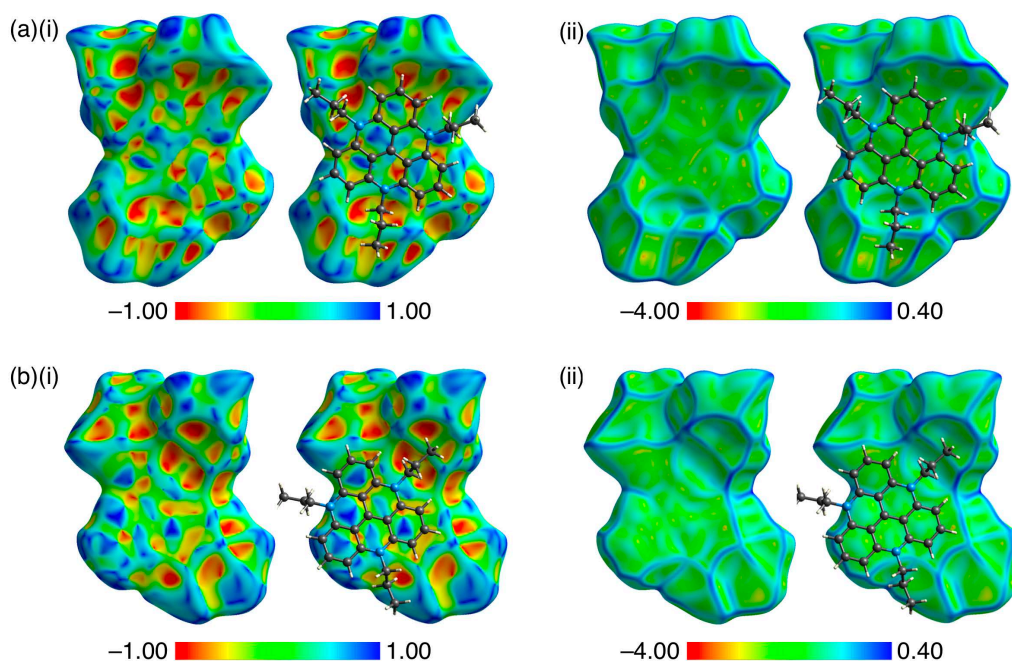

**Fig. S16** Hirshfeld surfaces<sup>[S2]</sup> of  $2\mathbf{a}\cdot\text{Cl}^-$  (independent structures (a,b) and (c,d), wherein (b,d) show different sides of (a,c)) in the crystal structure of  $2\mathbf{a}\cdot\text{Cl}^-$ -TATA<sup>+</sup> mapped over (i) shape-index and (ii) curvedness properties for only surface (left) and surface with a ball-and-stick model of the neighboring TATA<sup>+</sup> (right). Shape index is a qualitative measure of shape and is sensitive to subtle changes in surface shape, particularly in a flat region by differing by signs representing complementary bumps (blue) and hollows (red), whereas curvedness is a function of the root-mean-square curvature of the surface, and maps of curvedness typically show large regions of green (relatively flat) separated by dark blue edges (large positive curvature). The flat region on the curvedness surface suggested the characteristic mapping pattern for stacking between TATA<sup>+</sup> and  $2\mathbf{a}\cdot\text{Cl}^-$ .

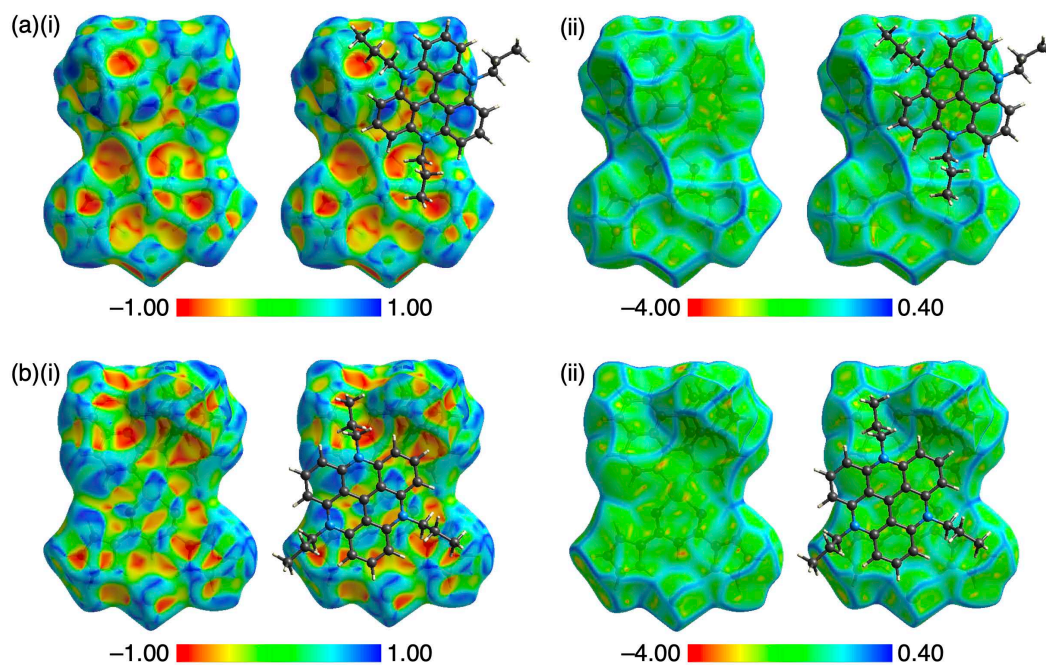

**Fig. S17** Hirshfeld surfaces<sup>[S2]</sup> of  $3\mathbf{a}\cdot\text{Cl}^-$  ((a,b) for different sides) in the crystal structure of  $3\mathbf{a}\cdot\text{Cl}^-$ -TATA<sup>+</sup> mapped over (i) shape-index and (ii) curvedness properties for only surface (left) and surface with a ball-and-stick model of the neighboring TATA<sup>+</sup> (right). Shape index is a qualitative measure of shape and is sensitive to subtle changes in surface shape, particularly in a flat region by differing by signs representing complementary bumps (blue) and hollows (red), whereas curvedness is a function of the root-mean-square curvature of the surface, and maps of curvedness typically show large regions of green (relatively flat) separated by dark blue edges (large positive curvature). The flat region on the curvedness surface suggested the characteristic mapping pattern for stacking between TATA<sup>+</sup> and  $3\mathbf{a}\cdot\text{Cl}^-$ .



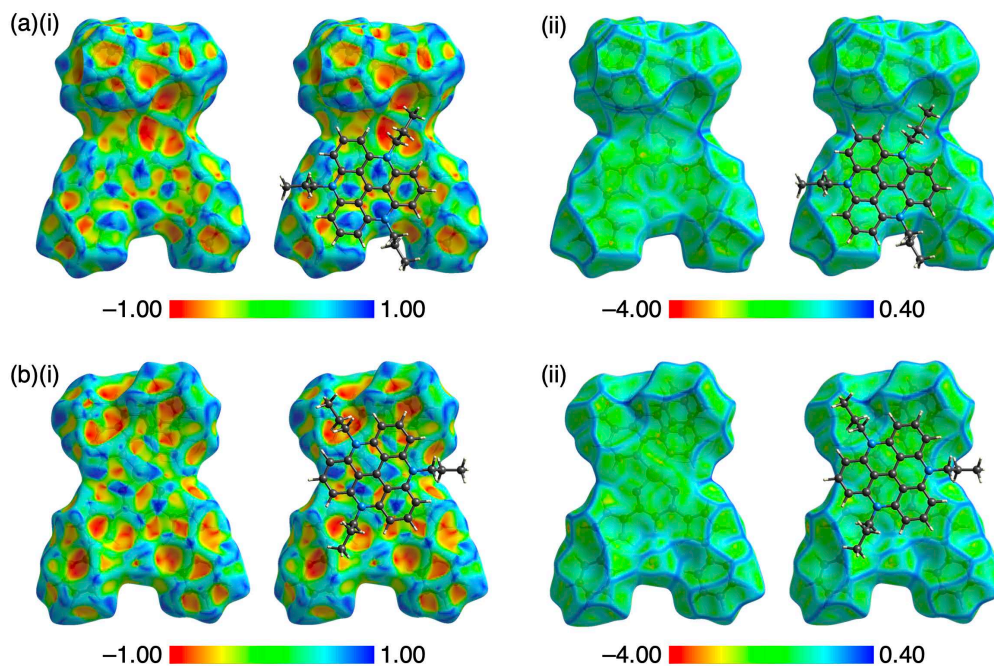

**Fig. S18** Hirshfeld surfaces<sup>[S2]</sup> of  $3\mathbf{b}\cdot\text{Cl}^-$  ((a,b) for different sides) in the crystal structure of  $3\mathbf{b}\cdot\text{Cl}^-$ -TATA<sup>+</sup> mapped over (i) shape-index and (ii) curvedness properties for only surface (left) and surface with a ball-and-stick model of the neighboring TATA<sup>+</sup> (right). Shape index is a qualitative measure of shape and is sensitive to subtle changes in surface shape, particularly in a flat region by differing by signs representing complementary bumps (blue) and hollows (red), whereas curvedness is a function of the root-mean-square curvature of the surface, and maps of curvedness typically show large regions of green (relatively flat) separated by dark blue edges (large positive curvature). The flat region on the curvedness surface suggested the characteristic mapping pattern for stacking between TATA<sup>+</sup> and  $3\mathbf{b}\cdot\text{Cl}^-$ .

[S1] L. Yang, D. R. Powell and R. P. Houser, *Dalton Trans.*, 2007, 955–964.

[S2] P. R. Spackman, M. J. Turner, J. J. McKinnon, S. K. Wolff, D. J. Grimwood, D. Jayatilaka and M. A. Spackman, *J. Appl. Cryst.*, 2021, **54**, 1006–1011.

### 3. Theoretical Studies

**Computational Method.** Calculations were performed using the *Gaussian 16* program.<sup>[S3]</sup> The ground states ( $S_0$ ) and excited triplet states ( $T_1$ ) were optimized at the B3LYP level by using 6-31G(d,p) basis set for C, H, N, O, and Cl and the LanL2DZ basis set and associated effective core potentials for Pt, whereas the excited singlet states ( $S_1$ ) were optimized using the TD-DFT calculations at the same level to the ground states. For the discussion on the low phosphorescence intensities of the Pt<sup>II</sup> complexes,  $T_1$  were optimized at the TD-CAM-B3LYP level within the Tamm-Dancoff approximation by using 6-31+G(d,p) basis set for C, H, N, and O and the LanL2DZ basis set and associated effective core potentials for Pt. The solvent effect of CH<sub>2</sub>Cl<sub>2</sub> was considered using a polarizable continuum model (PCM).

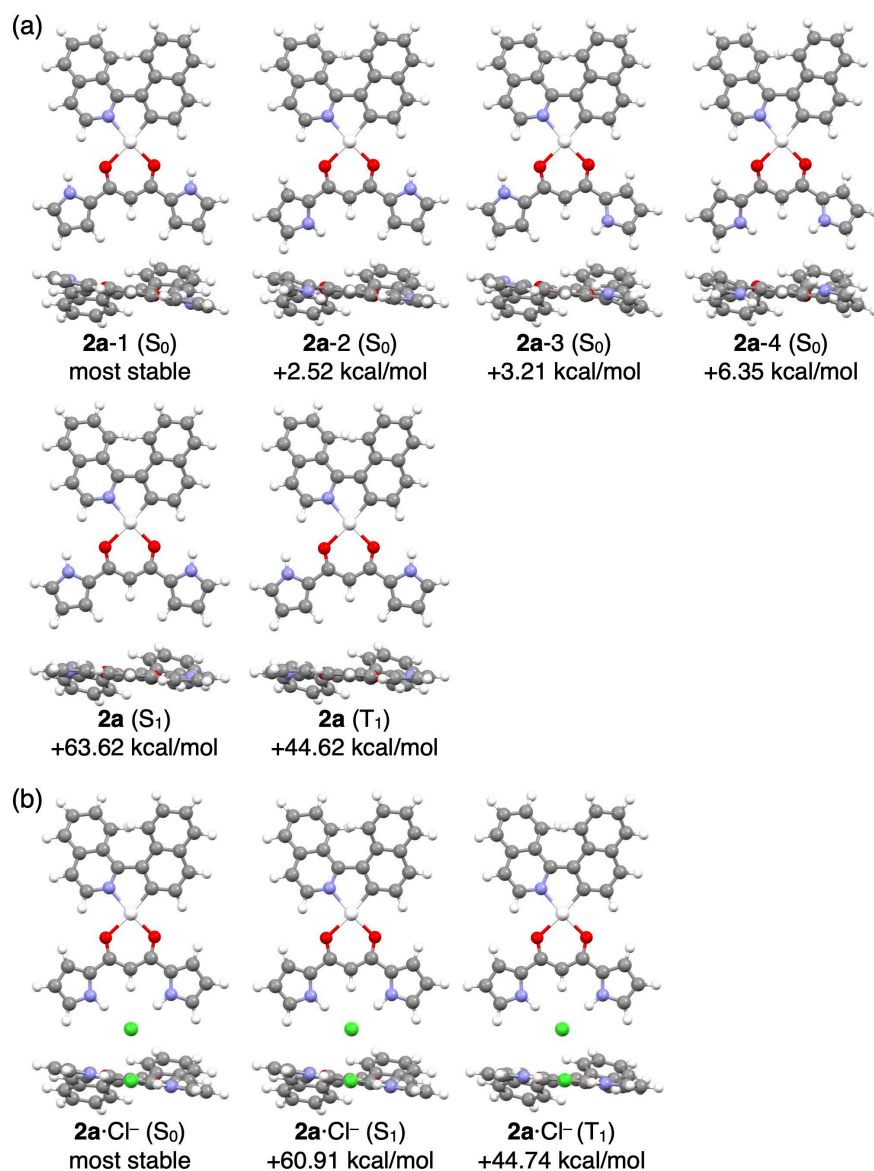

**Fig. S19** Optimized structures and relative energies of (a) **2a** (four conformations for  $S_0$ ) and (b) **2a·Cl<sup>-</sup>**, calculated as *P*-tyle helices, in the ground ( $S_0$ ) state and singlet ( $S_1$ ) and triplet ( $T_1$ ) excited states.

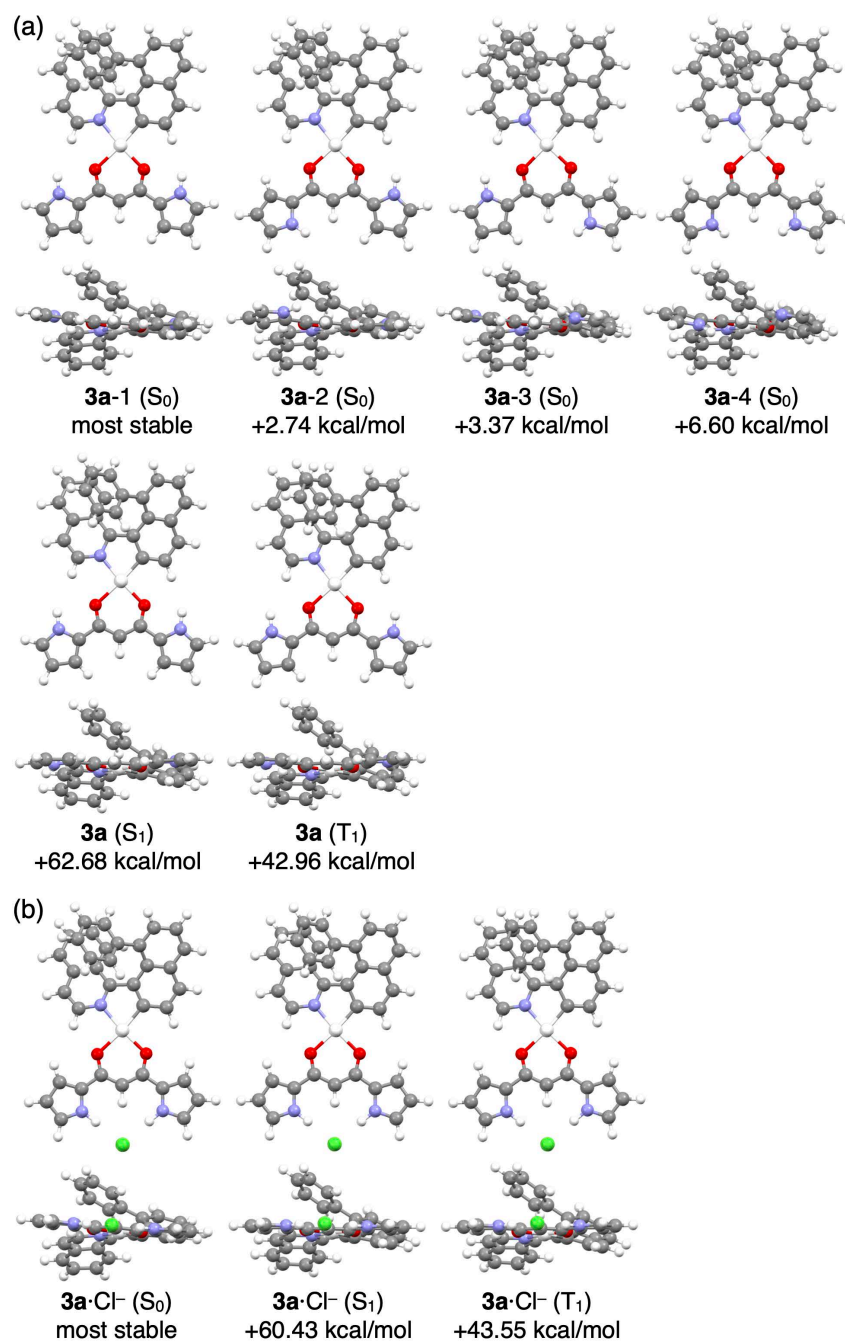

**Fig. S20** Optimized structures and relative energies of (a) **3a** (four conformations for S<sub>0</sub>) and (b) **3a·Cl<sup>-</sup>**, calculated as *P*-tyle helices, in the ground (S<sub>0</sub>) state and singlet (S<sub>1</sub>) and triplet (T<sub>1</sub>) excited states.

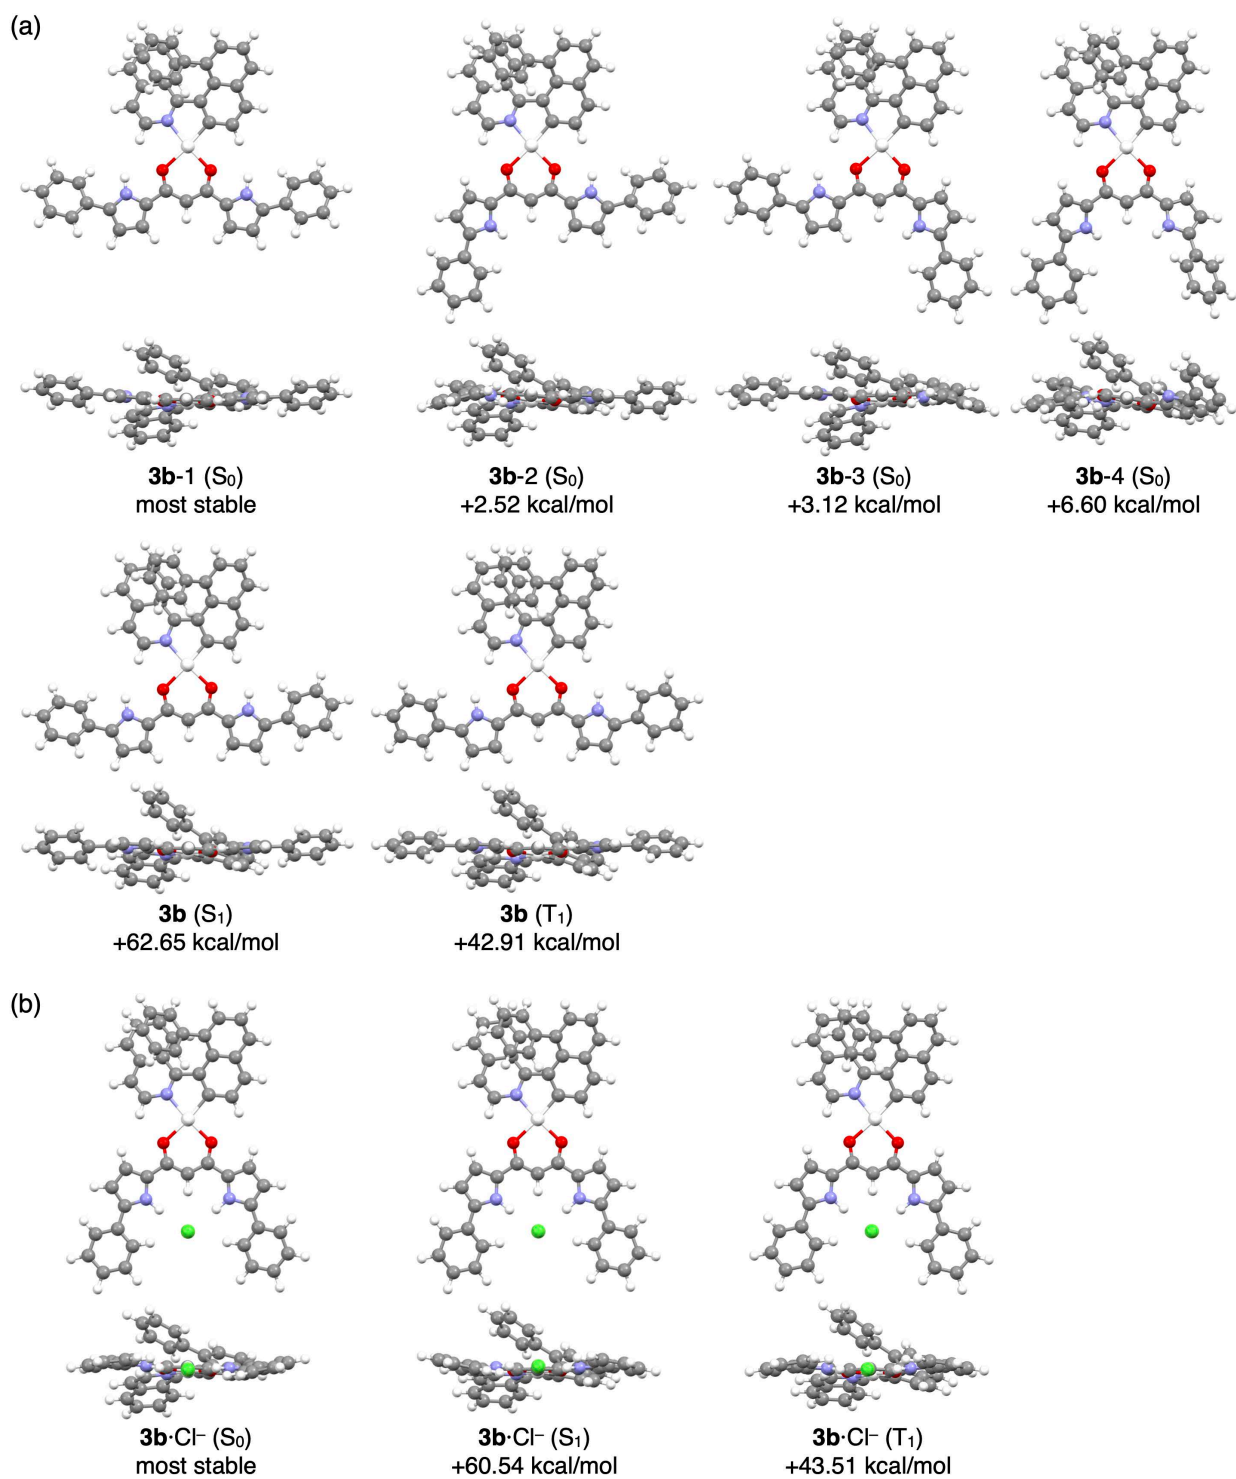

**Fig. S21** Optimized structures and relative energies of (a) **3b** (four conformations for  $S_0$ ) and (b) **3b·Cl<sup>-</sup>**, calculated as *P*-tyle helices, in the ground ( $S_0$ ) state and singlet ( $S_1$ ) and triplet ( $T_1$ ) excited states.

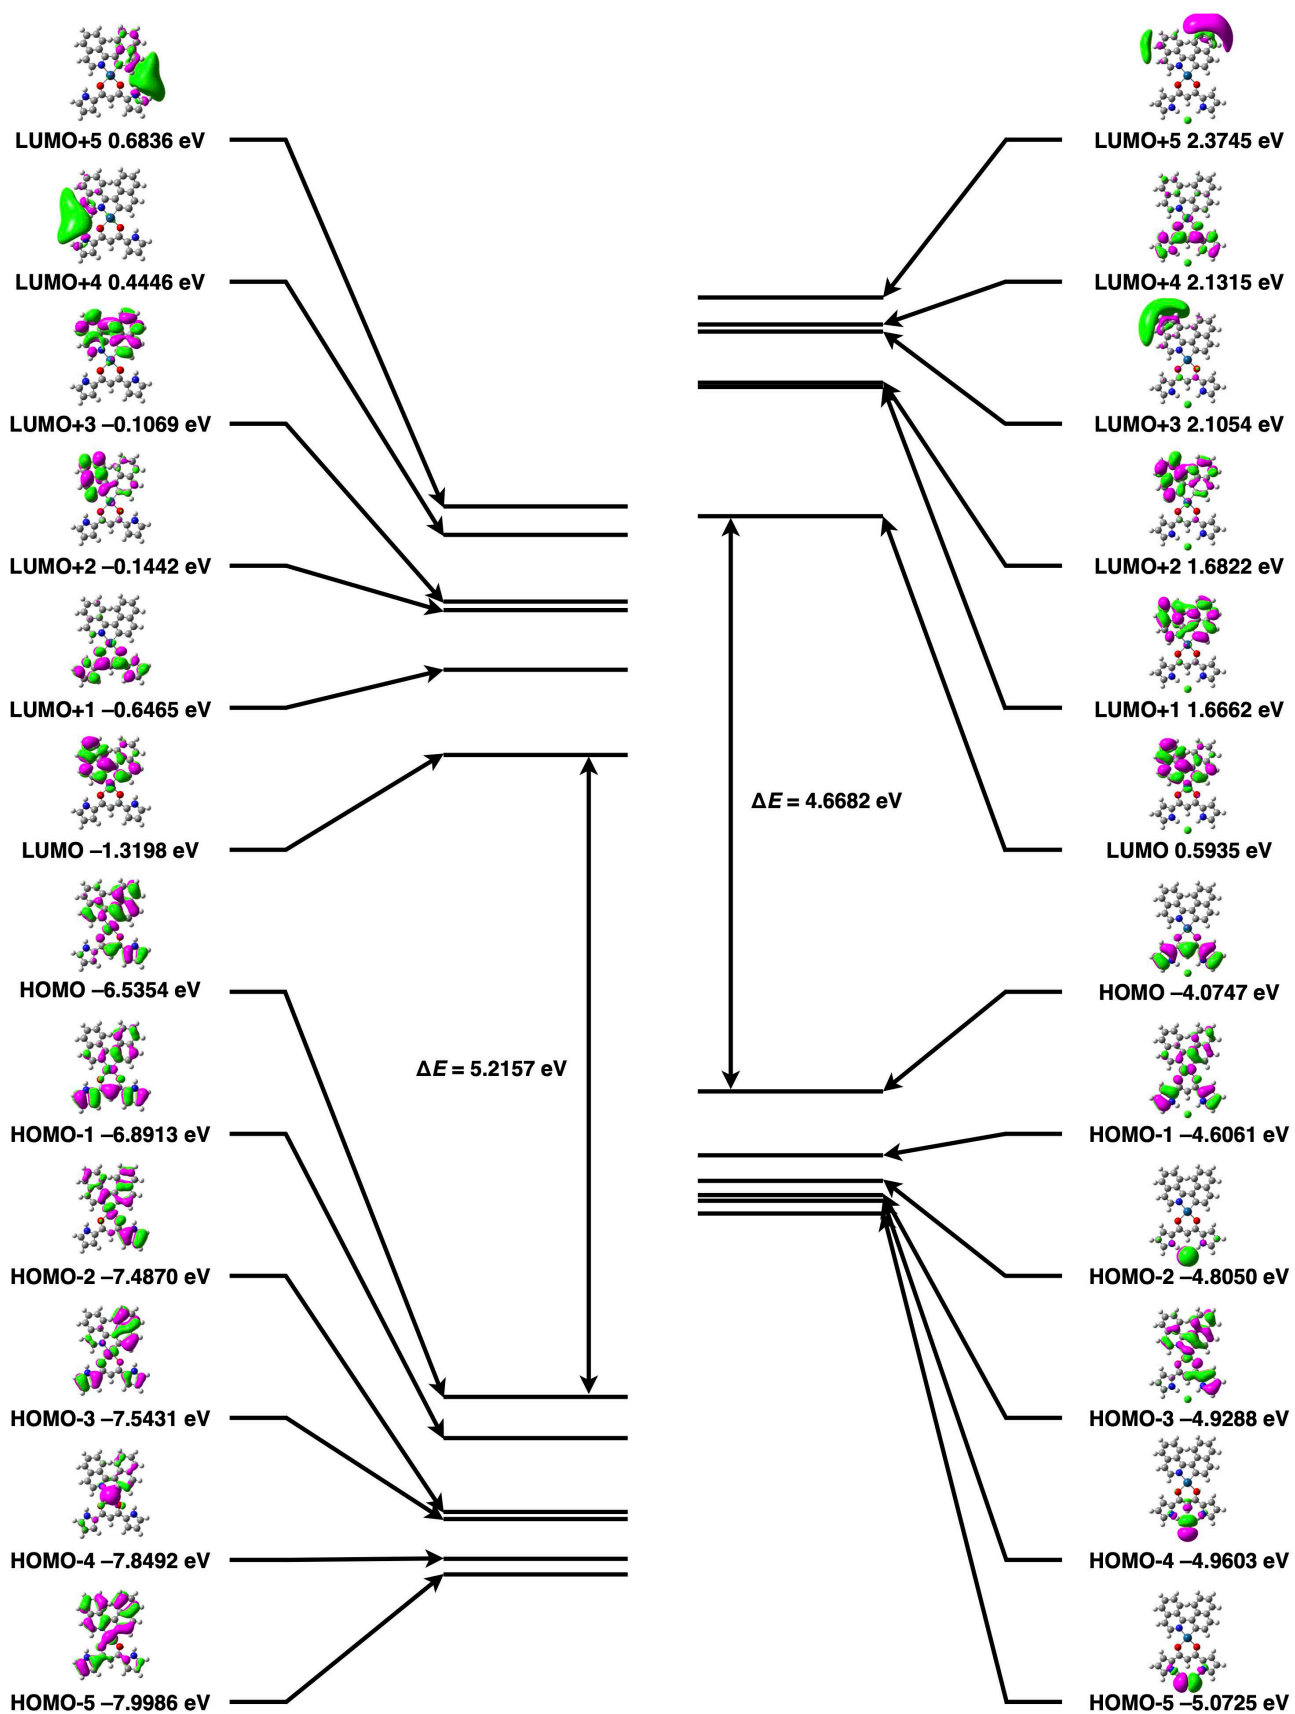

**Fig. S22** Molecular orbitals (HOMO and LUMO) of **2a** (left) and **2a·Cl<sup>-</sup>** (right) estimated at the CAM-B3LYP level by using 6-31+G(d,p) basis set for C, H, N, O, and Cl and the LanL2DZ basis set and associated effective core potentials for Pt.



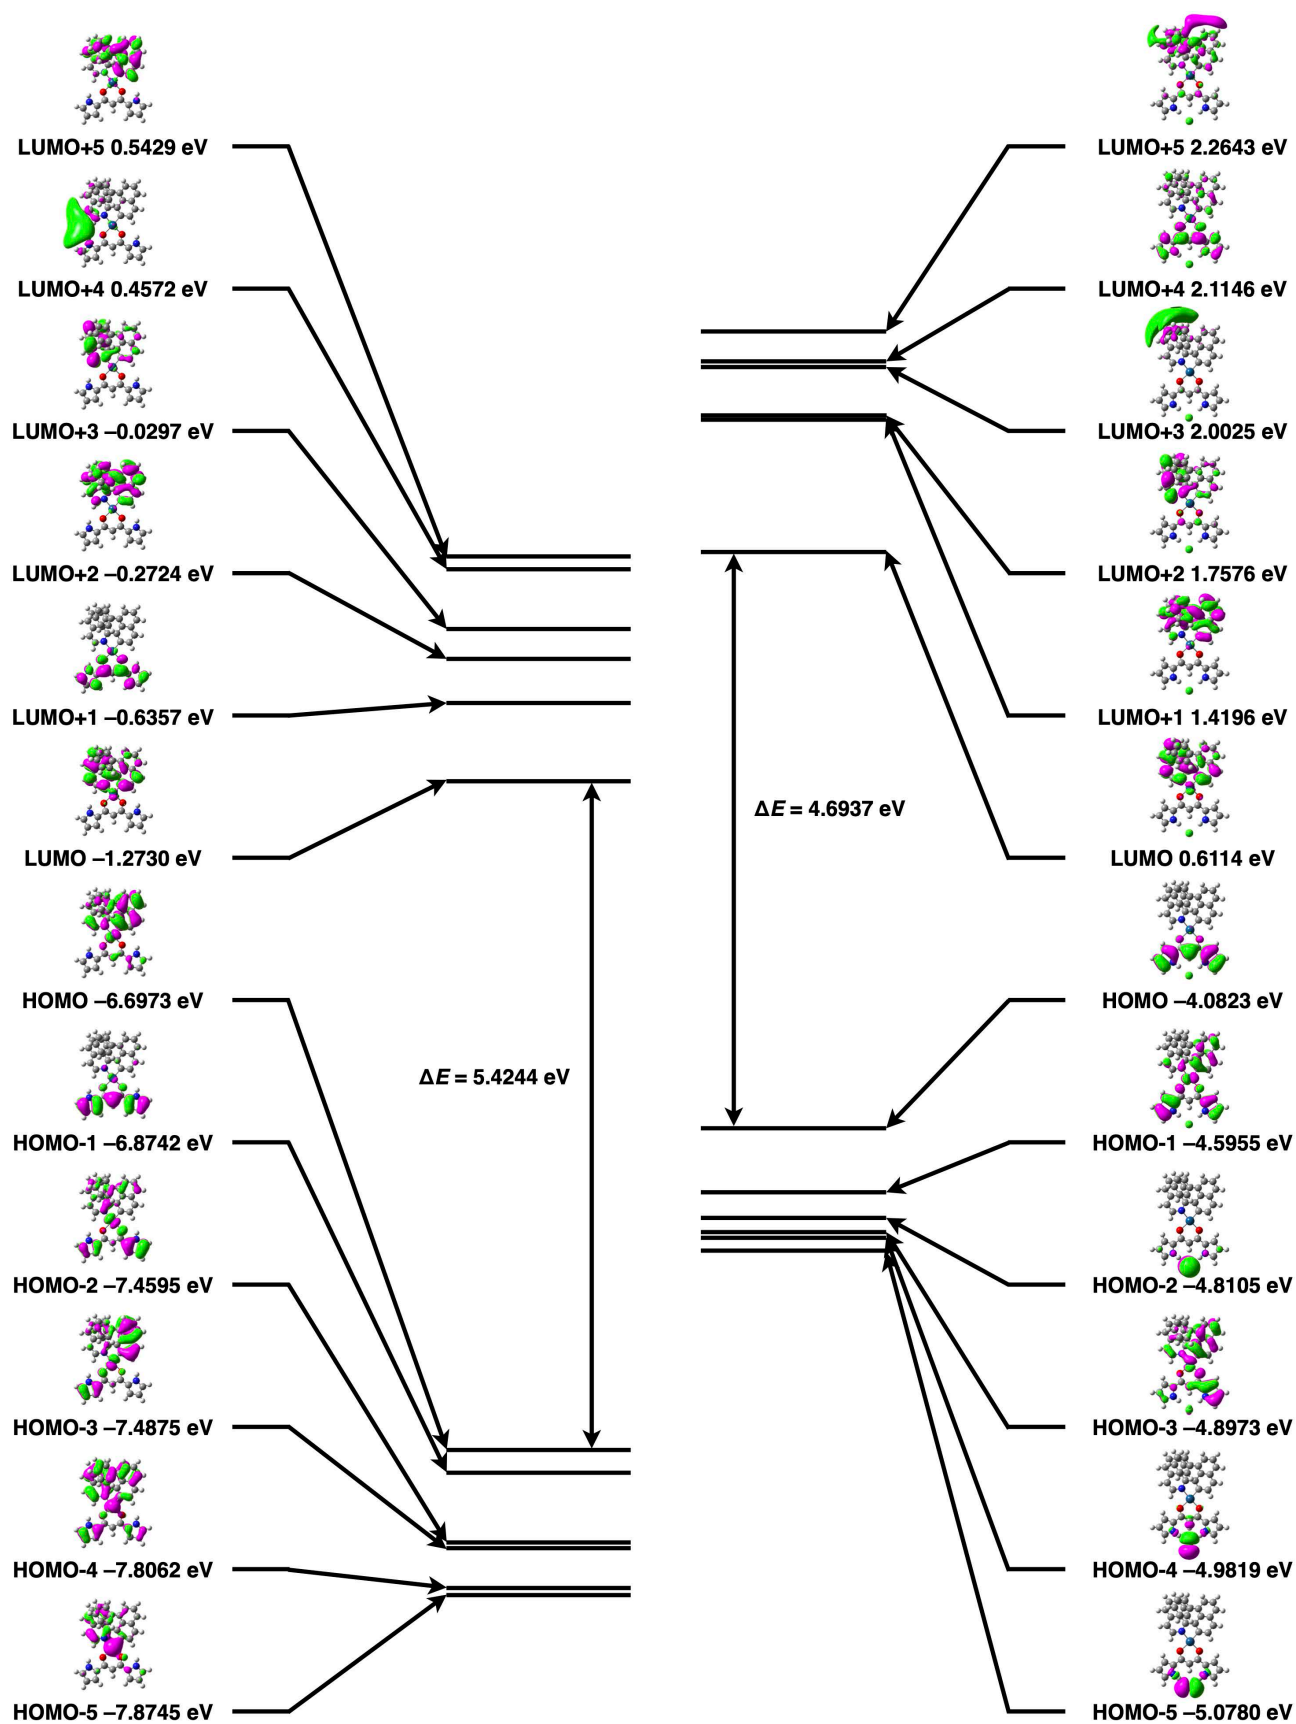

**Fig. S23** Molecular orbitals (HOMO and LUMO) of **3a** (left) and **3a·Cl<sup>-</sup>** (right) estimated at the CAM-B3LYP level by using 6-31+G(d,p) basis set for C, H, N, O, and Cl and the LanL2DZ basis set and associated effective core potentials for Pt.

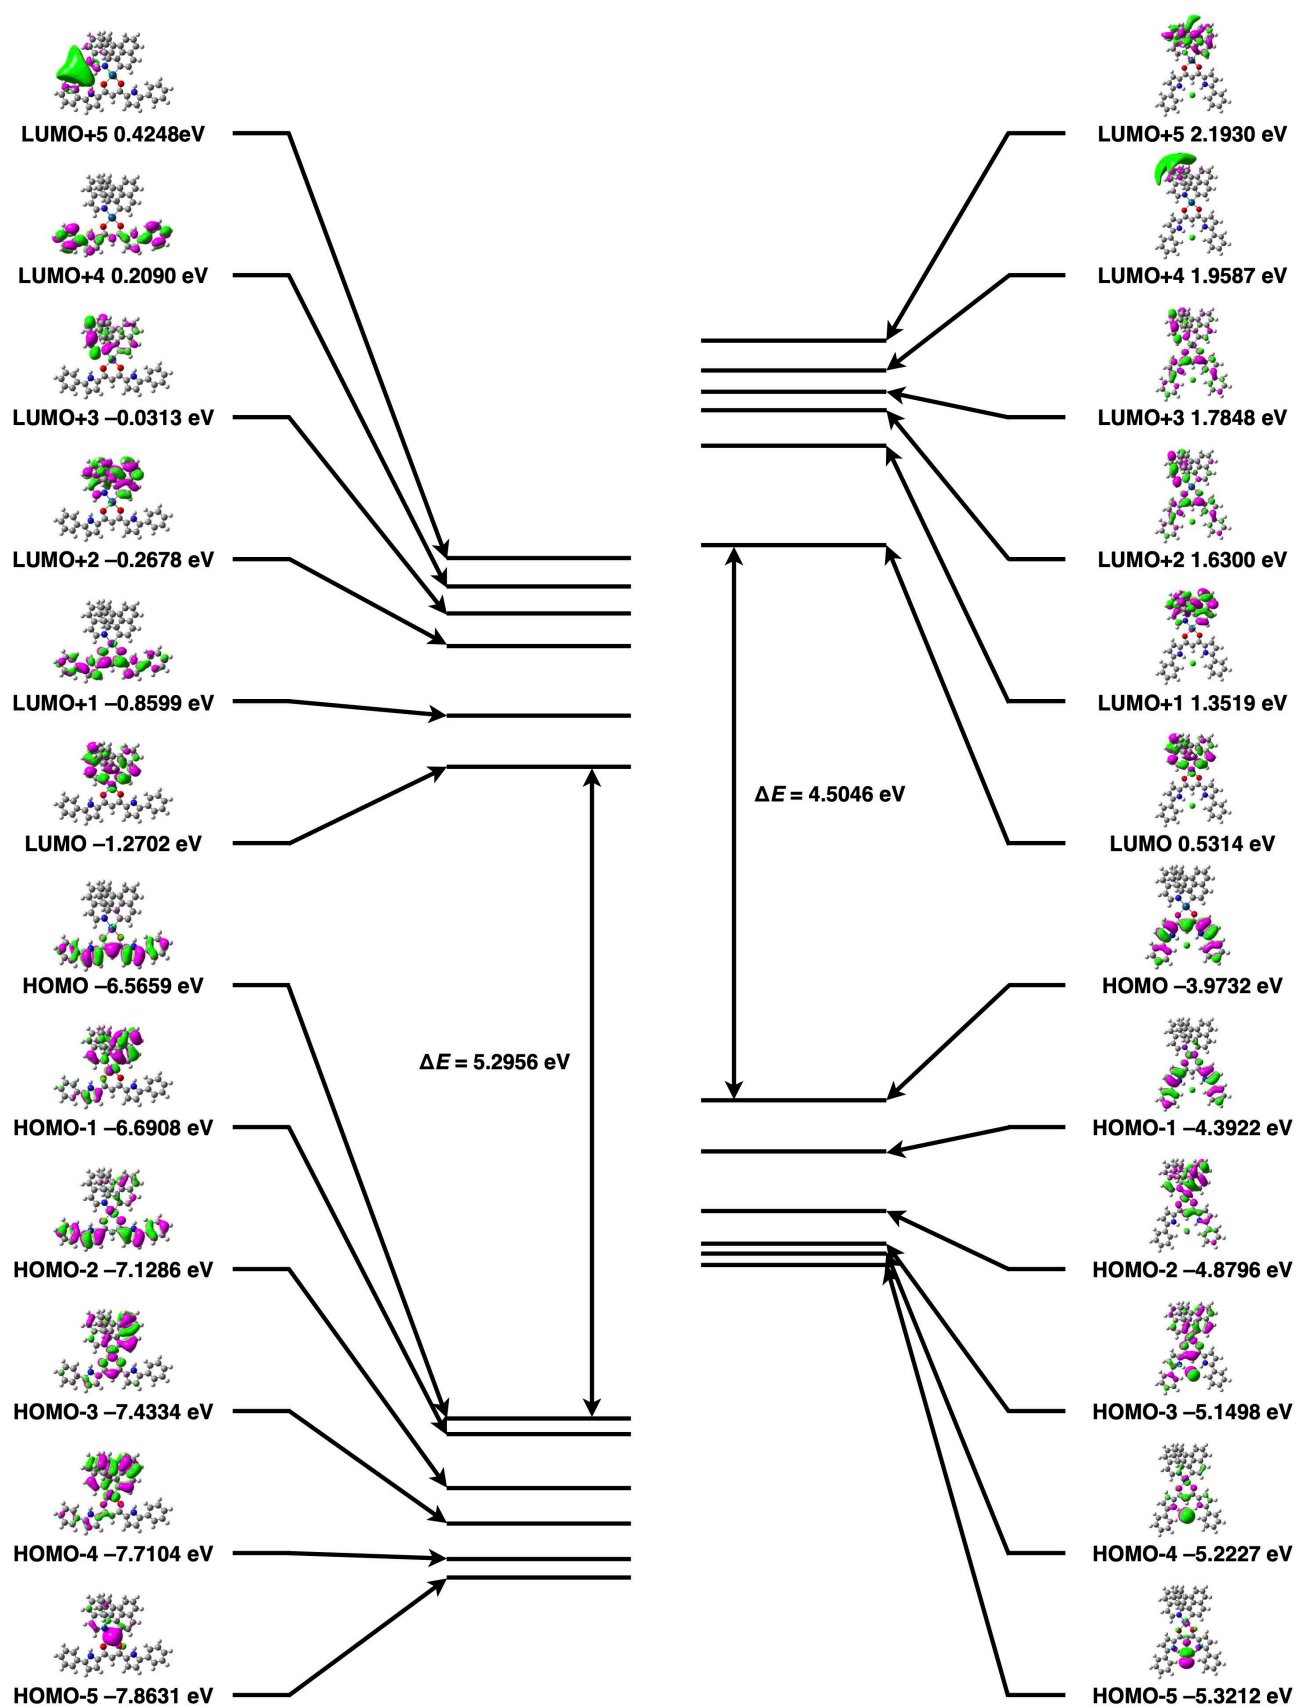

**Fig. S24** Molecular orbitals (HOMO and LUMO) of **3b** (left) and **3b·Cl<sup>-</sup>** (right) estimated at the CAM-B3LYP level by using 6-31+G(d,p) basis set for C, H, N, O, and Cl and the LanL2DZ basis set and associated effective core potentials for Pt.

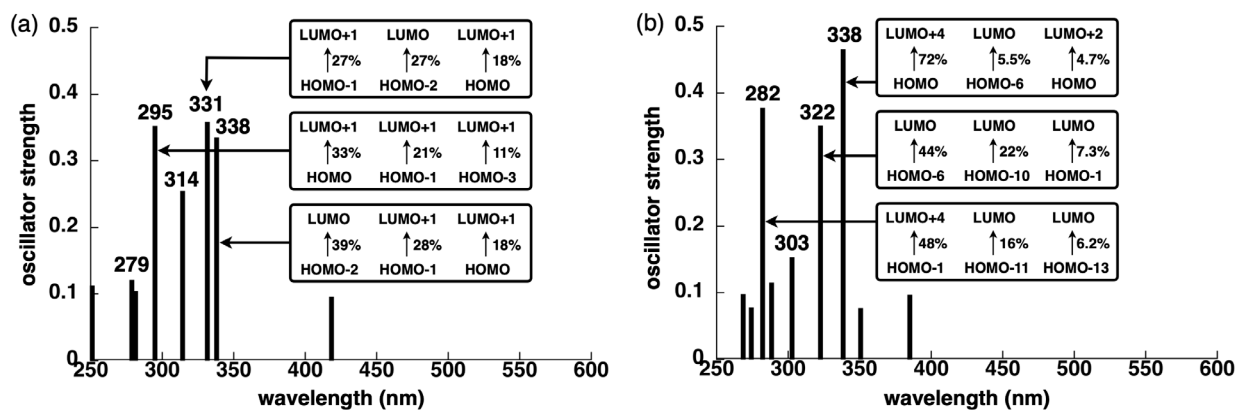

Fig. S25 TD-DFT-based UV/vis absorption stick spectra of (a) **2a** and (b) **2a**·Cl<sup>-</sup> with the transitions correlated with molecular orbitals estimated at the CAM-B3LYP level by using 6-31+G(d,p) basis set for C, H, N, and O and the LanL2DZ basis set and associated effective core potentials for Pt.

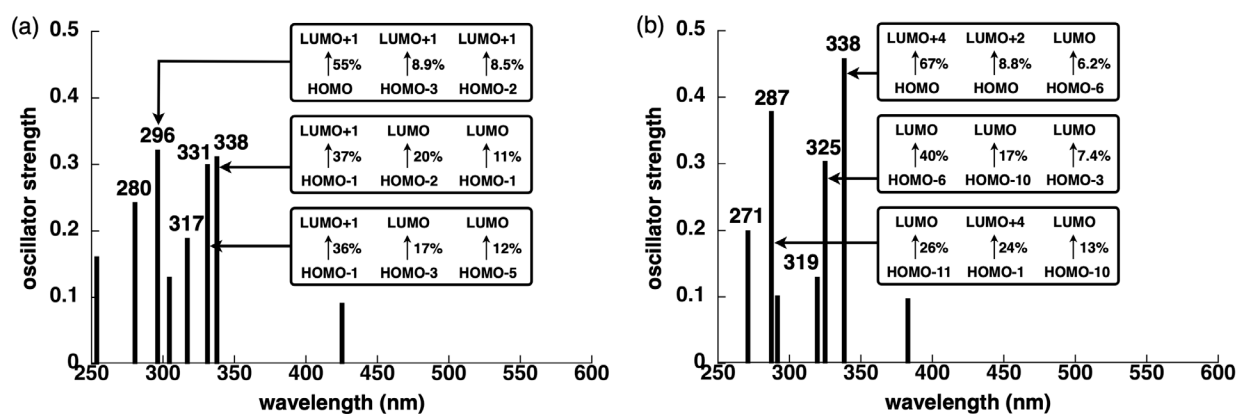

Fig. S26 TD-DFT-based UV/vis absorption stick spectra of (a) **3a** and (b) **3a**·Cl<sup>-</sup> with the transitions correlated with molecular orbitals estimated at the CAM-B3LYP level by using 6-31+G(d,p) basis set for C, H, N, and O and the LanL2DZ basis set and associated effective core potentials for Pt.

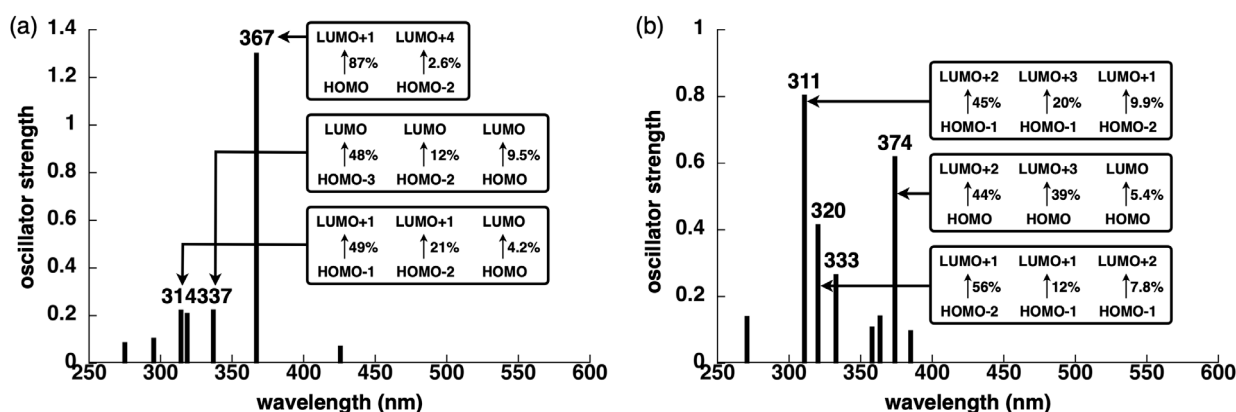

Fig. S27 TD-DFT-based UV/vis absorption stick spectra of (a) **3b** and (b) **3b**·Cl<sup>-</sup> with the transitions correlated with molecular orbitals estimated at the CAM-B3LYP level by using 6-31+G(d,p) basis set for C, H, N, and O and the LanL2DZ basis set and associated effective core potentials for Pt.



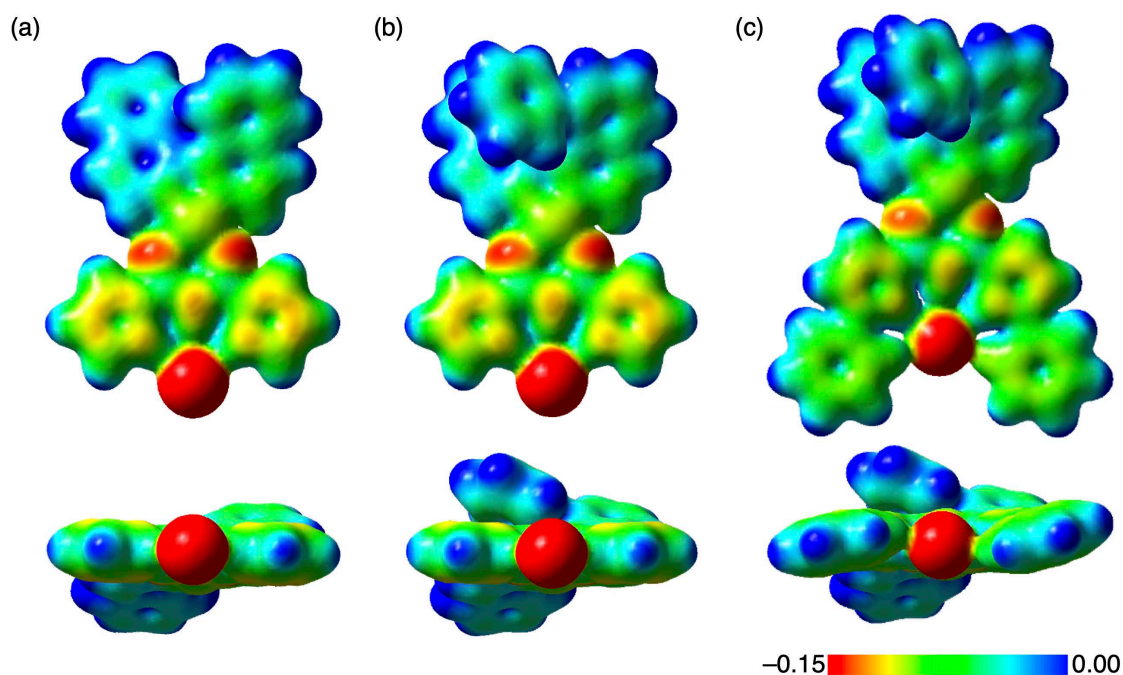

**Fig. S28** Electrostatic potential (ESP) mapping ( $\delta = 0.01$ ) of (a)  $2a \cdot Cl^-$ , (b)  $3a \cdot Cl^-$ , and (c)  $3b \cdot Cl^-$  calculated at the CAM-B3LYP level by using 6-31+G(d,p) basis set for C, H, N, O, and Cl and the LanL2DZ basis set and associated effective core potentials for Pt.

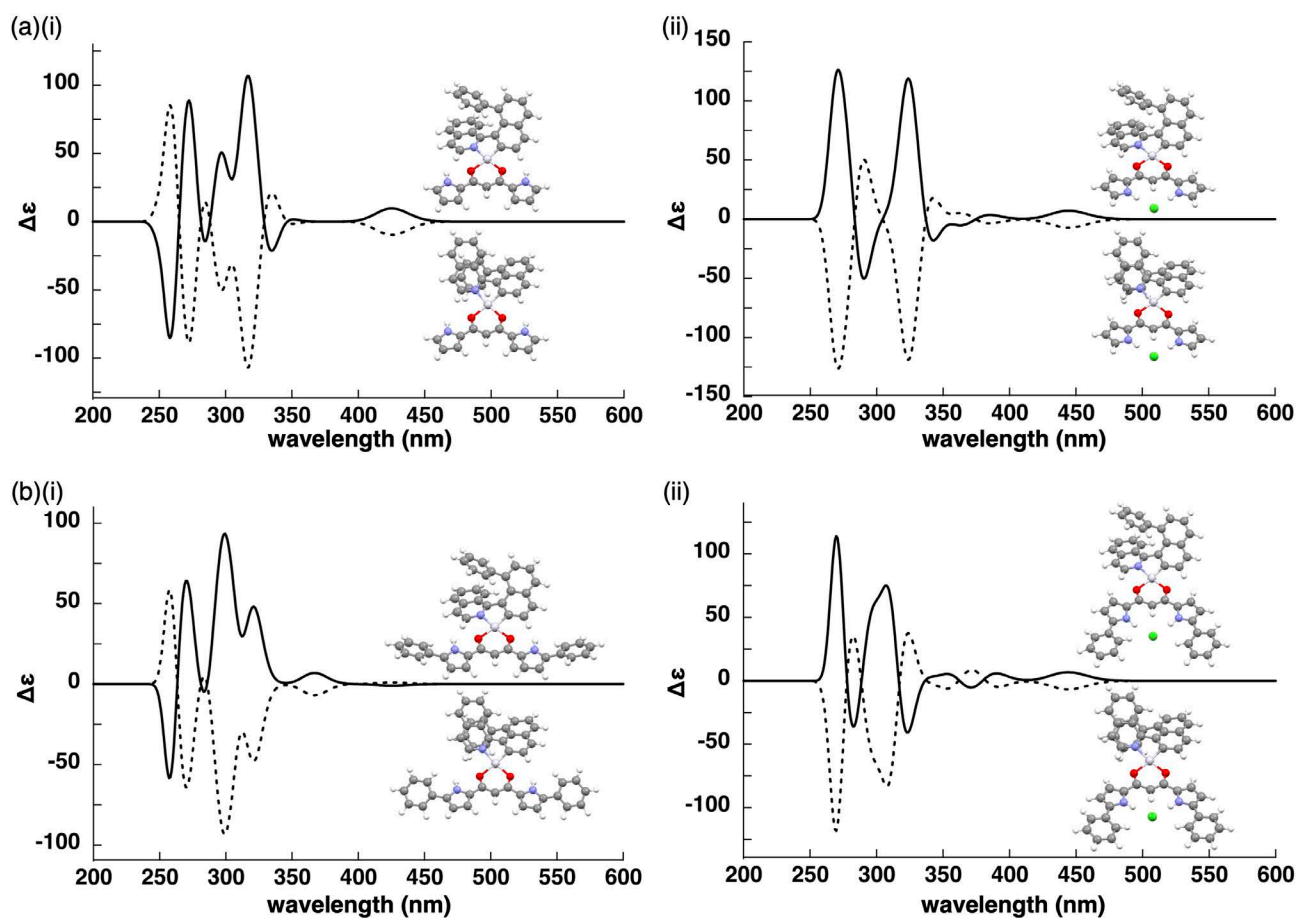

**Fig. S29** Theoretical CD spectra of dipyrrolyldiketone  $Pt^{II}$  complexes estimated by using TD-DFT calculation at CAM-B3LYP/6-31+G(d,p) level: (a)  $3a$  and (b)  $3b$  for (i)  $Cl^-$ -free states and (ii)  $Cl^-$  complexes ( $P$  helix: solid line;  $M$  helix: dotted line).

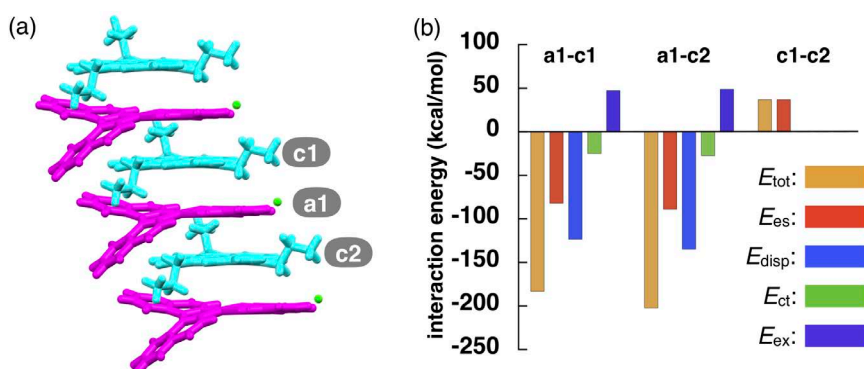

**Fig. S30** Single-crystal X-ray structure of **2a**·Cl<sup>-</sup>-TATA<sup>+</sup> for the EDA calculations (Table S1): (a) single-crystal X-ray structure and (b) intermolecular interaction energies (kcal/mol) between selected ions estimated at an FMO2-MP2 using mixed basis sets including NOSeC-V-TZP for Pt and NOSeC-V-DZP for the other atoms.<sup>[S4-6]</sup> The labels (c1-4 and a1,2) correspond to the fragments shown in Table S1.

**Table S1** Energies between selected fragments in **2a**·Cl<sup>-</sup>-TATA<sup>+</sup> (Fig. S30) estimated by EDA calculation based on an FMO2-MP2 using mixed basis sets including NOSeC-V-TZP for Pt and NOSeC-V-DZP for the other atoms.<sup>[S4-6]</sup>

| fragments | total interaction energy ( $E_{tot}$ ) (kcal/mol) | electrostatic interaction energy ( $E_{es}$ ) (kcal/mol) | dispersion interaction energy ( $E_{disp}$ ) (kcal/mol) | charge-transfer interaction energy ( $E_{ct+mix}$ ) (kcal/mol) | exchange repulsion interaction energy ( $E_{ex}$ ) (kcal/mol) |
|-----------|---------------------------------------------------|----------------------------------------------------------|---------------------------------------------------------|----------------------------------------------------------------|---------------------------------------------------------------|
| a1-c1     | -183.318                                          | -82.032                                                  | -123.371                                                | -24.992                                                        | 47.077                                                        |
| a1-c2     | -202.377                                          | -89.106                                                  | -134.735                                                | -27.404                                                        | 48.869                                                        |
| c1-c2     | 36.716                                            | 36.716                                                   | 0.000                                                   | 0.000                                                          | 0.000                                                         |

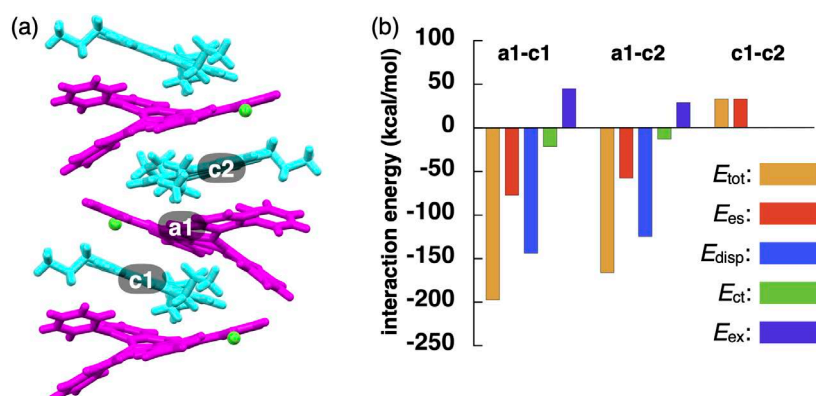

**Fig. S31** Single-crystal X-ray structure of **3a**·Cl<sup>-</sup>-TATA<sup>+</sup> for the EDA calculations (Table S2): (a) single-crystal X-ray structure and (b) intermolecular interaction energies (kcal/mol) between selected ions estimated at an FMO2-MP2 using mixed basis sets including NOSeC-V-TZP for Pt and NOSeC-V-DZP for the other atoms.<sup>[S4-6]</sup> The labels (c1,2 and a1) correspond to the fragments shown in Table S2.

**Table S2** Energies between selected fragments in **3a**·Cl<sup>-</sup>-TATA<sup>+</sup> (Fig. S31) estimated by EDA calculation based on an FMO2-MP2 using mixed basis sets including NOSeC-V-TZP for Pt and NOSeC-V-DZP for the other atoms.<sup>[S4-6]</sup>

| fragments | total interaction energy ( $E_{tot}$ ) (kcal/mol) | electrostatic interaction energy ( $E_{es}$ ) (kcal/mol) | dispersion interaction energy ( $E_{disp}$ ) (kcal/mol) | charge-transfer interaction energy ( $E_{ct+mix}$ ) (kcal/mol) | exchange repulsion interaction energy ( $E_{ex}$ ) (kcal/mol) |
|-----------|---------------------------------------------------|----------------------------------------------------------|---------------------------------------------------------|----------------------------------------------------------------|---------------------------------------------------------------|
| a1-c1     | -197.553                                          | -77.112                                                  | -143.814                                                | -21.559                                                        | 44.931                                                        |
| a1-c2     | -166.012                                          | -57.707                                                  | -124.570                                                | -12.825                                                        | 29.091                                                        |
| c1-c2     | 33.301                                            | 33.301                                                   | 0.000                                                   | 0.000                                                          | 0.000                                                         |

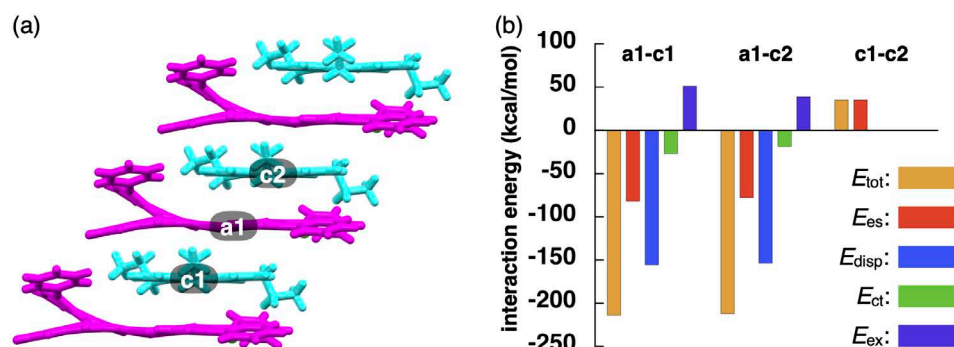

**Fig. S32** Single-crystal X-ray structure of **3b**·Cl-TATA<sup>+</sup> for the EDA calculations (Table S3): (a) single-crystal X-ray structure and (b) intermolecular interaction energies (kcal/mol) between selected ions estimated at an FMO2-MP2 using mixed basis sets including NOSeC-V-TZP for Pt and NOSeC-V-DZP for the other atoms.<sup>[S4-6]</sup> The labels (c1,2 and a1) correspond to the fragments shown in Table S3.

**Table S3** Energies between selected fragments in **3b**·Cl-TATA<sup>+</sup> (Fig. S32) estimated by EDA calculation based on an FMO2-MP2 using mixed basis sets including NOSeC-V-TZP for Pt and NOSeC-V-DZP for the other atoms.<sup>[S4-6]</sup>

| fragments | total interaction energy ( $E_{\text{tot}}$ ) (kcal/mol) | electrostatic interaction energy ( $E_{\text{es}}$ ) (kcal/mol) | dispersion interaction energy ( $E_{\text{disp}}$ ) (kcal/mol) | charge-transfer interaction energy ( $E_{\text{ct}+\text{mix}}$ ) (kcal/mol) | exchange repulsion interaction energy ( $E_{\text{ex}}$ ) (kcal/mol) |
|-----------|----------------------------------------------------------|-----------------------------------------------------------------|----------------------------------------------------------------|------------------------------------------------------------------------------|----------------------------------------------------------------------|
| a1-c1     | -213.982                                                 | -82.226                                                         | -155.735                                                       | -27.022                                                                      | 51.001                                                               |
| a1-c2     | -211.938                                                 | -77.976                                                         | -153.770                                                       | -18.894                                                                      | 38.702                                                               |
| c1-c2     | 34.836                                                   | 34.836                                                          | 0.000                                                          | 0.000                                                                        | 0.000                                                                |

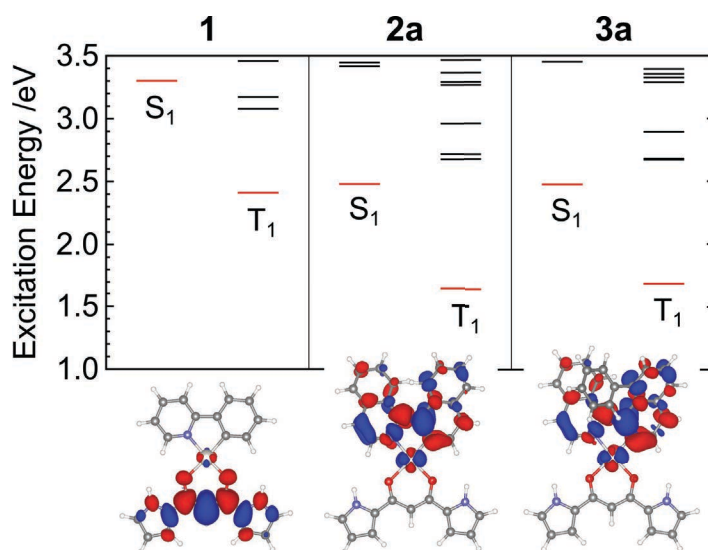

**Fig. S33** Energy levels of excited singlet state  $S_1$  and triplet state  $T_1$  optimized structures for **1** (left), **2a** (center), and **3a** (right). Inset shows electron density differences between  $T_1$  and  $S_0$  at the  $T_1$  optimized structures (isosurface value:  $1 \times 10^{-3}$  a.u.), in which red/blue regions are positive and negative, respectively. The  $T_1$  excitation energies of **2a** and **3a** are lower than **1**, indicating the smaller  $T_1$ - $S_0$  energy gap. The smaller  $T_1$ - $S_0$  energy gap causes faster nonradiative decay, which results in the smaller luminescence intensities.

#### Cartesian Coordination

##### 2a-1 ( $S_0$ )

(CAM-B3LYP/6-31G(d,p) for C, H, N, and O and CAM-B3LYP/LanL2DZ for Pt)

-1588.9231755 hartree

C,2.9763365376,-2.325826353,0.4449871257

C,4.3515675476,-2.4837047552,0.4261907334

C,4.689307956,-3.8365692082,0.7177126174

C,3.4187661082,-4.4699080291,0.9091929345

N,2.4343900038,-3.5502581838,0.7394384921

H,5.0766726781,-1.7108320227,0.2186646505

H,5.6027213696,-4.2995475032,0.7807908198

H,3.1940270106,-5.4975101911,1.1523322303

C,2.0873030946,-1.1852012624,0.2258420273

C,2.6530680338,0.0749716582,-0.0013849731

C,1.9678167456,1.2704649198,-0.2110006439

H,3.7322042966,0.1287850666,-0.0161163679

O,0.8371055268,-1.4574865484,0.2656605486

O,0.6913609754,1.448279682,-0.2240568997

C,2.72998369,2.4939969008,-0.4500945168  
C,4.0828652737,2.7881719653,-0.4626701183  
N,2.0609714715,3.6570507484,-0.731625267  
C,4.216213259,4.1612411909,-0.7599614825  
H,4.8861638984,2.0922013946,-0.2714346116  
C,2.944234301,4.6696510971,-0.9231324047  
H,5.1369662801,4.7194051096,-0.8449784102  
H,2.6118695403,5.6691580147,-1.1598548564  
Pt,-0.7024821634,-0.0066314254,0.0224990424  
C,-2.1471576174,2.6336752018,-0.1249637185  
C,-4.6424092802,1.432739461,0.4318809309  
C,-3.2566743148,3.4166326858,0.0128934254  
H,-1.1716510883,3.0801101623,-0.2775811355  
H,-3.1832717635,4.498668852,-0.0606394518  
C,-3.4987359595,0.6297701762,0.0843264505  
C,-2.2402901337,1.223784789,-0.0564933627  
C,-3.449780846,-0.8313996644,-0.0464529236  
C,-1.9828918249,-2.6720766109,0.1662828469  
C,-2.9784732396,-3.5822893265,0.002785724  
H,-0.9479630932,-2.9410497972,0.3309478062  
H,-2.7711653672,-4.6438770178,0.072809033  
N,-2.2148673193,-1.3337445487,0.1267550567  
H,1.0558868859,3.6939370289,-0.7908480163  
H,1.4404378062,-3.6872670205,0.8234629625  
C,-4.5152678593,2.8483408573,0.3421649101  
C,-5.6186770669,3.678042421,0.6565138569  
C,-6.7941452462,3.1495009696,1.1181287395  
H,-7.6295173764,3.7949213232,1.3685394131  
C,-6.8936848512,1.7567676678,1.3077255549  
H,-7.7984058287,1.334732074,1.7341065565  
C,-5.8524657618,0.9269181069,0.9771507397  
H,-5.9482699624,-0.1337908207,1.1685300827  
H,-5.5009777407,4.7528453822,0.5508246097  
C,-4.268342458,-3.1270937088,-0.3633955397  
C,-5.2989034721,-4.0284178231,-0.7247029432  
C,-6.4826144538,-3.5646605058,-1.2309941723  
H,-7.2622016109,-4.2616358751,-1.5210627813  
H,-5.117029447,-5.0938507469,-0.6239530685  
C,-6.6765862199,-2.1791291956,-1.4166613849  
H,-7.591522738,-1.8205483215,-1.8759537588  
C,-4.4991565762,-1.7272494716,-0.44662798  
C,-5.7130053251,-1.2843056139,-1.0337382463  
H,-5.8651674448,-0.2276966656,-1.2023978157

## 2a-2 (So)

### (CAM-B3LYP/6-31G(d,p) for C, H, N, and O and CAM-B3LYP/LanL2DZ for Pt)

-1588.9191542 hartree  
C,4.1793245492,2.2443120088,-0.419629976  
C,4.6895953795,3.1170700832,0.5206220169  
C,5.5375195579,4.0266423685,-0.1488811006  
C,5.5323736213,3.6811562694,-1.4815731753  
N,4.7012909069,2.6137416969,-1.6394673408  
H,4.443954244,3.0993874128,1.5713956339  
H,6.0890793263,4.8453160229,0.289422945  
H,6.0575799234,4.1090117518,-2.3223126363  
C,3.2426869247,1.1346973606,-0.229942057  
C,2.5863592661,0.590814011,-1.3468866486  
C,1.6926922494,-0.481309646,-1.3486577799  
H,2.7386521542,1.0744136432,-2.3021687277

O,3.09298922,0.755293425,0.9762319137  
O,1.3058241941,-1.1786177826,-0.3384292844  
C,1.0926150643,-0.9044135262,-2.6133557251  
C,1.2392789319,-0.4934331461,-3.9273971927  
N,0.1738977057,-1.9213293762,-2.6091284896  
C,0.3833560729,-1.2880723275,-4.7196214451  
H,1.8930126114,0.2905258203,-4.2801119705  
C,-0.2632840841,-2.1625404266,-3.8709878132  
H,0.2521914643,-1.2309052028,-5.790170492  
H,-0.9950628441,-2.9292095689,-4.0763396908  
Pt,1.8679213444,-0.8600988385,1.5898739122  
C,-0.1531059281,-3.1016939198,1.616462675  
C,-0.296119524,-3.0848169606,4.436380465  
C,-1.0351765422,-3.9278211029,2.2511983671  
H,-0.1133545236,-3.0635629083,0.533876  
H,-1.6972998586,-4.5747081246,1.6813088343  
C,0.7556355148,-2.3833171718,3.74769415  
C,0.7311701211,-2.2787474138,2.3529668129  
C,1.8667671707,-1.6349875811,4.350950993  
C,3.3400833329,0.1700192176,3.9336041937  
C,3.8482080867,0.1414266491,5.1939199503  
H,3.6560320359,0.8753973586,3.1750427735  
H,4.5838601503,0.8738801893,5.5055312833  
N,2.3855082222,-0.7088946634,3.5266066051  
H,-0.1062638972,-2.3821629801,-1.7578431913  
H,4.5765007405,2.0994253477,-2.4953400417  
C,-1.1701125632,-3.9024502813,3.6641819996  
C,-2.2085110448,-4.6240355579,4.3012649261  
C,-2.4396657542,-4.4964053024,5.6445661706  
H,-3.2465442328,-5.0435723616,6.120730177  
C,-1.6439909303,-3.6102091253,6.3978690797  
H,-1.8607829578,-3.4536736213,7.4499846731  
C,-0.6080397876,-2.9270081247,5.8131364658  
H,-0.038480952,-2.2276386715,6.4110792878  
H,-2.8408350842,-5.2628010451,3.6910088489  
C,3.481689862,-0.9182331622,6.0581329337  
C,4.1118639662,-1.103694596,7.3129113813  
C,3.8605040228,-2.2223627695,8.0595031687  
H,4.3591945782,-2.3656223641,9.0126673127  
H,4.8229634313,-0.357079724,7.6523825158  
C,2.982908639,-3.214236139,7.571381323  
H,2.8351078283,-4.127899763,8.1371444118  
C,2.5151781329,-1.8605698661,5.6126100385  
C,2.3268150287,-3.0383682984,6.3822319034  
H,1.6760974925,-3.8164910556,6.0094918761

## 2a-3 (So)

### (CAM-B3LYP/6-31G(d,p) for C, H, N, and O and CAM-B3LYP/LanL2DZ for Pt)

-1588.9180612 hartree  
C,3.3426643519,-0.8602899826,-2.6453147301  
C,2.7561800211,-1.0047749471,-3.8910117306  
C,3.7528742717,-1.4589661106,-4.7814364403  
C,4.9217880554,-1.5783753707,-4.0592479237  
N,4.6592936001,-1.2171937791,-2.7771514792  
H,1.721716682,-0.8115516149,-4.133706786  
H,3.633092797,-1.6761972569,-5.832655024  
H,5.9085874631,-1.8907981346,-4.3660767551  
C,2.8496677936,-0.4328792324,-1.3346132224  
C,1.5149071513,-0.0209852812,-1.2189500726

C,0.8752030458,0.4320638805,-0.0605392259  
H,0.9164979529,-0.1006546766,-2.1161703553  
O,3.7131407621,-0.4745871883,-0.3932275326  
O,1.3799208402,0.5180582528,1.1145792138  
C,-0.5224860094,0.8593558719,-0.1316452463  
C,-1.4313096254,1.0254228434,0.8941521944  
N,-1.1789872808,1.1506910903,-1.3068233235  
C,-2.6582034153,1.4284498111,0.3220523989  
H,-1.218851731,0.8452636524,1.936805671  
C,-2.4658787005,1.508545024,-1.0386387596  
H,-3.5814444228,1.6351676455,0.8430282836  
H,-3.1415168386,1.796110991,-1.8301872829  
Pt,3.2742279115,0.0275102271,1.6360335602  
C,1.8657513688,1.1447657026,4.0431739463  
C,4.2287744345,1.0889869525,5.6001336209  
C,1.8496311188,1.6367887743,5.3162846201  
H,0.98970492,1.2091593115,3.4079242351  
H,0.9439428909,2.075872886,5.7268275516  
C,4.1619967691,0.4009825292,4.3363574025  
C,3.0374273955,0.5492969115,3.5186818645  
C,5.2163887538,-0.3991192,3.7033068892  
C,6.0218552452,-1.0811791405,1.588360204  
C,7.144807377,-1.6406814432,2.1101224276  
H,5.7989162884,-1.066563949,0.5296393522  
H,7.8980735449,-2.0728063762,1.461512829  
N,5.0779777334,-0.4927544368,2.368637638  
H,-0.7383587188,1.2100516477,-2.2095234844  
H,5.2989217623,-1.185719421,-1.9999144797  
C,3.0304325,1.6696911837,6.1051928766  
C,3.0429733151,2.3412211315,7.3514113886  
C,4.2053800898,2.5094905687,8.055280509  
H,4.2057260902,3.0370562181,9.0033781276  
C,5.4128610874,2.0275706971,7.5126361157  
H,6.3483823821,2.2125370098,8.0313983236  
C,5.4239266813,1.3418690364,6.3241542961  
H,6.3724623304,1.0167255328,5.9172036944  
H,2.1079408703,2.7488874118,7.7252069282  
C,7.2666645281,-1.7430933385,3.5173805163  
C,8.3184633582,-2.4745192982,4.120255218  
C,8.3259558354,-2.6975341154,5.4704799489  
H,9.12672768,-3.2728189644,5.9238425441  
H,9.0985283745,-2.8829297129,3.4853510532  
C,7.2690333037,-2.2152531049,6.2715278806  
H,7.2470921068,-2.4475639416,7.3308666088  
C,6.2580173844,-1.1628901617,4.3332594633  
C,6.2633806804,-1.4669493829,5.7193682779  
H,5.4482876323,-1.1227370629,6.3399607704

#### 2a-4 (So)

(CAM-B3LYP/6-31G(d,p) for C, H, N, and O and CAM-B3LYP/LanL2DZ for Pt)

-1588.9130576 hartree

C,1.8439441189,1.297348597,2.6147723324  
C,0.6776192018,1.4169580126,3.3422178397  
C,0.9860610274,2.0905764837,4.545622679  
C,2.3364054972,2.3548611454,4.5291081373  
N,2.8451943645,1.8892248272,3.3531187083  
H,-0.290196892,1.0732850587,3.0102726593  
H,0.299871595,2.3565649587,5.3361820651  
H,2.9705551847,2.8300750126,5.2624593397

C,2.0450561266,0.6956964934,1.2930885011  
C,3.1923827233,1.0358173832,0.5533564234  
C,3.5651281374,0.5254476052,-0.6968366226  
H,3.8592486369,1.765346676,0.9942892276  
O,1.126329062,-0.0977924598,0.9156835703  
O,2.9621382818,-0.3804416303,-1.3707619665  
C,4.776824958,1.0331484455,-1.3442193706  
C,5.5395230547,0.4501046886,-2.3350331198  
N,5.3810620755,2.2264300337,-1.0138800943  
C,6.6226432317,1.3153071126,-2.6102714502  
H,5.3347773313,-0.5113662878,-2.7806594542  
C,6.4874775847,2.41113786,-1.7893440859  
H,7.4153999928,1.1560779568,-3.3263200675  
H,7.0864794998,3.305258481,-1.7027137448  
Pt,1.2025388025,-1.2550264839,-0.8649874996  
C,1.9986383532,-2.269520405,-3.581722154  
C,-0.4494290972,-3.6506119373,-3.9085200583  
C,1.7398079611,-2.9195104777,-4.7539228925  
H,2.9029437537,-1.6846515056,-3.4555958004  
H,2.4537554836,-2.8868826461,-5.5729972484  
C,-0.0635258162,-3.1297711726,-2.6225897307  
C,1.0810696263,-2.3347805048,-2.5064475062  
C,-0.8061595354,-3.237731086,-1.3598584265  
C,-1.1482846765,-2.1240422535,0.7010804367  
C,-2.1552417909,-2.9595382685,1.0692227521  
H,-0.8019773576,-1.2982853487,1.3103956372  
H,-2.6908587581,-2.798180932,1.9975850084  
N,-0.4863323292,-2.2753492613,-0.4769664386  
H,4.9731717686,2.9253160973,-0.4153793663  
H,3.8247884498,1.8427009627,3.1267185331  
C,0.500008907,-3.5785376229,-4.9679940096  
C,0.171817083,-4.0941513412,-6.2450936011  
C,-1.0732725994,-4.5993882757,-6.5081017727  
H,-1.3180416429,-4.9801041194,-7.4942130729  
C,-2.051208256,-4.5790673008,-5.4940120453  
H,-3.0597171591,-4.9170987155,-5.7112556794  
C,-1.7494380996,-4.1186295395,-4.2372782303  
H,-2.5327436945,-4.0827018228,-3.4915308176  
H,0.9261760335,-4.0522655682,-7.0257760246  
C,-2.4233632847,-4.1015372593,0.2763479457  
C,-3.3310127475,-5.1027161528,0.7002493761  
C,-3.4529429957,-6.2728138215,0.0014805285  
H,-4.138687713,-7.0422463321,0.341367413  
H,-3.9010935597,-4.9360597073,1.608890313  
C,-2.6553471309,-6.499547468,-1.1406810392  
H,-2.7099878384,-7.4531517067,-1.6548567249  
C,-1.6984738036,-4.2794596279,-0.9333646321  
C,-1.8028701796,-5.5297093716,-1.597127296  
H,-1.1810741807,-5.7248457273,-2.4592842929

#### 2a (Si)

(CAM-B3LYP/6-31G(d,p) for C, H, N, and O and CAM-B3LYP/LanL2DZ for Pt)

-1588.82178332 hartree

C,4.0551225089,2.3779585265,-0.1477386572  
C,5.4262832566,2.5650162207,-0.2114735906  
C,5.6644208936,3.9546258879,-0.2446571232  
C,4.4355657924,4.5813935872,-0.1974913982  
N,3.477889204,3.6221614424,-0.1436919096  
H,6.1726686618,1.7850790516,-0.2411814904

H,6.6242391921,4.446895188,-0.2983407379  
H,4.1822510144,5.630880717,-0.1973951019  
C,3.1996117976,1.1971020773,-0.0893014075  
C,3.7926385435,-0.0658464966,0.014645865  
C,3.1341855987,-1.2935866664,0.0901409015  
H,4.8727502916,-0.0960989027,0.0291435536  
O,1.9412887493,1.4454393048,-0.1401941188  
O,1.8622268253,-1.4974960651,0.1046745617  
C,3.9205886014,-2.5209350752,0.155005775  
C,5.2765279633,-2.7831546221,0.2600384111  
N,3.2767368891,-3.7311194326,0.1087950044  
C,5.4376321591,-4.1843275864,0.2753622472  
H,6.0624039327,-2.0457138637,0.3296523589  
C,4.1791505282,-4.7419764991,0.1758186008  
H,6.3670714919,-4.7290246727,0.352111404  
H,3.8695191514,-5.7758406443,0.1475100289  
Pt,0.4307708594,-0.0372361862,-0.0148761497  
C,-0.9432693565,-2.652974705,0.4477015519  
C,-3.4535148731,-1.5504411885,-0.3060043551  
C,-2.0499487931,-3.4559967189,0.4145968472  
H,0.0327597731,-3.0588487279,0.6874277172  
H,-1.97618833,-4.5152744007,0.6428291707  
C,-2.3457904089,-0.6758205828,-0.0184957682  
C,-1.0414091115,-1.2742781467,0.1703858332  
C,-2.3408894643,0.7535259777,0.0287923611  
C,-0.8742165222,2.5842059483,-0.383328363  
C,-1.9012479441,3.4779839379,-0.3523770215  
H,0.1470575499,2.8731032074,-0.5979612192  
H,-1.7145871759,4.5234463148,-0.5698595326  
N,-1.0518447074,1.2665124184,-0.1411448124  
H,2.2763542067,-3.8001162587,0.0079959954  
H,2.4802424205,3.7477267417,-0.0812323888  
C,-3.3095780436,-2.9422606038,-0.023764868  
C,-4.3989386592,-3.8011084572,-0.2457613783  
C,-5.5743336156,-3.3358018025,-0.8018719762  
H,-6.3992813213,-4.0185297123,-0.9779406824  
C,-5.6866810671,-1.9891635762,-1.1702387672  
H,-6.5884488102,-1.6307322613,-1.6550604261  
C,-4.6453482798,-1.1172786272,-0.9269633956  
H,-4.7344912642,-0.0827536169,-1.2317888171  
H,-4.2924942212,-4.8527867174,0.0036190621  
C,-3.1991119595,3.0604628444,0.0784244165  
C,-4.2329373654,3.9789261886,0.3149248398  
C,-5.4432515642,3.5673562838,0.8411353837  
H,-6.2335502624,4.2879654553,1.0234089897  
H,-4.0566535853,5.0278837926,0.0959877115  
C,-5.6289693464,2.2212387922,1.1667754545  
H,-6.5585291773,1.8968873621,1.6234515872  
C,-3.4120774252,1.6725059502,0.3288383029  
C,-4.6322494058,1.2931858654,0.9234170334  
H,-4.7889517956,0.260968733,1.2069144865

## 2a (Ti)

(CAM-B3LYP/6-31G(d,p) for C, H, N, and O and CAM-B3LYP/LanL2DZ for Pt)

-1588.8520616 hartree

C,4.0962892947,2.3912789216,-0.1015013296  
C,5.4657127224,2.5705686581,-0.1967510419  
C,5.7140530277,3.959944434,-0.1926371299  
C,4.4928039263,4.5934041116,-0.0919488857

N,3.5293119686,3.6382505814,-0.0423863696  
H,6.2048644853,1.7867947361,-0.2715865646  
H,6.6761135896,4.4466399506,-0.2572463843  
H,4.2474717492,5.6440135727,-0.0515111663  
C,3.2300188692,1.2140309284,-0.0568395612  
C,3.8194589797,-0.0550598797,-0.003073516  
C,3.1572567697,-1.2803414947,0.064825265  
H,4.8995375047,-0.090858433,-0.0156323339  
O,1.9753929819,1.4695472904,-0.068320519  
O,1.8856276459,-1.48053907,0.1053742576  
C,3.9381228728,-2.5146321062,0.090714004  
C,5.2933050672,-2.7895967462,0.1575142668  
N,3.2824275547,-3.7177824451,0.041071405  
C,5.4421583564,-4.1929602627,0.1461026801  
H,6.0871741871,-2.0599386131,0.21848173  
C,4.1769416165,-4.7380123855,0.0697295155  
H,6.3684312034,-4.7467352378,0.1902072689  
H,3.8569903589,-5.7684694305,0.0332021953  
Pt,0.461463183,-0.0285515664,0.0322588297  
C,-0.9596356359,-2.629008229,0.5182213049  
C,-3.4753425237,-1.5539772056,-0.2828400944  
C,-2.0917157133,-3.4241955892,0.552965743  
H,0.0079177355,-3.0491114059,0.7715231029  
H,-2.0290681137,-4.4682325029,0.8436780622  
C,-2.3429941828,-0.6651969572,-0.0160047888  
C,-1.0220396282,-1.2837232413,0.1708519512  
C,-2.3448411551,0.7245194973,0.0677474752  
C,-0.8755916598,2.5618995587,-0.3321571883  
C,-1.9249557121,3.4528082317,-0.3781454303  
H,0.1506251974,2.862979808,-0.5052592733  
H,-1.7383974452,4.4926928539,-0.6200656267  
N,-1.0447737921,1.2659109512,-0.0620400667  
H,2.2786047507,-3.7737649411,-0.0318799594  
H,2.5348667868,3.7664341729,0.0526229119  
C,-3.3499862392,-2.9226980488,0.0758098484  
C,-4.4391566448,-3.7827930532,-0.1289191801  
C,-5.5963357319,-3.3367336311,-0.743022718  
H,-6.4232696941,-4.0210369151,-0.9039832483  
C,-5.6829877676,-2.0166374574,-1.1853134413  
H,-6.5672649876,-1.6718780813,-1.7105972394  
C,-4.6317146295,-1.1423255188,-0.9569816931  
H,-4.7031555851,-0.1221918993,-1.3135004825  
H,-4.3489273833,-4.8212777385,0.1757983998  
C,-3.2327685551,3.0330754728,0.018899908  
C,-4.2739679246,3.9569463605,0.2069953497  
C,-5.4896122528,3.5549330335,0.7233200487  
H,-6.2871622871,4.2755668844,0.8700073017  
H,-4.0973515614,4.9997179913,-0.0392239887  
C,-5.6724226557,2.2183211915,1.0853995098  
H,-6.6085108064,1.9006874661,1.5329378296  
C,-3.4425157965,1.6590403308,0.3068867606  
C,-4.6642321216,1.2895523365,0.887078281  
H,-4.8230701992,0.2626157608,1.188534015

## 2a·Cl (So)

(CAM-B3LYP/6-31G(d,p) for C, H, N, O, and Cl and CAM-B3LYP/LanL2DZ for Pt)

-2049.2355085 hartree

C,1.5453760783,1.0299567796,2.4160603382  
C,0.4733107854,0.8581004511,3.2799487314

C,0.6729711708,1.7126469028,4.3808875061  
C,1.8635778549,2.3806466232,4.153851808  
N,2.3807246868,1.9676445542,2.9756781429  
H,-0.3525547859,0.1836643463,3.1097022763  
H,0.029435438,1.8330014625,5.2411327406  
H,2.3810878143,3.1209281648,4.7461702119  
C,1.7894055876,0.3656914966,1.1379679324  
C,2.9366878733,0.694660756,0.4066887396  
C,3.3378626855,0.1741775835,-0.8230576392  
H,3.587929737,1.4365809402,0.84452506  
O,0.8987543575,-0.4916219968,0.7869080248  
O,2.7175389592,-0.7133761191,-1.532400758  
C,4.5827048658,0.6446126839,-1.4237933014  
C,5.153008677,0.2608956661,-2.6288537341  
N,5.4113998768,1.5819422375,-0.8531221514  
C,6.3501459775,0.9860361772,-2.7817921004  
H,4.7296637778,-0.466089268,-3.3053831731  
C,6.4731979427,1.7908764024,-1.6629762753  
H,7.0457257686,0.9329146024,-3.6075712714  
H,7.2402524239,2.498067224,-1.3833891179  
Pt,0.9855072364,-1.5891905684,-0.9970932772  
C,1.7406733624,-2.5846595413,-3.7386717794  
C,-0.7074076125,-3.9715971079,-4.0359546889  
C,1.4687392579,-3.2287618027,-4.9089695641  
H,2.6461127409,-2.0006269107,-3.6138310358  
H,2.1715319809,-3.191879671,-5.7379942398  
C,-0.3043435741,-3.457465381,-2.7516820944  
C,0.8386444399,-2.6530659372,-2.6458136922  
C,-1.0279824103,-3.577722569,-1.4802154378  
C,-1.3383214162,-2.4841332104,0.5968471422  
C,-2.3428738895,-3.3205838931,0.9718995793  
H,-0.976074705,-1.6617475709,1.2033799998  
H,-2.8649700688,-3.1662798061,1.909306231  
N,-0.6927379074,-2.6270047886,-0.5903189436  
H,5.2836063319,2.0727830711,0.049311887  
H,3.2733202476,2.3281443965,2.5924635659  
C,0.225177715,-3.889696831,-5.1101128511  
C,-0.1216046499,-4.3968270197,-6.3842963935  
C,-1.3694992128,-4.9052632531,-6.6343916339  
H,-1.6268128094,-5.2795604217,-7.620246193  
C,-2.3313944702,-4.8947411502,-5.606064226  
H,-3.3427789838,-5.2344332885,-5.8089569006  
C,-2.010524867,-4.440270407,-4.3509172217  
H,-2.7824721783,-4.4104874063,-3.5928960897  
H,0.621504981,-4.3461724989,-7.1757171434  
C,-2.6227094211,-4.4558967454,0.1734124368  
C,-3.5239599042,-5.4619035996,0.6013349733  
C,-3.65751938,-6.6267638667,-0.1043201194  
H,-4.3384271895,-7.3989059633,0.2403325092  
H,-4.0796391986,-5.302164623,1.5204586425  
C,-2.8769350066,-6.8437156623,-1.2597295942  
H,-2.9381902186,-7.7928877865,-1.7819377912  
C,-1.9163461944,-4.6235036597,-1.0485054135  
C,-2.0306112931,-5.8689596557,-1.7187622684  
H,-1.4200615487,-6.0560264261,-2.5908728945  
Cl,5.1217900433,3.1486353749,1.9001200503

## 2a·Cl<sup>-</sup> (Si)

(CAM-B3LYP/6-31G(d,p) for C, H, N, O, and Cl and CAM-B3LYP/LanL2DZ for Pt)

-2049.13844331 hartree  
C,3.5657211393,2.4149198474,-0.240901042  
C,3.1650797509,3.7400960635,-0.3588810441  
C,4.3261959487,4.5289163891,-0.4334224904  
C,5.4027823212,3.6599525469,-0.3593888127  
N,4.9411642648,2.3965938044,-0.2439830747  
H,2.1381264638,4.0724230236,-0.3806832564  
H,4.3817688393,5.6040532557,-0.5289905726  
H,6.465508006,3.8519786881,-0.3807451784  
C,2.7281563344,1.2297278222,-0.1293870179  
C,3.3286860795,-0.0225028688,0.0209779538  
C,2.6975131274,-1.2643406607,0.1192439388  
H,4.4081279567,-0.034311079,0.053141625  
O,1.4570553037,1.4546052258,-0.1859130164  
O,1.4227757438,-1.4897687534,0.1199210967  
C,3.5097384158,-2.466305202,0.2321203201  
C,3.0819021682,-3.7833763481,0.3509064803  
N,4.8855407193,-2.4760687689,0.2343742446  
C,4.2263105056,-4.5951272013,0.4266803411  
H,2.0481270982,-4.0932902744,0.3745225532  
C,5.3207481163,-3.7481699846,0.3506401554  
H,4.2600383949,-5.6709207066,0.5248036345  
H,6.3793493626,-3.9618967962,0.3705410967  
Pt,0.0127283769,-0.036422516,-0.0336669151  
C,-1.3404145524,-2.6774939103,0.3559096442  
C,-3.8617813898,-1.5661081005,-0.3370570128  
C,-2.4397931822,-3.4888463696,0.2995006261  
H,-0.3521322635,-3.0788955482,0.5509791381  
H,-2.3543574292,-4.5570414731,0.4778191149  
C,-2.7571157653,-0.6917800196,-0.0323916524  
C,-1.4568090281,-1.2875538639,0.1414906751  
C,-2.7592836143,0.742046707,0.0334382198  
C,-1.2961799808,2.5954779418,-0.3111323677  
C,-2.3252529689,3.4845848836,-0.244784977  
H,-0.2696356227,2.8918241568,-0.4927467471  
H,-2.1385784997,4.5399582879,-0.4078693673  
N,-1.4770599756,1.2678906963,-0.1333017657  
H,5.5249372285,-1.66388608,0.1533603495  
H,5.5623927631,1.5698793755,-0.1733371556  
C,-3.7056262185,-2.9668197377,-0.1046611657  
C,-4.7951569976,-3.8255935137,-0.3488516858  
C,-5.9751932245,-3.3527637937,-0.8792105097  
H,-6.797355547,-4.0350972834,-1.0727633461  
C,-6.0983439116,-1.9926633014,-1.2037438418  
H,-7.0052831938,-1.6244011159,-1.6724337321  
C,-5.0623591661,-1.1245980795,-0.9392338707  
H,-5.1592639175,-0.0813653226,-1.2103289254  
H,-4.6760052562,-4.884673844,-0.1376002575  
C,-3.6233661479,3.0449099246,0.1659275982  
C,-4.6620878048,3.9489212929,0.4345197828  
C,-5.873067678,3.5167175822,0.9461627148  
H,-6.6657804519,4.2291941558,1.1518079158  
H,-4.4877919921,5.0057569821,0.2530734877  
C,-6.053024778,2.1605539233,1.2264668917  
H,-6.9810522776,1.8154936642,1.6721373582  
C,-3.831720358,1.6471694127,0.3662416214  
C,-5.0508844202,1.2462814669,0.9520651538  
H,-5.2020468646,0.2047446084,1.2022654783  
Cl,6.9224240493,-0.0651202118,-0.0065574096



**2a·Cl<sup>-</sup> (T<sub>1</sub>)****(CAM-B3LYP/6-31G(d,p) for C, H, N, O, and Cl and CAM-B3LYP/LanL2DZ for Pt)**

-2049.164205 hartree

C,3.601306956,2.4382122669,-0.1941465102  
C,3.2040845993,3.7645439848,-0.2917490473  
C,4.3678142911,4.5527513788,-0.3622628007  
C,5.4417062108,3.6809024981,-0.3056456811  
N,4.9762036136,2.4167609089,-0.2047843741  
H,2.1777825969,4.0997760527,-0.3037746544  
H,4.4253815896,5.6291077564,-0.4440741771  
H,6.5049928431,3.8694521807,-0.3296257404  
C,2.7577177116,1.2511517836,-0.0938468668  
C,3.3624077495,-0.0066433648,0.0172936111  
C,2.7348246266,-1.2479727203,0.1167695642  
H,4.4422350924,-0.0191044461,0.0225142884  
O,1.492025736,1.4769704471,-0.1187188464  
O,1.4607213938,-1.477442504,0.1388579751  
C,3.5513361753,-2.4536044986,0.2085466293  
C,3.1264706641,-3.7709390091,0.308906814  
N,4.9265389852,-2.4607082165,0.2064400551  
C,4.2742266505,-4.5833705739,0.3685267949  
H,2.0931607426,-4.0827656163,0.3302972744  
C,5.3658596283,-3.7349761449,0.3021598242  
H,4.3093232438,-5.6607271826,0.4496643808  
H,6.425080827,-3.9460598944,0.3155486991  
Pt,0.0460900982,-0.0401942437,0.0171558825  
C,-1.3394527303,-2.6803982127,0.3763914228  
C,-3.8799708422,-1.5859417844,-0.3044286071  
C,-2.4547918747,-3.4869171332,0.3794582426  
H,-0.3547577637,-3.0928964593,0.5692698661  
H,-2.3736922952,-4.5483312775,0.595107345  
C,-2.7486065113,-0.6986367548,-0.0349494013  
C,-1.4295195824,-1.3075495121,0.1209541746  
C,-2.7600115507,0.6943065283,0.0686787801  
C,-1.2925691875,2.5499373146,-0.3085079741  
C,-2.3498520006,3.4345769966,-0.319513414  
H,-0.2649870847,2.8582008482,-0.4699534404  
H,-2.1707766351,4.482309494,-0.5320220914  
N,-1.4563446938,1.2485171869,-0.0685476421  
H,5.5630078505,-1.6467728235,0.1380677041  
H,5.5963888819,1.5887410681,-0.1452313131  
C,-3.7297523918,-2.9715602504,-0.0262318483  
C,-4.820379422,-3.8330605181,-0.2419111802  
C,-6.0000736927,-3.3712645239,-0.7895756452  
H,-6.8254904188,-4.0558370653,-0.9603599125  
C,-6.1142089044,-2.0271301592,-1.1582661739  
H,-7.0184875363,-1.6656613119,-1.6372022429  
C,-5.0664961672,-1.156498275,-0.9199802394  
H,-5.1585016455,-0.1211429488,-1.2232241234  
H,-4.7055227035,-4.8855506915,0.0016548486  
C,-3.6516666449,3.0014641635,0.0980234988  
C,-4.6879847616,3.9156322545,0.3319015825  
C,-5.8956673694,3.5010739881,0.8675032829  
H,-6.6901264275,4.2185138836,1.0464068796  
H,-4.5174620556,4.9643741623,0.1059466114  
C,-6.0670912368,2.1597784802,1.2035974916  
H,-6.9923566398,1.8274529322,1.663900503  
C,-3.8520755898,1.6193160246,0.3597886278  
C,-5.0577472054,1.2377333263,0.9629152789

H,-5.2062754651,0.2040101757,1.2466464422  
Cl,6.9725192722,-0.0389849686,-0.0091734279

**3a-1 (S<sub>0</sub>)****(CAM-B3LYP/6-31G(d,p) for C, H, N, and O and CAM-B3LYP/LanL2DZ for Pt)**

-1819.8359884 hartree

C,-3.0849687355,-1.9226102768,-2.9551934013  
C,-3.2380902139,-2.6651989149,-4.1133066779  
C,-4.6228158528,-2.8165747614,-4.3416640776  
C,-5.2795895188,-2.1664540462,-3.3177651855  
N,-4.3426381595,-1.6303293881,-2.4941330081  
H,-2.4400154888,-3.0472110885,-4.7324943953  
H,-5.0909833043,-3.3401522152,-5.1622128834  
H,-6.3349035178,-2.0511896763,-3.1212356688  
C,-1.9229996849,-1.4394615111,-2.2098612798  
C,-0.64545085,-1.8436438991,-2.6161358655  
C,0.5645833685,-1.515362103,-2.0066662885  
H,-0.5927020752,-2.5105402758,-3.4648687578  
O,-2.1974655815,-0.6811127951,-1.2157001636  
C,1.8064074862,-2.066665108,-2.5440142684  
C,2.1105008861,-2.8239217662,-3.662256335  
N,2.9816640329,-1.8439522897,-1.8740381884  
C,3.5026844377,-3.0557156865,-3.651930932  
H,1.4085197927,-3.1631550929,-4.4095522476  
C,4.0118852164,-2.4378709773,-2.528523906  
H,4.0727119025,-3.6101851996,-4.3828299536  
H,5.0232283437,-2.3816282383,-2.1549670459  
Pt,-0.7270822182,0.1944237754,0.0453385413  
H,3.0127724326,-1.3263593226,-1.0099336728  
H,-4.4909640604,-1.1101142514,-1.6446590706  
C,-3.332859924,1.4304818199,0.7353675106  
C,-1.5050732704,2.0261825213,2.1054897561  
C,-4.1485736318,2.3640629065,1.29086375  
H,-3.6441691584,0.7565392705,-0.0519472247  
C,-2.2395457985,3.1625817607,2.5835017454  
C,-3.6000305789,3.3004067501,2.2018829195  
H,-5.1845703498,2.4429990691,0.9819104699  
C,-1.6402388095,4.2107470688,3.3261606832  
C,-4.3476823805,4.4072704797,2.6703110681  
C,-2.3737348207,5.2970690974,3.7235639807  
C,-3.7485005888,5.3838830756,3.4190332341  
H,-4.3225169628,6.2406008457,3.7572705793  
C,0.5062866478,1.0118391786,1.3489177967  
C,1.9188591981,0.9343346852,1.3236588073  
C,-0.1156502227,1.6689152985,2.4150533598  
C,2.6578365457,1.4605101282,2.3440875952  
H,2.4001261112,0.4926324825,0.4584801222  
C,0.6140625173,1.9346129303,3.6277332694  
C,2.0365658535,1.9273510965,3.5344466389  
H,3.7435734124,1.4706081484,2.2950019973  
C,0.0359600804,2.090747317,4.9329525348  
C,2.82303219,2.3193829725,4.6427778537  
C,0.8484822582,2.4574735501,5.9876691107  
C,2.2370051258,2.6253522852,5.8406825135  
H,2.8387667512,2.920084882,6.693930408  
N,-2.0376649011,1.2832600009,1.1226761631  
O,0.7414700579,-0.7668004933,-0.9727690274  
H,-1.8932426581,6.0986405392,4.2746050553  
H,0.4067739192,2.5493171322,6.9747406246



H,-5.3945664439,4.4831252458,2.3933552994  
C,-1.3712114942,1.7127277914,5.2452526561  
C,-2.1699727141,2.5126099879,6.0664096813  
C,-1.8925931482,0.4937919697,4.7978736352  
C,-3.4558535776,2.1187820657,6.4155644568  
H,-1.7850288248,3.4653537528,6.4151941731  
C,-3.1777764047,0.0986965525,5.1468557001  
H,-1.2798464378,-0.153779596,4.1796894832  
C,-3.9666411698,0.9110128785,5.9544509547  
H,-4.0619267109,2.7613788663,7.0465827348  
H,-3.5597382025,-0.8536056347,4.7925488506  
H,-4.9713700827,0.6027610083,6.2255607256  
H,-0.5862578863,4.1598301679,3.5605958323  
H,3.9028649176,2.3456806732,4.5291813425

### 3a-2 (S<sub>0</sub>)

#### (CAM-B3LYP/6-31G(d,p) for C, H, N, and O and CAM-B3LYP/LanL2DZ for Pt)

-1819.8316172 hartree  
C,4.3353093692,-2.6402484186,0.3369200263  
C,4.9750258691,-3.391866337,-0.6285792175  
C,5.5579711004,-4.5092330258,0.008461729  
N,4.5250845848,-3.2829351509,1.5403842439  
H,5.0235974009,-3.1332540885,-1.6751628945  
H,6.1386479079,-5.2930157694,-0.4552636144  
C,3.5993779621,-1.3834387314,0.1826640663  
C,3.2957745937,-0.6200162894,1.3231060878  
C,2.5656006108,0.5684721222,1.3615965509  
H,3.6804982664,-0.9625174211,2.2740265585  
O,3.2929853431,-1.0821106236,-1.0158754804  
C,2.32820098,1.2185795815,2.6499921194  
C,2.7547529867,0.9686566205,3.9430868379  
N,1.5213316457,2.3254140545,2.6976836897  
C,2.1839211726,1.9543088632,4.7767747201  
H,3.414810858,0.1718972681,4.2529595076  
C,1.4225033583,2.777648461,3.9735402805  
H,2.314297714,2.0552548202,5.8441958789  
H,0.8249957569,3.6424446656,4.219632726  
Pt,2.1984711637,0.6397496803,-1.5800623955  
H,1.0764466218,2.6950657913,1.8722406931  
H,4.0949132116,-3.013099942,2.4090715457  
C,3.1097111914,-0.7342215821,-4.0404579435  
C,1.7372212781,1.1634258094,-4.3549253322  
C,3.4064595964,-0.8252130505,-5.3636179795  
H,3.4797962364,-1.424117385,-3.2922069841  
C,2.1776096946,1.253325572,-5.7167930818  
C,2.9915580087,0.2118230841,-6.2351552932  
H,4.018818508,-1.6395902818,-5.7333537652  
C,1.931497476,2.3859830579,-6.5330038954  
C,3.4303920024,0.2744428594,-7.5797397082  
C,2.4125643707,2.4445297552,-7.8139120461  
C,3.1445498526,1.3659934323,-8.3542977134  
H,3.5025943372,1.4167831881,-9.3776078163  
C,1.1417391698,2.1538817261,-2.2760043113  
C,0.6370233011,3.2383100722,-1.5202981835  
C,0.8446670332,2.0852729938,-3.6406602323  
C,-0.1533153298,4.1833159876,-2.1092196293  
H,0.9285601126,3.3284924636,-0.4798716541  
C,-0.2278086465,2.8737938997,-4.1898057918  
C,-0.6422024967,4.0083773124,-3.432284851

H,-0.4810558784,5.0579263344,-1.5533128048  
C,-1.5848101564,4.9158454853,-3.9698675291  
C,-1.9069295798,3.4621409825,-5.8430516253  
C,-2.175738489,4.6727828153,-5.1795851477  
H,-2.9035486016,5.3642261628,-5.5910006543  
N,2.3158664973,0.2571357785,-3.5523604077  
O,2.0366623616,1.1934068235,0.3686888153  
H,2.231688265,3.3278420645,-8.4173739267  
H,-2.4912543978,3.1987457904,-6.7188743025  
H,4.0275477756,-0.5434257939,-7.9707873367  
H,1.3769616234,3.2211193954,-6.1282808324  
H,-1.8484898722,5.7946760349,-3.3886387653  
C,-0.9515117923,1.2057949149,-6.0073346695  
C,-0.9273365404,1.0665340355,-7.3973355668  
C,-1.0404653898,0.0479579252,-5.2268114366  
C,-0.9706857892,-0.1890127264,-7.9907524225  
H,-0.8488902287,1.9532512852,-8.0179086909  
C,-1.084171136,-1.2078416387,-5.8189311865  
H,-1.0851178521,0.1350252287,-4.1463733905  
C,-1.0459773795,-1.3322609199,-7.2036120154  
H,-0.9398556757,-0.2733438274,-9.0726025448  
H,-1.1565848812,-2.0922168003,-5.1937402674  
H,-1.0777683812,-2.3137332058,-7.6658695844  
C,-0.9850953178,2.5509157227,-5.3668916331  
C,5.2517906533,-4.4184954479,1.3476648626  
H,5.4910568987,-5.0746096446,2.1710933257

### 3a-3 (S<sub>0</sub>)

#### (CAM-B3LYP/6-31G(d,p) for C, H, N, and O and CAM-B3LYP/LanL2DZ for Pt)

-1819.8306187 hartree  
C,3.8253801464,-1.0598177117,-2.6998175464  
C,3.2429945515,-1.7728825253,-3.7335053838  
C,4.2175475661,-1.9334893386,-4.7422059569  
N,5.1179093888,-0.7955409133,-3.0712244434  
H,2.2306952882,-2.1486491804,-3.7560332692  
H,4.0963924649,-2.4462802243,-5.6850669307  
C,3.3495825117,-0.5822582651,-1.4001726643  
C,1.9989168023,-0.7568941208,-1.0697496427  
C,1.3625236169,-0.3421622598,0.1053095489  
H,1.4012151603,-1.2916160174,-1.7952116347  
O,4.2409574313,-0.025019611,-0.6731741689  
C,-0.0749883508,-0.5673606418,0.2613941306  
C,-0.8371640528,-0.5378088135,1.4120761674  
N,-0.9216916967,-0.8837903876,-0.7778952738  
C,-2.169800078,-0.8397555367,1.0547238842  
H,-0.4495491389,-0.3400862477,2.3996054378  
C,-2.1910637746,-1.0364718617,-0.3075289863  
H,-3.0204950589,-0.9087969573,1.7165920746  
H,-3.0088914278,-1.267131045,-0.9736305841  
Pt,3.8669176212,0.7083226565,1.292698756  
H,-0.6620690595,-0.8800473969,-1.7500379849  
H,5.7423467573,-0.2679619147,-2.4826630639  
C,6.8114311844,0.727258962,0.9179438195  
C,6.0106687665,1.6692543551,2.9284380812  
C,8.1052506553,0.7596573884,1.3312180279  
H,6.5031211501,0.3536310715,-0.0497768015  
C,7.3174287599,1.5355816207,3.5057606847  
C,8.3881549015,1.1173288211,2.6729345607  
H,8.9022615945,0.4390797249,0.6701645138

C,7.5649302637,1.6930327596,4.8924604737  
C,9.6874382301,0.9885411911,3.2194459188  
C,8.8220340051,1.5114073943,5.4051234705  
C,9.9011983662,1.1848666998,4.5571594213  
H,10.8961412623,1.0635981368,4.9734566479  
C,3.6433059817,1.5253842914,3.0717068344  
C,2.4307025554,1.5977400981,3.797104328  
C,4.7879617474,2.1380712827,3.5897661842  
C,2.3827848258,2.2711411343,4.9838245321  
H,1.5582095405,1.0873793982,3.4054253095  
C,4.6755639541,3.1015166034,4.6544922984  
C,3.4760689642,3.066949671,5.4239509369  
H,1.4764847367,2.2709174277,5.5838060429  
C,3.3488694896,3.8765392996,6.5767257334  
C,5.4329255709,4.932226629,6.0596124664  
C,4.3328326588,4.763644593,6.9191124633  
H,4.2343864456,5.3894611113,7.7998774554  
N,5.7904622843,1.1526766755,1.7089620852  
O,1.9053631619,0.2345231422,1.1131035613  
H,8.9890478753,1.6171570945,6.4718919796  
H,6.1301999559,5.7427159537,6.2463436801  
H,10.5016702016,0.6959940789,2.563763632  
H,6.7448543501,1.9378863489,5.5529398495  
H,2.4411255304,3.7975087978,7.1678196028  
C,6.6653704144,4.5761611875,3.9658205284  
C,7.9550506322,4.8955623808,4.3980522541  
C,6.3579209031,4.7519181239,2.6121300126  
C,8.914506042,5.3573699834,3.5054483548  
H,8.2135319112,4.7570973283,5.4428291228  
C,7.3160960267,5.2141137895,1.7189080421  
H,5.3550259356,4.5336418674,2.2606547237  
C,8.5999490291,5.5156466322,2.1607384978  
H,9.9130674644,5.5895264827,3.862483031  
H,7.0536336363,5.3477533889,0.6740963911  
H,9.3488681965,5.8752488145,1.4622689761  
C,5.6088309197,4.1576524391,4.9297762379  
C,5.3675707972,-1.3126936053,-4.3015140445  
H,6.3326025226,-1.2043716753,-4.7732189573

### 3a-4 (So)

#### (CAM-B3LYP/6-31G(d,p) for C, H, N, and O and CAM-B3LYP/LanL2DZ for Pt)

-1819.82547 hartree

C,3.8706014355,-1.0489654247,-2.6543787851  
C,3.7628879221,-0.4433314002,-3.8894165578  
C,4.4565344654,-1.2437327559,-4.8250213981  
N,4.6092327976,-2.1987631602,-2.829010433  
H,3.213296367,0.4657730468,-4.0804689861  
H,4.5598915819,-1.0632556424,-5.8849065109  
C,3.3076762596,-0.621865123,-1.3699069389  
C,3.1734229174,-1.5641784899,-0.3338130976  
C,2.704616124,-1.3230347149,0.9642748389  
H,3.463744535,-2.5819580364,-0.5600263885  
O,2.9681538603,0.6017373504,-1.3103626773  
C,2.5849375288,-2.4431766968,1.9004307842  
C,2.5234318392,-2.4189639177,3.2784939858  
N,2.5422033525,-3.7650296346,1.5141465646  
C,2.4364800667,-3.7553944311,3.7296783693  
H,2.5641853708,-1.522847957,3.8785779879  
C,2.4341399319,-4.5621996723,2.6151576503

H,2.3834485841,-4.0929455048,4.7542785231  
H,2.3574942708,-5.6351182151,2.5217898514  
Pt,2.2934888394,1.5649705131,0.4558725289  
H,2.4396511512,-4.0779204647,0.5630854634  
H,4.9520812762,-2.775757685,-2.0789761267  
C,2.7906157347,3.6527517666,-1.5860245077  
C,1.882174469,4.3947117823,0.4658480361  
C,3.0308519213,4.9188394796,-2.0178979969  
H,3.0188181971,2.7674298304,-2.1667514449  
C,2.302143286,5.7323900822,0.1643162827  
C,2.8437655738,5.9992837744,-1.120622379  
H,3.4367573884,5.0926348532,-3.0078271006  
C,2.3055147257,6.7730436406,1.1268866844  
C,3.2563075893,7.3147358927,-1.4428277669  
C,2.7595053442,8.0242827152,0.804504701  
C,3.2123414601,8.3073907466,-0.5015641272  
H,3.5503935106,9.3085313268,-0.7494289189  
C,1.5831335391,2.5882561057,1.9834565864  
C,1.3364099775,2.073610953,3.2780546163  
C,1.2442202674,3.9141364216,1.6980415975  
C,0.7622924211,2.8650067637,4.2312041297  
H,1.6374802698,1.0560636959,3.5007311287  
C,0.3634138618,4.6411935309,2.5752870791  
C,0.2284218626,4.1415164184,3.9037993604  
H,0.6361227449,2.5036253474,5.2485063756  
C,-0.4963132008,4.8788994081,4.8691497363  
C,-1.1726843786,6.4253633409,3.173360725  
C,-1.1489921923,6.0304947903,4.5228779188  
H,-1.7100017356,6.5943048002,5.2607950307  
N,2.2508661908,3.4045997935,-0.3618820191  
O,2.3648298823,-0.1948298349,1.4642342944  
H,2.7732001348,8.8034953028,1.5593402127  
H,-1.8185349826,7.2445439354,2.873736446  
H,3.6412098965,7.5101206129,-2.43889438  
H,1.9655962083,6.5662434056,2.1321473502  
H,-0.545399082,4.4955670084,5.884209564  
C,-0.7574662517,6.0956566835,0.7759449324  
C,-0.7947716739,7.4257429752,0.3498105013  
C,-1.0918859791,5.0957878063,-0.1439693028  
C,-1.1356114596,7.7482634405,-0.9579693824  
H,-0.529413323,8.2135534102,1.047291747  
C,-1.433140511,5.4169587296,-1.4516090495  
H,-1.0930644516,4.0583361415,0.1732772238  
C,-1.4531826717,6.7445406329,-1.8656849459  
H,-1.1474327529,8.7881972046,-1.2692810096  
H,-1.6926109088,4.6249010482,-2.1470413807  
H,-1.7176638955,6.9950198437,-2.8881081  
C,-0.471067282,5.7471069229,2.1961978509  
C,4.9816823585,-2.3125656689,-4.1355921897  
H,5.5927370397,-3.1366681739,-4.4721178974

### 3a (Si)

#### (CAM-B3LYP/6-31G(d,p) for C, H, N, and O and CAM-B3LYP/LanL2DZ for Pt)

-1819.73609357 hartree

C,4.3684156258,-2.6659039625,0.0923253608  
C,5.7080632246,-2.9756884923,0.2609006552  
C,5.8309682995,-4.3793141469,0.1985177417  
N,3.6975708729,-3.8513384474,-0.0670809477  
H,6.5086148924,-2.2680768123,0.4178098106

H,6.7394903924,-4.955496639,0.2938915482  
C,3.6191836379,-1.4131827022,0.0579436001  
C,4.3183932455,-0.2047247016,0.1555153011  
C,3.7725522498,1.0789931037,0.1415974335  
H,5.3911519398,-0.2712108648,0.2676659837  
O,2.3488025903,-1.5518574544,-0.059260156  
C,4.6527091649,2.2327733091,0.2974024844  
C,6.0266273797,2.3856815277,0.3785431738  
N,4.0991534209,3.4837394991,0.3958866724  
C,6.2915375961,3.763082557,0.5298189621  
H,6.7581999363,1.593112172,0.3241632178  
C,5.0752292944,4.4150084443,0.5407353073  
H,7.2610529103,4.2305043144,0.6195872934  
H,4.8418517902,5.464274544,0.6413891915  
Pt,0.9884842132,0.070591145,-0.1970343537  
H,3.1013557517,3.6268604212,0.384662324  
H,2.7024547032,-3.8852708263,-0.2196394515  
C,-0.5690461404,-2.4405973348,-0.4085056206  
C,-1.8176576639,-0.4283612791,-0.6133546321  
C,-1.656413966,-3.2061428644,-0.7003179351  
H,0.3968478279,-2.8635259937,-0.1626721801  
C,-2.9347058897,-1.1650550422,-1.1473082027  
C,-2.8649799971,-2.5874955863,-1.1476110876  
H,-1.5814717334,-4.2871233905,-0.6693424862  
C,-4.0630846142,-0.5575469646,-1.72994095  
C,-3.9480562391,-3.3369441419,-1.6332564297  
C,-5.106348794,-1.317943567,-2.2252377331  
C,-5.063141061,-2.7137502692,-2.1593774445  
H,-5.890718022,-3.3041729802,-2.5387586233  
C,-0.336024417,1.4582764131,-0.4346744163  
C,-0.1045254364,2.8200518473,-0.6956851405  
C,-1.6996081286,0.9741098373,-0.3697561617  
C,-1.1580050612,3.6923359146,-0.7979594754  
H,0.9159577619,3.1546878827,-0.8442296369  
C,-2.7393885866,1.9279320174,-0.0721669581  
C,-2.4805131149,3.2876169841,-0.4426694661  
H,-0.9952766663,4.7325479559,-1.064470417  
C,-3.5241397398,4.2235965768,-0.3958180798  
C,-4.9691716434,2.5939915744,0.6204809229  
C,-4.7661924688,3.870951179,0.09647479  
H,-5.5647113646,4.6045559387,0.138085364  
N,-0.6099795792,-1.0891081245,-0.4136411991  
O,2.53160076,1.3970386321,0.0112710986  
H,-5.9624071542,-0.8227330654,-2.6726118501  
H,-5.8989968443,2.3654061556,1.1295437507  
H,-3.8845008694,-4.4207676174,-1.6070915958  
H,-4.1101832171,0.5210156883,-1.8031554649  
H,-3.3338557653,5.2389530304,-0.7304211081  
C,-4.1863425083,0.3751395094,1.3507316222  
C,-5.4126211362,-0.2948364924,1.3037557618  
C,-3.1906789123,-0.1125752292,2.2049979551  
C,-5.6321101267,-1.430386226,2.0715512089  
H,-6.1881817305,0.060388406,0.6334481222  
C,-3.4124932811,-1.2449927614,2.9770393673  
H,-2.2436492284,0.4115334882,2.275777291  
C,-4.631852203,-1.9104213814,2.9100374167  
H,-6.5853297411,-1.9454799331,2.0095023354  
H,-2.6303429325,-1.6045451498,3.6378812313  
H,-4.803175466,-2.7975429563,3.5113615287  
C,-3.9693807437,1.6249506271,0.5821300963

C,4.5662181828,-4.8917071259,-0.0079838261  
H,4.230999123,-5.9122534198,-0.1161830452

**3a (T<sub>1</sub>)**  
**(CAM-B3LYP/6-31G(d,p) for C, H, N, and O and CAM-**  
**B3LYP/LanL2DZ for Pt)**

-1819.7675347 hartree  
C,4.3602082358,-2.6907401035,0.1335099562  
C,5.7010802181,-2.9949435707,0.2962494923  
C,5.8240343813,-4.4007964139,0.2779754387  
N,3.6885075339,-3.8803798331,0.0194347919  
H,6.5042447409,-2.2826364822,0.4132649243  
H,6.734390044,-4.9732162168,0.3789963925  
C,3.6083098046,-1.4376663703,0.0672268349  
C,4.3037353676,-0.2299650134,0.2077986109  
C,3.7598754395,1.0536050302,0.1843431273  
H,5.3697239474,-0.2983784647,0.3719737765  
O,2.3475391306,-1.5741138985,-0.1106266302  
C,4.6324373809,2.2083838566,0.3818492244  
C,5.9996515819,2.3645683628,0.5321206689  
N,4.0713589258,3.4576285478,0.4478313473  
C,6.2531011561,3.7437933398,0.6919956136  
H,6.7346585137,1.5733517954,0.5199089994  
C,5.0364467654,4.3925466516,0.6377263654  
H,7.2155982742,4.213978393,0.8304244237  
H,4.795533266,5.4416254269,0.7211166634  
Pt,0.9983277597,0.070676315,-0.2836953629  
H,3.0748205824,3.5952771403,0.3781514539  
H,2.6901296119,-3.9181974091,-0.1058828847  
C,-0.5679666616,-2.405458756,-0.6660617566  
C,-1.8292156015,-0.3914816351,-0.7501998102  
C,-1.6707884404,-3.1752534325,-0.9287328069  
H,0.4133898173,-2.8280141102,-0.4910829639  
C,-2.9847765708,-1.1347831244,-1.2239774072  
C,-2.90561743,-2.5499865171,-1.2701089749  
H,-1.5851946456,-4.2555681275,-0.9469952961  
C,-4.1466364958,-0.5183080553,-1.7199764357  
C,-4.0125234563,-3.2988782409,-1.7143749544  
C,-5.2098922861,-1.2701560659,-2.1768819045  
C,-5.1545809203,-2.6701668178,-2.1554324578  
H,-5.9996240141,-3.2539848236,-2.5053100856  
C,-0.3291636667,1.4789248898,-0.5108871905  
C,-0.1558404287,2.7962151251,-0.8852517738  
C,-1.7151193949,0.9683046493,-0.442194526  
C,-1.2509335954,3.6478326791,-1.0453224176  
H,0.8484866098,3.1633348984,-1.0708870636  
C,-2.7733261337,1.9296500348,-0.1191830052  
C,-2.5575309577,3.2595698272,-0.5857649201  
H,-1.112664441,4.6682611972,-1.3883623745  
C,-3.5968487274,4.1910685499,-0.4942991087  
C,-4.9347533982,2.6121243048,0.7281528645  
C,-4.7880107457,3.8575277926,0.1340561798  
H,-5.585533374,4.589871282,0.2098578018  
N,-0.61900096569,-1.0649079339,-0.6130250875  
O,2.5252886919,1.3755594141,0.0124487491  
H,-6.0932189672,-0.7696249439,-2.5600193707  
H,-5.8217785218,2.3901718785,1.3112137008  
H,-3.9389016522,-4.3821493348,-1.7246267927  
H,-4.2049167094,0.5613602616,-1.7546762888  
H,-3.4473552995,5.1898243922,-0.8930514841

C,-4.088305478,0.3912685283,1.4214186489  
C,-5.3000245302,-0.304753997,1.4229507696  
C,-3.0502543133,-0.0728145927,2.236447824  
C,-5.4647787406,-1.4443131552,2.2002382024  
H,-6.1114397039,0.0372253802,0.7888313481  
C,-3.2155828525,-1.210129711,3.0156312523  
H,-2.1126369496,0.4722486772,2.2696961707  
C,-4.4222842004,-1.9020574912,2.9977028155  
H,-6.4098430139,-1.9776746193,2.1792252306  
H,-2.4004636296,-1.5509082524,3.64599343  
H,-4.5507859233,-2.790996972,3.6070178784  
C,-3.9269456939,1.6421309202,0.6357823484  
C,4.557707645,-4.9196884996,0.10522258  
H,4.2207077963,-5.9431935562,0.0383162644

### 3a·Cl<sup>-</sup> (S<sub>0</sub>)

(CAM-B3LYP/6-31G(d,p) for C, H, N, O, and Cl and CAM-B3LYP/LanL2DZ for Pt)

-2280.148028 hartree  
C,3.5928003288,2.4559748169,-0.3095660585  
C,3.2104502429,3.7736708552,-0.5160634343  
C,4.3829818671,4.5487220557,-0.5977653736  
C,5.4464504424,3.6777280769,-0.4371544893  
N,4.96660998,2.4260774032,-0.2660181764  
H,2.1884906874,4.1116446648,-0.6015256697  
H,4.4523908334,5.6159153512,-0.7556559911  
H,6.5113686648,3.8582607064,-0.4314102256  
C,2.7370088372,1.2812573182,-0.1626588625  
C,3.3284109354,0.0210518958,-0.0149804753  
C,2.6854480221,-1.2049278566,0.1517205556  
H,4.4079420774,-0.0062363982,-0.0291150652  
O,1.4739907183,1.517867836,-0.184104007  
O,1.4087658377,-1.4165749254,0.1832625426  
C,3.4876093008,-2.4145119065,0.3103056366  
C,3.0489498182,-3.7242923175,0.4393748057  
N,4.8618654462,-2.4314732421,0.3535140489  
C,4.1878590231,-4.5429875688,0.5621344631  
H,2.0131253321,-4.0284816271,0.4359987642  
C,5.2877403475,-3.7052898779,0.5053064833  
H,4.2112300345,-5.6174898574,0.6782138045  
H,6.3441475124,-3.9229070024,0.5627801406  
Pt,0.0167525417,0.0278414463,0.0139475812  
C,-1.4067944941,-2.6288667583,0.3023852235  
C,-3.8851661984,-1.4803538359,-0.4514546287  
C,-2.5288004565,-3.403471334,0.2736033452  
H,-0.4302819507,-3.0536806409,0.5084849366  
H,-2.4760704163,-4.4660739482,0.4980474234  
C,-2.7603625553,-0.6524333568,-0.0984610647  
C,-1.4988807194,-1.2271175198,0.1064375443  
C,-2.7408523635,0.8034126213,0.0860593349  
C,-1.3056083856,2.6804918089,0.0243909447  
C,-2.3194225482,3.5533759225,0.2677874345  
H,-0.272617324,2.9756987586,-0.1207289362  
H,-2.1310695867,4.6207848013,0.2884271804  
N,-1.5164542705,1.338678939,-0.0385442516  
H,5.5060452236,-1.6234357421,0.2910007899  
H,5.5765475075,1.6012627426,-0.1203483564  
C,-3.7811397939,-2.8691575168,-0.1432673203  
C,-4.8950702362,-3.7203807111,-0.3212262586  
C,-6.0566784856,-3.2504719875,-0.8738280871

H,-6.9097047312,-3.9061898367,-1.0164345652  
C,-6.0991377509,-1.9298460906,-1.352655412  
H,-6.9568145798,-1.6040755597,-1.9329447339  
C,-5.0413486827,-1.0554081081,-1.1904031113  
H,-4.798515919,-4.7639812174,-0.0347339749  
C,-3.5996986031,3.0449662945,0.5993195637  
C,-4.6439246354,3.8895061748,1.0490068836  
C,-5.8182584429,3.3610259009,1.512896201  
H,-6.6052857908,4.0154105864,1.8750694985  
H,-4.4784148054,4.9626951388,1.0510574418  
C,-5.9948836404,1.9619388153,1.5539080747  
H,-6.9075636943,1.5456826238,1.9680917496  
C,-3.8090900485,1.6415646997,0.5536414711  
C,-5.0201408123,1.1249534776,1.0781415764  
H,-5.1626240311,0.0539666506,1.1207948492  
Cl,6.9345837479,-0.028722188,0.1412038146  
C,-5.0917215464,0.2272348202,-1.9477050872  
C,-4.0142311309,0.6185630059,-2.750335545  
C,-6.242499782,1.0198221119,-1.9553028695  
C,-4.0817556865,1.7727903539,-3.5199374689  
H,-3.1172647838,0.0090120194,-2.772273522  
C,-6.3116732828,2.174469501,-2.7251564229  
H,-7.0822944585,0.7391188076,-1.3279190379  
C,-5.2299402214,2.5578199988,-3.5093003812  
H,-3.2323469276,2.0559536385,-4.1336303092  
H,-7.2121953244,2.7809647522,-2.7044450791  
H,-5.2800308134,3.4623852491,-4.1074491254

### 3a·Cl<sup>-</sup> (S<sub>1</sub>)

(CAM-B3LYP/6-31G(d,p) for C, H, N, O, and Cl and CAM-B3LYP/LanL2DZ for Pt)

-2280.05172171 hartree  
C,3.5663366607,2.4704058592,-0.1308820262  
C,3.1748358518,3.8020697802,-0.1874850191  
C,4.3415013528,4.5855384514,-0.2305026413  
C,5.4119471447,3.7068079777,-0.1996657276  
N,4.9415643002,2.4426435821,-0.1401564147  
H,2.1502663483,4.1423477196,-0.1929705687  
H,4.4042914099,5.6635026104,-0.277793609  
H,6.4759681235,3.8920667333,-0.2154944501  
C,2.7207305714,1.2865727629,-0.071651612  
C,3.3135282999,0.0242962487,0.0068940704  
C,2.6742599402,-1.2170680925,0.0472948784  
H,4.393208759,0.0031656435,0.0238709109  
O,1.4508249756,1.5235417895,-0.1050487864  
O,1.3987152504,-1.4331176045,0.0515053434  
C,3.4782611202,-2.4296540474,0.0847476705  
C,3.0394244484,-3.7474963386,0.1233503386  
N,4.8538082204,-2.4505456472,0.0813749681  
C,4.1774833291,-4.5719809644,0.1447392729  
H,2.0026556787,-4.0484537546,0.128327908  
C,5.2786829243,-3.7312023519,0.1175452558  
H,4.2024237404,-5.6520719815,0.1755299937  
H,6.33549913,-3.9544638979,0.120999696  
Pt,0.0002157456,0.0371793558,0.0013215992  
C,-1.3879129045,-2.5776482361,0.5183431773  
C,-3.8651825481,-1.4672969613,-0.3464533926  
C,-2.5239017103,-3.3430827689,0.5635741712  
H,-0.4119147034,-2.9961500243,0.7379026635  
H,-2.4830366173,-4.3846680998,0.8692777059

C,-2.7633562709,-0.60079445,-0.0027711048  
C,-1.4706392536,-1.2084789936,0.2021176298  
C,-2.7628833982,0.8229933961,0.1500291858  
C,-1.3035219547,2.697717625,-0.0186808302  
C,-2.3285497165,3.5762417073,0.1574555568  
H,-0.2779627187,3.0084340577,-0.1809717822  
H,-2.140761256,4.6428122827,0.1081874736  
N,-1.4875279312,1.3583010878,0.0183319949  
H,5.4992339018,-1.6399663679,0.0488643936  
H,5.5571725363,1.6094341118,-0.1084350965  
C,-3.7689540692,-2.8286306053,0.0914705867  
C,-4.895253825,-3.664753581,-0.0109251925  
C,-6.0494214981,-3.2224535496,-0.6192842672  
H,-6.9100642791,-3.8790303656,-0.7029271013  
C,-6.0822258942,-1.9549660497,-1.2105296209  
H,-6.9373989656,-1.6664039791,-1.81228099  
C,-5.0033228405,-1.0847355076,-1.118822472  
H,-4.8284149907,-4.6784553085,0.3735890619  
C,-3.6266234855,3.0960476334,0.5184948552  
C,-4.6653976541,3.96583459,0.8863329802  
C,-5.8778239441,3.4788559743,1.3383335924  
H,-6.6691010876,4.1642874208,1.6258438749  
H,-4.4894286895,5.0363345273,0.8291364443  
C,-6.0668898711,2.098633949,1.4476955183  
H,-7.002103656,1.7072811094,1.8368354798  
C,-3.8397851809,1.6877845175,0.5596747221  
C,-5.068178714,1.220554498,1.0676921663  
H,-5.229047126,0.1556325248,1.1724077554  
Cl,6.9071324687,-0.0414555723,-0.0280454938  
C,-5.0346503589,0.1421844354,-1.9567287532  
C,-3.9337545987,0.487210857,-2.7483508742  
C,-6.1874850177,0.9272649029,-2.0428376049  
C,-3.9832577835,1.5901694486,-3.5904162135  
H,-3.036788236,-0.121251062,-2.7089802915  
C,-6.2367509245,2.0322472291,-2.8828749854  
H,-7.0413862648,0.6857808569,-1.4186490512  
C,-5.1336885492,2.3687649169,-3.659135712  
H,-3.1176156553,1.840036262,-4.1955772452  
H,-7.1369523194,2.6378854817,-2.9222743626  
H,-5.1688927697,3.2345765754,-4.3131403031

### 3a·Cl<sup>-</sup> (T<sub>1</sub>)

(CAM-B3LYP/6-31G(d,p) for C, H, N, O, and Cl and CAM-B3LYP/LanL2DZ for Pt)

-2280.0786299 hartree

C,3.566428345,2.4849692274,-0.1324502662  
C,3.1771934721,3.8166152558,-0.1668102297  
C,4.3453458927,4.5997108772,-0.2260885753  
C,5.4136016826,3.7194995182,-0.2255504868  
N,4.9405862024,2.4551230473,-0.1698826049  
H,2.1533413297,4.1591274931,-0.1510581643  
H,4.4090624331,5.6781587995,-0.264682936  
H,6.4776788772,3.9018222302,-0.2600848849  
C,2.7167428788,1.2989802689,-0.0693348367  
C,3.3138170562,0.0335217298,-0.0610600051  
C,2.67947715,-1.2079735447,-0.002988351  
H,4.3924963589,0.0129995306,-0.1089827456  
O,1.4526334627,1.5345576427,-0.0291981319  
O,1.4068066267,-1.4306824018,0.0565872672  
C,3.4881494593,-2.4225229191,-0.0095206087

C,3.0518339176,-3.7395414422,0.0096812263  
N,4.8627853873,-2.4406775035,-0.041178325  
C,4.1926550924,-4.5639449683,-0.0106105877  
H,2.0151684076,-4.040536817,0.0288346284  
C,5.2911952676,-3.7224561788,-0.0414264845  
H,4.2187928211,-5.6446227942,-0.0047220617  
H,6.3483237863,-3.9431577975,-0.0634376504  
Pt,0.0052055907,0.0205731237,0.0900396487  
C,-1.4587328568,-2.5609483194,0.6689174377  
C,-3.9161638441,-1.4599498121,-0.2941601496  
C,-2.636661836,-3.2888264682,0.7780139861  
H,-0.5039944753,-3.0144844627,0.9145045234  
H,-2.6261235908,-4.309114469,1.1494907369  
C,-2.7865344616,-0.5946633119,0.0589411518  
C,-1.4724831318,-1.2366413338,0.2545435325  
C,-2.7849262262,0.7866010929,0.2743125403  
C,-1.3147614306,2.6591739782,0.1511869736  
C,-2.3535684685,3.5479780568,0.2741520318  
H,-0.2819378986,2.9663216675,0.0272635558  
H,-2.1604230631,4.6134382686,0.2245867076  
N,-1.5016393128,1.3318392075,0.1904186643  
H,5.5050603271,-1.6289374293,-0.0623983572  
H,5.5557250532,1.6213676444,-0.1547902869  
C,-3.8667268533,-2.7849499656,0.2311388355  
C,-4.9948514293,-3.6077825878,0.109320931  
C,-6.1030486659,-3.1839899995,-0.6038679288  
H,-6.9674417052,-3.8338360558,-0.7027430631  
C,-6.0813146653,-1.9574089792,-1.258413195  
H,-6.8998998265,-1.6763102909,-1.9121714002  
C,-4.9862815675,-1.0949367464,-1.1382563386  
H,-4.9718981202,-4.5990528802,0.5524848936  
C,-3.6667295249,3.0722169979,0.5708816792  
C,-4.7171658476,3.9541711717,0.8854177098  
C,-5.9454823582,3.4756731996,1.2880406041  
H,-6.7461790909,4.1651940284,1.5365817283  
H,-4.5332068073,5.0230368754,0.8268685196  
C,-6.1446048498,2.0951341649,1.4006380823  
H,-7.096992317,1.7110336675,1.752619503  
C,-3.8876936935,1.6714347273,0.6155180375  
C,-5.1342096976,1.2116389238,1.0715529665  
H,-5.3033630682,0.1477685285,1.1742698402  
Cl,6.9233182489,-0.0200766897,-0.1357872287  
C,-4.9635546403,0.1200907289,-1.9954490753  
C,-3.8313761969,0.4291845717,-2.7569649523  
C,-6.0929482794,0.9327553391,-2.1219996228  
C,-3.8259252552,1.527819432,-3.6058540027  
H,-2.9522454364,-0.2026806862,-2.6874523502  
C,-6.0879181479,2.0330407494,-2.9705816261  
H,-6.973632988,0.7141837898,-1.5269471196  
C,-4.9534386362,2.3356734864,-3.7141734905  
H,-2.9368039868,1.749660913,-4.1873777247  
H,-6.971634458,2.6594953651,-3.044144313  
H,-4.9467434174,3.1962858638,-4.3758584811

### 3b-1 (S<sub>0</sub>)

(CAM-B3LYP/6-31G(d,p) for C, H, N, and O and CAM-B3LYP/LanL2DZ for Pt)

-2281.6901114 hartree

C,-1.54823435,-4.1824711013,-0.4539721044  
C,-1.4930501685,-5.5664892494,-0.4443072753

C,-2.8166712389,-6.0422943499,-0.3967441613  
N,-2.872257278,-3.8324006107,-0.4245539996  
H,-0.5966494643,-6.1673058581,-0.4854573829  
H,-3.1319943943,-7.075357856,-0.4115818116  
C,-0.533762407,-3.1305687407,-0.4768276467  
C,0.8162840972,-3.493923426,-0.3989424103  
C,1.9103023453,-2.6298837061,-0.3714001328  
H,1.0328510095,-4.5495976237,-0.3174279214  
O,-0.995139473,-1.9388234585,-0.5538650159  
C,3.2546341683,-3.186447239,-0.2514612505  
C,3.7560792101,-4.4774905745,-0.2233937388  
N,4.3214476177,-2.3363875503,-0.1258913092  
C,5.1513890757,-4.3848961309,-0.0671433993  
H,3.1804214695,-5.3857758154,-0.3228490638  
C,5.4832479878,-3.0385184794,-0.0029288843  
H,5.8534410254,-5.2054061584,-0.0409647241  
Pt,0.225880272,-0.1997144023,-0.6188079487  
H,4.1997103386,-1.3393112413,-0.0401441004  
H,-3.166659883,-2.8724907534,-0.3404541585  
C,-2.5555456085,0.6503643162,-1.1973990366  
C,-0.9650911906,2.3805704517,-0.9740430528  
C,-3.5208815117,1.4953599258,-1.6442085282  
H,-2.7049579197,-0.4135639084,-1.0677561444  
C,-1.8624219492,3.2847898874,-1.634568519  
C,-3.1782808234,2.8404556614,-1.9287222281  
H,-4.518453814,1.1279678355,-1.85595149  
C,-1.4621894096,4.5601629862,-2.1062972578  
C,-4.0844579606,3.7186606324,-2.5699015093  
C,-2.344232658,5.370721354,-2.770372847  
C,-3.6775683712,4.9597549092,-2.9791907871  
H,-4.371604977,5.6201522093,-3.4891385362  
C,1.2130962501,1.5072790937,-0.5999632208  
C,2.6197290703,1.6575338273,-0.5788651383  
C,0.4099670314,2.6501268354,-0.5374455016  
C,3.1802495096,2.8970914808,-0.4624756374  
H,3.2387849615,0.776069732,-0.7019777628  
C,0.9658908299,3.9037778101,-0.0982547411  
C,2.3830508626,4.0382880139,-0.1746031946  
H,4.2579343617,3.0262329936,-0.5191344396  
C,2.9941023584,5.2839599817,0.1002949319  
C,0.8754603631,6.167259291,0.7768906673  
C,2.2472881833,6.348477046,0.5257419289  
H,2.7147672115,7.3029984383,0.7433657608  
N,-1.3037470494,1.0844695419,-0.8910533354  
O,1.8917563202,-1.3424442478,-0.42597372  
H,-2.014463132,6.3355283655,-3.1411217633  
H,0.3171776498,6.9627822104,1.259947767  
H,-5.0958255421,3.3741404632,-2.7618937751  
H,-0.4417589785,4.884550439,-1.9581849343  
H,4.0715467117,5.3682237614,-0.0075489264  
C,-1.1574000166,4.8121452907,1.0301698097  
C,-2.1221540626,5.8048057481,0.8405180457  
C,-1.4969502429,3.6971839352,1.8043621093  
C,-3.3925366626,5.6811169912,1.3894545666  
H,-1.8788278394,6.6721743055,0.2355076997  
C,-2.7665261636,3.5727346595,2.3541863342  
H,-0.7546849778,2.9267970914,1.9847284051  
H,-4.1291753331,6.4603567485,1.2203668649  
H,-3.0063360162,2.7015226541,2.9556518541  
C,0.2300153552,4.9755877987,0.5116367762

C,-3.6628376705,-4.9424123703,-0.3787916083  
C,-3.7212983118,4.5624709746,2.1462818056  
H,-4.7136850601,4.4640337963,2.5746068215  
C,-5.1241638395,-4.8667775711,-0.3382643092  
C,-5.8098027253,-3.7658694745,-0.8632381366  
C,-5.8682213693,-5.9072850172,0.2287797858  
C,-7.1961280027,-3.7034464861,-0.8143125737  
H,-5.2557302791,-2.9634923803,-1.34135346  
C,-7.2538458008,-5.8485442717,0.2663975988  
H,-5.3492015209,-6.7577080673,0.6582500657  
C,-7.924786508,-4.7447764928,-0.2509016358  
H,-7.7099552519,-2.842179576,-1.2295129562  
H,-7.813390428,-6.6648365014,0.7121044646  
H,-9.008256323,-4.6976818269,-0.216154718  
C,6.7853733684,-2.386116585,0.1451507327  
C,7.0098979398,-1.0934650876,-0.3410132733  
C,7.8397883624,-3.0536414708,0.7778880768  
C,8.2485711319,-0.4841611971,-0.190840074  
H,6.2176988713,-0.5690578701,-0.8670611813  
C,9.0800086077,-2.4475357617,0.916869342  
H,7.6740676616,-4.0483621179,1.1780988765  
C,9.2897062235,-1.1584445111,0.4370109938  
H,8.4038192055,0.5182360457,-0.5771092895  
H,9.885144154,-2.9807205958,1.4124504756  
H,10.2586030647,-0.6834145995,0.5508998421

### 3b-2 (S<sub>0</sub>)

(CAM-B3LYP/6-31G(d,p) for C, H, N, and O and CAM-B3LYP/LanL2DZ for Pt)

-2281.6860958 hartree  
C,-3.8796159607,3.2007437365,0.1494823162  
C,-4.0314250478,4.0863477699,-0.8992425355  
C,-4.5303156683,5.2941774748,-0.3730668757  
N,-4.2644113073,3.8604733658,1.2950813429  
H,-3.771120366,3.8739571736,-1.9249036005  
H,-4.7234037015,6.2072157164,-0.917130982  
C,-3.390666477,1.8218336172,0.1227671705  
C,-2.9992723097,1.2108683758,1.3264813474  
C,-2.5397388044,-0.0975199348,1.4858037978  
H,-2.9925251988,1.8229580085,2.2182037928  
O,-3.3497387758,1.2862911381,-1.0321174793  
C,-2.1489220015,-0.5592323936,2.8156865921  
C,-2.1848163839,0.010514804,4.0778079397  
N,-1.61007474,-1.8106476028,2.9539607019  
C,-1.6442104503,-0.9250520747,4.979321149  
H,-2.5733908943,0.9873477172,4.3251198778  
C,-1.2870620342,-2.0543116158,4.2553848195  
H,-1.5545685041,-0.8125097846,6.0498691279  
Pt,-2.7719448099,-0.7155017526,-1.4056620041  
H,-1.4120389831,-2.3943576368,2.1559536832  
H,-4.41927024,3.4127482081,2.183731835  
C,-3.8053000726,0.4408138579,-3.9269639981  
C,-2.9242964587,-1.7477724214,-4.0699010488  
C,-4.3036197406,0.3977898399,-5.190587439  
H,-3.8988659714,1.2990712963,-3.2730892218  
C,-3.6023693688,-1.9361892096,-5.3195976652  
C,-4.263403128,-0.8245580825,-5.905584322  
H,-4.7963519465,1.2648869321,-5.6151610829  
C,-3.7379513942,-3.2037958013,-5.9397872689  
C,-4.9309401229,-0.984119185,-7.1438985235

C,-4.4338252481,-3.3401577512,-7.111417219  
C,-5.0118136989,-2.2149971754,-7.7366785154  
H,-5.5433712063,-2.333897693,-8.6754234142  
C,-2.2084898919,-2.5288935093,-1.9405753287  
C,-1.8274561433,-3.5770288148,-1.0700273042  
C,-2.1380496073,-2.7373430433,-3.3214901579  
C,-1.366170836,-4.7598582802,-1.5727281576  
H,-1.952614719,-3.4381662328,-0.001815121  
C,-1.36607943,-3.831542272,-3.8505545789  
C,-1.0804619068,-4.9056153713,-2.9573730656  
H,-1.1423149405,-5.5940366369,-0.9128880775  
C,-0.4557365925,-6.0808718422,-3.43644869  
C,-0.1532285933,-5.0428154007,-5.5711589736  
C,-0.0389360758,-6.1690591768,-4.7365055466  
H,0.4461618047,-7.0670489694,-5.1044020941  
N,-3.1532260588,-0.6204240898,-3.3791607775  
O,-2.4005506091,-0.9939857764,0.572754387  
H,-4.5438951372,-4.3212612974,-7.5613542791  
H,0.3172693931,-5.0601045714,-6.5490178107  
H,-5.4068082209,-0.1183005278,-7.5937067819  
H,-3.3050270265,-4.0745974632,-5.4676269973  
H,-0.2901086088,-6.8998758667,-2.7425610221  
C,-0.6239558176,-2.6752939614,-6.0233916229  
C,-0.8534938194,-2.7448387319,-7.3998306544  
C,-0.1607908552,-1.4680142985,-5.4889294886  
C,-0.6463623361,-1.6394988736,-8.2157611835  
H,-1.2218675195,-3.6704835798,-7.8299941625  
C,0.0470944859,-0.3623785259,-6.3037399594  
H,0.0471914802,-1.3998406634,-4.4263767579  
H,-0.8415240159,-1.7138738854,-9.2810501657  
H,0.4105668335,0.562929983,-5.8679339121  
C,-0.7674308494,-3.8780454879,-5.15540623  
C,-4.6830228688,5.127848934,0.9931907644  
C,-0.1980614405,-0.4420428192,-7.6704293391  
H,-0.0376352134,0.4226915459,-8.3064197478  
C,-5.1725673995,6.0505134058,2.0189585899  
C,-4.7507834734,5.9472807407,3.3491243709  
C,-6.0774307209,7.0631329983,1.6819585894  
C,-5.2277929076,6.8236865859,4.3149744173  
H,-4.018865359,5.1942225889,3.6260227896  
C,-6.5429860318,7.9457544873,2.6458197547  
H,-6.4283409708,7.1414350469,0.6583304858  
C,-6.1244774745,7.8276555549,3.9676500045  
H,-4.8869975181,6.729064875,5.3411014961  
H,-7.2458899445,8.7239798469,2.3659005745  
H,-6.4939695329,8.5150196579,4.7215203462  
C,-0.6942596089,-3.3183618742,4.6961840711  
C,-0.897909381,-4.5041203069,3.9819996091  
C,0.0900700177,-3.3625884478,5.8539464842  
C,-0.3270197579,-5.6959164269,4.4083824537  
H,-1.5314519727,-4.5017351819,3.1000162414  
C,0.650241536,-4.5565677157,6.2846468278  
H,0.273708195,-2.4468336419,6.4060304321  
C,0.4479869929,-5.7283118079,5.5621202414  
H,-0.4985457018,-6.6058028743,3.8420508332  
H,1.2575283841,-4.5705926205,7.1841532025  
H,0.8909697315,-6.6605182708,5.8969670936

### 3b-3 (Su)

(CAM-B3LYP/6-31G(d,p) for C, H, N, and O and CAM-

### B3LYP/LanL2DZ for Pt)

-2281.6851463 hartree  
C,-1.7025423697,1.325718955,2.5849143844  
C,-1.9469329009,1.1385374185,3.9355118807  
C,-1.0259638689,1.9307180118,4.6462815889  
N,-0.655110278,2.2015307846,2.4844745229  
H,-2.706283658,0.5006164596,4.3629593159  
H,-0.9240481859,1.9964487136,5.7196551499  
C,-2.3178642068,0.8127909491,1.3608918991  
C,-3.3146631298,-0.1670509316,1.4662021689  
C,-3.9903189052,-0.7908994636,0.4116330024  
H,-3.5317213687,-0.5160499711,2.4666227926  
O,-1.8647870451,1.3200450046,0.2784190805  
C,-5.0231735683,-1.7818179377,0.709768511  
C,-5.5882546058,-2.7240907866,-0.1267474563  
N,-5.6013042132,-1.9402544373,1.9492501322  
C,-6.5338134186,-3.4509107216,0.6231935407  
H,-5.3085161459,-2.8756349537,-1.1580358964  
C,-6.5382604744,-2.9372468426,1.9090224669  
H,-7.125495383,-4.2878488146,0.2821000557  
Pt,-2.503549853,0.7156311376,-1.6634480798  
H,-5.5113246836,-1.2824042251,2.706328292  
H,-0.3236045524,2.532610627,1.5924416778  
C,-0.7244432139,3.060711118,-2.0411320182  
C,-1.4670301251,1.9890370889,-4.0090868367  
C,-0.195075198,4.1097991926,-2.7228530951  
H,-0.6891465315,2.9710328638,-0.9632773628  
C,-1.1216255695,3.1565472495,-4.7687802563  
C,-0.431566394,4.2117368221,-4.1163008131  
H,0.3307017046,4.8984807101,-2.1970102975  
C,-1.5365238183,3.3522243813,-6.1099213056  
C,-0.0724060553,5.3684463863,-4.8487211574  
C,-1.2204580912,4.5038318587,-6.780777182  
C,-0.4554878132,5.5105662706,-6.1551147823  
H,-0.1949999033,6.4095007118,-6.7046377386  
C,-2.9263865453,0.1815891248,-3.5116441536  
C,-3.8999236342,-0.7728129402,-3.8906966155  
C,-2.128545669,0.7729866316,-4.4952515189  
C,-4.036594803,-1.1257871568,-5.2025152717  
H,-4.5507984903,-1.1836582827,-3.1271348509  
C,-2.0440076817,0.1856206737,-5.8076629966  
C,-3.0981107939,-0.6982103272,-6.1817948383  
H,-4.8288597521,-1.8015186071,-5.5140630042  
C,-3.1672106111,-1.2012438365,-7.501837393  
C,-1.0492334918,-0.2002122133,-7.98950252  
C,-2.182247955,-0.9195772251,-8.4090311965  
H,-2.2306754503,-1.3096796975,-9.4202458622  
N,-1.3623206555,2.0385092997,-2.6713894352  
O,-3.7997124466,-0.6074924726,-0.8428275593  
H,-1.5631248194,4.6441857585,-7.8005593937  
H,-0.200825998,-0.111887576,-8.660577426  
H,0.4802512883,6.1541683003,-4.3430872135  
H,-2.1282164299,2.5907988408,-6.5984821389  
H,-4.0050915511,-1.8379362373,-7.7705663712  
C,0.3883278742,0.8545601605,-6.3007408449  
C,1.1079833273,1.7267881403,-7.1214068328  
C,0.9888038904,0.4117617786,-5.1170104224  
C,2.3791407571,2.159423219,-6.7643117659  
H,0.6541780652,2.0872784133,-8.0388322742  
C,2.2598643071,0.8430446261,-4.7592757664

H,0.4571632839,-0.2852839614,-4.4779142076  
H,2.9153137252,2.8451844846,-7.4129557475  
H,2.7082379387,0.4820630692,-3.8389357541  
C,-0.9405207836,0.3232316724,-6.7160283447  
C,-0.2273998045,2.5869062612,3.7199203424  
C,2.9595980153,1.7216417672,-5.5795561127  
H,3.9521249549,2.0596245421,-5.2990026954  
C,0.8906949469,3.5123478851,3.9127153424  
C,1.9045096711,3.6362139779,2.9563521171  
C,0.9668115288,4.293517194,5.0709851996  
C,2.95725479,4.5211357202,3.1487809292  
H,1.8875916424,3.0132431556,2.0669317146  
C,2.025284082,5.1689225186,5.2665901063  
H,0.1772142357,4.2226457933,5.8116812432  
C,3.023506897,5.2903969684,4.3049166144  
H,3.7360608654,4.6002284532,2.3968890651  
H,2.0659402704,5.7679156253,6.170823055  
H,3.8483192516,5.9788255188,4.4568948168  
C,-7.3304192892,-3.307370884,3.0830066629  
C,-6.8463879562,-3.1018710613,4.3797356202  
C,-8.5968353952,-3.8813792054,2.9262284746  
C,-7.6101513326,-3.4501746546,5.4860150527  
H,-5.8501964461,-2.6945138705,4.5251975177  
C,-9.353001701,-4.2404746773,4.0325797136  
H,-8.9926485738,-4.0272178719,1.9266723158  
C,-8.8658685229,-4.0224259944,5.3177027103  
H,-7.2162607597,-3.2852200016,6.4838741231  
H,-10.3339039013,-4.6830818178,3.8911410987  
H,-9.4608878208,-4.2984644635,6.1820469174

### 3b-4 (Su)

#### (CAM-B3LYP/6-31G(d,p) for C, H, N, and O and CAM-B3LYP/LanL2DZ for Pt)

-2281.6795984 hartree

C,-1.7484372691,1.5330700842,2.4377483949  
C,-1.7374997431,2.8386396198,2.8847508175  
C,-1.0379817023,2.8680458662,4.1082840536  
N,-1.0554526577,0.7816488301,3.3612310285  
H,-2.1637525361,3.6741559276,2.3506450414  
H,-0.8108732845,3.7407303137,4.7030909936  
C,-2.3393184637,0.9870368056,1.2134860714  
C,-1.9007271883,-0.2640792438,0.7432651819  
C,-2.3832423568,-0.9560701151,-0.3754106878  
H,-1.1065841807,-0.7396702286,1.3039912402  
O,-3.2157814582,1.7249839723,0.6617153794  
C,-1.7737605462,-2.2340770197,-0.7467020802  
C,-2.2850325901,-3.2357324501,-1.5489921481  
N,-0.5441202396,-2.6611395546,-0.3020337035  
C,-1.3461667018,-4.284865291,-1.5759667101  
H,-3.2441839075,-3.1973678065,-2.0420089527  
C,-0.2627258032,-3.9027634238,-0.8021368175  
H,-1.4256053777,-5.2110179514,-2.1261406864  
Pt,-4.3718668545,1.1430963213,-1.0197189304  
H,0.0814126049,-2.1227880698,0.2736162095  
H,-1.0732839589,-0.2248468635,3.3982847131  
C,-5.5240770923,3.6522025249,0.0530778546  
C,-6.5028394039,2.8187196553,-1.9301485224  
C,-6.4988716954,4.5833027732,0.2261020606  
H,-4.6837624655,3.5313939162,0.7256300514  
C,-7.6641030806,3.6260079678,-1.6924459415

C,-7.6354032507,4.5552842651,-0.6194638633  
H,-6.4459271757,5.2859153444,1.0497906649  
C,-8.8766277048,3.4592339143,-2.4076253379  
C,-8.7673233958,5.3689957968,-0.3725070409  
C,-9.9743581322,4.2235811554,-2.1136836768  
C,-9.9117904772,5.2092554226,-1.1059596558  
H,-10.782839586,5.8220718645,-0.8968674247  
C,-5.4713138145,0.7889309045,-2.617065148  
C,-5.43293985,-0.3878871498,-3.4013948748  
C,-6.2953006192,1.8471963335,-3.0114068186  
C,-6.1855303682,-0.4786438134,-4.5371017268  
H,-4.820707135,-1.2177693415,-3.0666872206  
C,-6.8316460992,1.888192181,-4.3472686965  
C,-6.867006324,0.6541634501,-5.0605013045  
H,-6.2200565505,-1.4041413424,-5.1060190882  
C,-7.5135975033,0.578564058,-6.3163205241  
C,-7.835296375,2.9493483647,-6.2881222383  
C,-8.0338152389,1.7000480626,-6.902581203  
H,-8.5250263977,1.6448691546,-7.8683940566  
N,-5.5459010321,2.7786499749,-0.9899400497  
O,-3.3457331789,-0.6037098228,-1.1427883909  
H,-10.8999914294,4.0688780172,-2.6581099871  
H,-8.1053153281,3.8520411795,-6.8268072751  
H,-8.7202762061,6.0954641466,0.4327876155  
H,-8.9377491311,2.7035469862,-3.1783848056  
H,-7.5631310037,-0.3843096317,-6.8164333488  
C,-6.8436287539,4.44528486,-4.6124686731  
C,-7.7495530326,5.5064905985,-4.6851348969  
C,-5.534437694,4.7189928192,-4.2014369131  
C,-7.3680281168,6.7971936683,-4.3401345711  
H,-8.7715838488,5.3110049147,-4.9930155669  
C,-5.1516974162,6.0090113874,-3.856597286  
H,-4.8087444164,3.9135396335,-4.161618711  
H,-8.0922230882,7.6041186643,-4.3942654628  
H,-4.1295503272,6.1985811353,-3.5442131373  
C,-7.2223341688,3.074282208,-5.0569356647  
C,-0.638385274,1.5748988094,4.3973791147  
C,-6.0676983278,7.0535711661,-3.9210288792  
H,-5.7689041369,8.0610492951,-3.6494125573  
C,0.0958827263,1.0349301335,5.5428459331  
C,0.8664589566,-0.127466312,5.4292773368  
C,0.0404360298,1.6799914727,6.7833475119  
C,1.552324063,-0.6350638736,6.5249149257  
H,0.9547185323,-0.6242238425,4.4675594056  
C,0.7368888677,1.1789079968,7.8735146783  
H,-0.5702052721,2.5702010925,6.8913221469  
C,1.4923357939,0.0166605818,7.7513412998  
H,2.1457576098,-1.5372895505,6.4160616991  
H,0.6804696782,1.6923902357,8.8280703798  
H,2.0313879023,-0.3774756114,8.6065248885  
C,0.998338694,-4.591777058,-0.5198778204  
C,2.1726606677,-3.8820271266,-0.2455273954  
C,1.0502370855,-5.9901357983,-0.5238732531  
C,3.359306165,-4.5501447734,0.0273212099  
H,2.1709132734,-2.7962233673,-0.2784688729  
C,2.2391943274,-6.6557591574,-0.2629292443  
H,0.1431911096,-6.5534405944,-0.7162098384  
C,3.3985284686,-5.9396463906,0.018800071  
H,4.2601798993,-3.9811334476,0.2340283577  
H,2.2587790639,-7.7409492879,-0.2691711492



H,4.3266002898,-6.4615219462,0.2276503297

### 3b (S<sub>i</sub>)

(CAM-B3LYP/6-31G(d,p) for C, H, N, and O and CAM-B3LYP/LanL2DZ for Pt)

-2281.59027104 hartree

C,-4.1890937572,3.1657958458,0.0564730092  
C,-5.4414296545,3.7149699344,0.2849422757  
C,-5.3243402597,5.1087230307,0.1414414519  
N,-3.3412262082,4.2039052273,-0.226825673  
H,-6.3414705547,3.1684929414,0.524685591  
H,-6.1192741961,5.8352927282,0.2245606221  
C,-3.666087508,1.804080914,0.0746524467  
C,-4.5495310635,0.7440451077,0.3096118776  
C,-4.2291478519,-0.612771597,0.3628986924  
H,-5.5847639913,1.0024210239,0.4813927768  
O,-2.4022297066,1.7130236428,-0.1300815358  
C,-5.2760554517,-1.5835136973,0.659652901  
C,-6.6450856709,-1.4884456207,0.8519727283  
N,-4.937327057,-2.902572224,0.8120964474  
C,-7.1218106514,-2.7812183684,1.133721361  
H,-7.2366960217,-0.5879401361,0.7786550996  
C,-6.0376407264,-3.6489581115,1.1101210098  
H,-8.1498627087,-3.0670455078,1.3013603351  
Pt,-1.3484668745,-0.1261991377,-0.2279479178  
H,-3.9767059965,-3.2091120231,0.7966746762  
H,-2.3549630252,4.0611449977,-0.3757389298  
C,0.5879877884,2.055321793,-0.7452850276  
C,1.4610013365,-0.1524415026,-0.8626230978  
C,1.7632872446,2.5984186301,-1.1664313151  
H,-0.2715985424,2.6559087078,-0.4760387285  
C,2.6420255493,0.3403171989,-1.5246788969  
C,2.8130416684,1.7497143078,-1.6365219144  
H,1.8736876014,3.6755263698,-1.218781745  
C,3.6041890284,-0.4929033966,-2.1260320138  
C,3.9668550969,2.2640228588,-2.2487720895  
C,4.7199448216,0.0383595304,-2.7463478317  
C,4.9177342511,1.4215733301,-2.7915956809  
H,5.8017595946,1.8314222103,-3.2690308352  
C,-0.2986975757,-1.7357234445,-0.4360452032  
C,-0.775722937,-3.0513704069,-0.5682721404  
C,1.1278564073,-1.4925600168,-0.4982028875  
C,0.1046773815,-4.0985191923,-0.665629215  
H,-1.8466065052,-3.2125613333,-0.6219011085  
C,2.0119321133,-2.5895389797,-0.1903734812  
C,1.4999176408,-3.9060231532,-0.4303634006  
H,-0.2508613107,-5.1108467355,-0.833966679  
C,2.3712657786,-5.0036767726,-0.3730681807  
C,4.1439801803,-3.5831682084,0.4117161251  
C,3.6890935587,-4.838869958,0.0084962092  
H,4.3532942555,-5.6954717051,0.0595633026  
N,0.4005183361,0.7203667529,-0.6414823498  
O,-3.0715538181,-1.1484017263,0.1844391173  
H,5.4437769882,-0.6279190215,-3.2049877574  
H,5.1352682009,-3.484660377,0.840215404  
H,4.0890487467,3.3415659001,-2.306790255  
H,3.4632360056,-1.5656718551,-2.1139501669  
H,1.9873587955,-5.991422148,-0.6098923734  
C,3.8046026145,-1.2164610448,1.0056744149  
C,5.1188578586,-0.7746270872,0.8258707745

C,2.9738765678,-0.5048148308,1.8788599361  
C,5.5846231851,0.3563944573,1.482401202  
H,5.7697826423,-1.3051355306,0.1389494279  
C,3.4416736621,0.6230845177,2.5396182317  
H,1.9605149581,-0.8503647548,2.0527435039  
H,6.6033170269,0.6924872626,1.3177509478  
H,2.7842968871,1.1583406821,3.2171791735  
C,3.32184351,-2.460094718,0.3574816464  
C,-4.0028235144,5.3934036183,-0.178032373  
C,4.7468045448,1.0603169644,2.3406340431  
H,5.1105947052,1.9440994961,2.8549312433  
C,-3.3443576217,6.6724195,-0.4497096056  
C,-2.2107733965,6.7468094552,-1.2665594021  
C,-3.8461849414,7.8543963622,0.1058848119  
C,-1.5927068658,7.9656904086,-1.5125174315  
H,-1.8249149335,5.8485377061,-1.7394574375  
C,-3.2335386375,9.0726364839,-0.1498409848  
H,-4.7125791845,7.8088506229,0.7573297933  
C,-2.1016370003,9.1340006189,-0.9567155453  
H,-0.716298264,8.0035950615,-2.1516605458  
H,-3.6360505518,9.9787293948,0.2917708064  
H,-1.6206268454,10.086762468,-1.1521906557  
C,-5.973349046,-5.0949685065,1.3289507054  
C,-4.9521152342,-5.8703305734,0.7690502845  
C,-6.9454607228,-5.7329936181,2.1072319567  
C,-4.9002717346,-7.2404692433,0.9880616741  
H,-4.2055182537,-5.4035793361,0.1334714643  
C,-6.8982836512,-7.1037536458,2.3157068084  
H,-7.7314928657,-5.1416704981,2.5649620949  
C,-5.8735677223,-7.8638770247,1.7606050463  
H,-4.1013130506,-7.8251679661,0.5432858015  
H,-7.6603624607,-7.5803736303,2.9240819173  
H,-5.8347816796,-8.9351453891,1.928577992

### 3b (T<sub>i</sub>)

(CAM-B3LYP/6-31G(d,p) for C, H, N, and O and CAM-B3LYP/LanL2DZ for Pt)

-2281.6217224 hartree

C,-4.1698398062,3.1994727832,0.1374732825  
C,-5.4222937521,3.7471443039,0.3635222033  
C,-5.3049142255,5.1426998386,0.2268922282  
N,-3.3171184958,4.2400152914,-0.1186283179  
H,-6.32125006,3.2003008214,0.6063238495  
H,-6.0879899546,5.873288728,0.3679932293  
C,-3.6534578867,1.832048755,0.113350138  
C,-4.5288785131,0.7792595878,0.4090994035  
C,-4.2154155089,-0.5788510339,0.4508000813  
H,-5.5471739545,1.0465191521,0.6536884348  
O,-2.4103950559,1.7306787305,-0.1772452811  
C,-5.2477094147,-1.5435528154,0.8173834135  
C,-6.6048096047,-1.4477141092,1.0786112681  
N,-4.9030575388,-2.8626075053,0.9463432913  
C,-7.0715579324,-2.7448418718,1.3600758526  
H,-7.1926774234,-0.5418276331,1.06742626  
C,-5.9918197434,-3.6139027497,1.2725505574  
H,-8.0792878547,-3.022554663,1.6323976624  
Pt,-1.3847287486,-0.135821197,-0.3273575795  
H,-3.9657133317,-3.1846273961,0.758813152  
H,-2.3555970781,4.0884166155,-0.3778131083  
C,0.5348706579,1.9911636762,-1.0489693389

C,1.4207596805,-0.215458682,-1.0681330732  
C,1.7212172343,2.5334826915,-1.4686314953  
H,-0.3380882512,2.5922276069,-0.8280601348  
C,2.6343457179,0.2771556405,-1.6980759271  
C,2.7925609967,1.677394002,-1.8578413239  
H,1.8183794004,3.6079352921,-1.5726942832  
C,3.6210066055,-0.5679659975,-2.2350652849  
C,3.9619527697,2.1861149122,-2.4555401973  
C,4.7469180743,-0.0494976711,-2.8416691175  
C,4.9323365105,1.3363120896,-2.9353129749  
H,5.8260662283,1.7357560278,-3.4033316083  
C,-0.3458643203,-1.7694668918,-0.5492702761  
C,-0.7768425354,-3.0565550318,-0.7998224338  
C,1.1069540883,-1.5095189992,-0.6393955648  
C,0.1362096466,-4.0978194512,-0.9806739058  
H,-1.8419882741,-3.2517540526,-0.8720461044  
C,2.0116641839,-2.6199260569,-0.3280233429  
C,1.5279005528,-3.9183091899,-0.6644040349  
H,-0.2071227345,-5.0974889625,-1.227231169  
C,2.3965886909,-5.0115027513,-0.5834853825  
C,4.0960794951,-3.6177983988,0.3895391854  
C,3.6820827736,-4.8539790827,-0.0857673872  
H,4.3462328892,-5.7096906008,-0.0166485844  
N,0.3622014498,0.6696209473,-0.8865870741  
O,-3.0757194716,-1.1257612606,0.2061424762  
H,5.4909788778,-0.7236952561,-3.2532759523  
H,5.060032282,-3.5186642578,0.8763623701  
H,4.0724293439,3.2619548125,-2.552192066  
H,3.4915546519,-1.6406972082,-2.1824374354  
H,2.0409234612,-5.9919313254,-0.8853411625  
C,3.7130098487,-1.2405111445,0.9649649685  
C,5.0202601553,-0.7725440405,0.8074013809  
C,2.8536131118,-0.5458894504,1.8229381033  
C,5.4520440774,0.3688118047,1.4713210805  
H,5.6959063867,-1.2949426391,0.1380330303  
C,3.2857548496,0.5933021086,2.4888751675  
H,1.8443135547,-0.9120860989,1.9795809204  
H,6.4678589368,0.7229661895,1.3272529927  
H,2.6059859316,1.1148368852,3.1550763813  
C,3.2648018627,-2.4924017063,0.3017614832  
C,-3.9811901351,5.4296391018,-0.0764961032  
C,4.5855035338,1.056809131,2.3127745248  
H,4.9226492034,1.9473058209,2.8336800802  
C,-3.313574535,6.7121114165,-0.3059517952  
C,-1.9482769826,6.8770364661,-0.047751906  
C,-4.0383325957,7.8074326119,-0.7883997694  
C,-1.3253999216,8.0973479838,-0.274010392  
H,-1.3732609002,6.0524371362,0.3631834558  
C,-3.4166422126,9.0290186739,-1.0031957045  
H,-5.0932360891,7.6883692884,-1.0121805781  
C,-2.056478798,9.179248359,-0.751312357  
H,-0.2660440822,8.2064957331,-0.0640898464  
H,-3.9953441402,9.866534027,-1.3797104166  
H,-1.5704552687,10.1338149676,-0.9243445035  
C,-5.9160461776,-5.0603525009,1.4858623732  
C,-4.7218020701,-5.676432237,1.8759437392  
C,-7.050629026,-5.8590324034,1.3047808101  
C,-4.6629121168,-7.0500739608,2.0706763989  
H,-3.8359811679,-5.0748171903,2.056398923  
C,-6.9923967008,-7.2298142687,1.5105322399

H,-7.9783511689,-5.3980876133,0.9823605924  
C,-5.7975670325,-7.8330159113,1.8907227156  
H,-3.7276003172,-7.5085503747,2.375793891  
H,-7.8829182166,-7.832655127,1.3631206526  
H,-5.7519278596,-8.9058769315,2.0466567997

### 3b·Cl<sup>-</sup> (S<sub>0</sub>)

(CAM-B3LYP/6-31G(d,p) for C, H, N, O, and Cl and CAM-B3LYP/LanL2DZ for Pt)

-2742.0064252 hartree  
C,3.6515183165,2.464927214,-0.4275785421  
C,3.196326373,3.7348142344,-0.7489074817  
C,4.3148558629,4.5715586717,-0.8505380361  
C,5.4425986756,3.8001769006,-0.5852241253  
N,5.0219039384,2.5257749924,-0.3375723085  
H,2.16089179,3.9942585307,-0.9073143508  
H,4.3156354289,5.6189277698,-1.1153996036  
C,2.8288925318,1.2710708096,-0.2318686994  
C,3.4295586295,0.0177334068,-0.0549198831  
C,2.7771358882,-1.2003452181,0.1423271708  
H,4.5100495476,-0.0103264853,-0.0766837906  
O,1.5645322383,1.4988800518,-0.2536117926  
O,1.4990991453,-1.3996592735,0.1883121602  
C,3.5448549074,-2.4326498666,0.314872391  
C,3.0310789336,-3.7150176995,0.4361872639  
N,4.9151898134,-2.5263532127,0.3763265693  
C,4.1141127917,-4.5923924961,0.5701341141  
H,1.9802169917,-3.9586888847,0.4220059822  
C,5.279630762,-3.8326027896,0.5307148584  
H,4.0631062692,-5.6629473175,0.7053800326  
Pt,0.0990657164,0.0312912255,0.0010045898  
C,-1.327446042,-2.6127579319,0.3821942539  
C,-3.8092193403,-1.4824910718,-0.3863854064  
C,-2.4507534981,-3.3862395473,0.3834438084  
H,-0.3512722617,-3.0339891689,0.5963733992  
H,-2.3978704238,-4.441788187,0.6387388645  
C,-2.6804983565,-0.6470061757,-0.065512754  
C,-1.4183682135,-1.2175437817,0.1453608797  
C,-2.657328566,0.8129535622,0.0814543214  
C,-1.2184526999,2.6844744876,-0.0347494042  
C,-2.227949668,3.5653671243,0.1965386864  
H,-0.1861801191,2.9746493209,-0.1930084912  
H,-2.0365639476,4.6323993472,0.1921926827  
N,-1.432875256,1.3420737494,-0.0663404424  
H,5.5704478448,-1.7336018155,0.3181900484  
H,5.6375923702,1.7399681919,-0.0806453262  
C,-3.704913176,-2.8621928352,-0.0401932159  
C,-4.821287205,-3.7164307832,-0.186358844  
C,-5.9860426168,-3.2599985514,-0.7433296777  
H,-6.8410094009,-3.9179738882,-0.8615785526  
C,-6.0303940302,-1.9528513773,-1.2578789258  
H,-6.8921502539,-1.6418086247,-1.8401609448  
C,-4.9704693821,-1.0757969442,-1.1275931922  
H,-4.7242048761,-4.7518042103,0.1282800044  
C,-3.5070952344,3.0679954445,0.5485762949  
C,-4.5457124396,3.9256766777,0.98601605  
C,-5.7177690184,3.411191335,1.4708599393  
H,-6.5004702682,4.0758456538,1.823470389  
H,-4.377557756,4.9981492483,0.9617572581  
C,-5.8973597855,2.0139216949,1.5460509742

H,-6.8078384434,1.6099030547,1.9767955992  
C,-3.7200447518,1.6644404419,0.537294752  
C,-4.9283582798,1.1633825362,1.0828464784  
H,-5.0733511889,0.0941472113,1.1519838087  
Cl,6.9456289922,0.0010189054,0.2912392269  
C,-5.0252715072,0.1864837632,-1.9180453206  
C,-3.9542428809,0.5543765148,-2.7401415893  
C,-6.1747361843,0.9807670251,-1.9363392984  
C,-4.0266159029,1.6880380848,-3.5393181978  
H,-3.0587843202,-0.0576249787,-2.7543569041  
C,-6.2487062208,2.1148962319,-2.7356815532  
H,-7.0095697257,0.7181609456,-1.2946664715  
C,-5.1733006795,2.4753239752,-3.5391590633  
H,-3.182451298,1.9530988398,-4.1681397629  
H,-7.1480110734,2.7233716715,-2.7231902989  
H,-5.2272324052,3.3637791611,-4.1606292913  
C,6.6697683775,-4.2887999035,0.6428866835  
C,7.7298072107,-3.4050082184,0.8798092036  
C,6.9597643137,-5.6550000894,0.5211189028  
C,9.0301909584,-3.8813759936,0.9927167165  
H,7.5502800866,-2.337214314,0.9645706143  
C,8.2588010366,-6.1253896536,0.6430261987  
H,6.1566251506,-6.354356848,0.3142773609  
C,9.3050508247,-5.2394159802,0.8808936038  
H,9.8344061231,-3.1739444033,1.1708057173  
H,8.4555360123,-7.1892284744,0.5435386305  
H,10.3238055686,-5.6045765917,0.9720107472  
C,6.8495753066,4.2165644051,-0.5705773827  
C,7.901258968,3.2925284258,-0.5971605733  
C,7.1655591082,5.5819348146,-0.5412153361  
C,9.2202452103,3.7293708221,-0.5970957705  
H,7.6979646905,2.2256124038,-0.6031874098  
C,8.4841730492,6.0120824363,-0.5506083666  
H,6.365627702,6.3134553318,-0.4957098199  
C,9.5224391754,5.0861566942,-0.5792146391  
H,10.0172252764,2.9921549481,-0.6114297534  
H,8.701591903,7.0762715475,-0.5266294473  
H,10.5558432367,5.4201732101,-0.5812348001

### 3b·Cl<sup>-</sup> (S<sub>i</sub>)

(CAM-B3LYP/6-31G(d,p) for C, H, N, O, and Cl and CAM-B3LYP/LanL2DZ for Pt)

-2741.90994228 hartree

C,3.6355352006,2.4933421573,-0.1723509279  
C,3.1713591587,3.8000917667,-0.2482812281  
C,4.2864240274,4.6403994432,-0.3230941829  
C,5.4235838886,3.8352980403,-0.2933028906  
N,5.010059468,2.5397102767,-0.1985793953  
H,2.130444165,4.0835907455,-0.2371914463  
H,4.2791799353,5.7196064347,-0.3672601681  
C,2.8195180775,1.2887444473,-0.079958237  
C,3.4179882439,0.030003325,0.0345527411  
C,2.7660245853,-1.2034410125,0.122134424  
H,4.498809034,0.0056373028,0.0458783623  
O,1.5489610841,1.5191199254,-0.1204700375  
O,1.4881956232,-1.4056180649,0.1384083307  
C,3.5319033666,-2.4410400082,0.2003820929  
C,3.013270985,-3.7290534378,0.2385332801  
N,4.9031089572,-2.5438605501,0.238969237  
C,4.0922271774,-4.6155119415,0.304760777

H,1.9612433602,-3.9659651523,0.2032254722  
C,5.261855501,-3.857168168,0.307326088  
H,4.040721961,-5.6942787215,0.3223454679  
Pt,0.0858321867,0.0529426306,0.0353079277  
C,-1.307054982,-2.5372944999,0.6501768374  
C,-3.7821156615,-1.4624231503,-0.2634872484  
C,-2.4435511571,-3.2998052228,0.7248089537  
H,-0.3327394402,-2.9472239176,0.8921472243  
H,-2.403795154,-4.3275992272,1.0741223305  
C,-2.6800457959,-0.5832938767,0.0462752943  
C,-1.387711189,-1.1823818313,0.2773840669  
C,-2.6785253056,0.8447523074,0.1431982442  
C,-1.2168681035,2.7094771078,-0.0972252435  
C,-2.2412202344,3.5957763373,0.0386011311  
H,-0.1911245428,3.0128725769,-0.270718011  
H,-2.0522495875,4.6591211353,-0.0551922226  
N,-1.4016330145,1.3729373304,-0.0044616969  
H,5.5623371631,-1.7513386043,0.2355232209  
H,5.6358150406,1.7210005563,-0.168754934  
C,-3.6874231455,-2.8048126451,0.2292987659  
C,-4.8135716768,-3.6441970807,0.1584621014  
C,-5.9665020504,-3.2264822148,-0.4696052771  
H,-6.8271736286,-3.8856609342,-0.5284088841  
C,-5.9976547006,-1.983942879,-1.1113715793  
H,-6.8516070419,-1.7194759143,-1.7257805832  
C,-4.9184992787,-1.1109468772,-1.0527946202  
H,-4.747876756,-4.6415158893,0.5838006812  
C,-3.5407717629,3.1320992081,0.4158527594  
C,-4.5793715064,4.0173465399,0.7450408507  
C,-5.7933425987,3.5504440457,1.21369169  
H,-6.5845473138,4.2478230495,1.4709575952  
H,-4.4021946004,5.0844183688,0.6444156404  
C,-5.9841276347,2.1760675355,1.3791657767  
H,-6.9206441504,1.8019821824,1.781843135  
C,-3.7555195372,1.7270140506,0.5142524626  
C,-4.9854849997,1.2821471575,1.0378864423  
H,-5.1477264389,0.2225680541,1.1857580798  
Cl,6.941847004,-0.0406270015,0.0585306233  
C,-4.947746625,0.0811685776,-1.9395138109  
C,-3.8454864308,0.3931929803,-2.742847541  
C,-6.09995053,0.8628660773,-2.0589257178  
C,-3.8929644682,1.4613273274,-3.6287521073  
H,-2.9491810026,-0.214051541,-2.6778855598  
C,-6.1471296674,1.9331764638,-2.9428155102  
H,-6.955067885,0.6471919425,-1.4269960481  
C,-5.0426918336,2.2373781483,-3.7303810159  
H,-3.026473908,1.685808956,-4.2425861522  
H,-7.0468450582,2.5372738473,-3.0080188271  
H,-5.0763887568,3.0760119749,-4.4189384292  
C,6.6507970765,-4.3262305328,0.3597115043  
C,7.7317288372,-3.4934447465,0.0455314147  
C,6.9171230025,-5.6535081128,0.7235917301  
C,9.0314029514,-3.9821169006,0.0939349626  
H,7.5677826259,-2.4548279851,-0.226387299  
C,8.2161742872,-6.1376650779,0.7619896838  
H,6.0952531331,-6.3081275814,0.9935260288  
C,9.2837670475,-5.303005445,0.4460361853  
H,9.8526711723,-3.3147468984,-0.1486568771  
H,8.3958098036,-7.1700730274,1.0482065347  
H,10.3022196051,-5.6784489523,0.4799957779

C,6.8313137711,4.2457377203,-0.3380607736  
C,7.8729692704,3.3765956173,0.0085068192  
C,7.1567477868,5.5522264287,-0.7280997473  
C,9.1922905496,3.8100776098,-0.0341540415  
H,7.6629003043,2.3520742008,0.3012997679  
C,8.4751263985,5.9814620656,-0.7607314733  
H,6.3660119614,6.2338402425,-1.0230925761  
C,9.5033812876,5.1110198999,-0.4124990253  
H,9.9822266326,3.1151586626,0.2338063079  
H,8.7007919388,6.9987726147,-1.0676786486  
H,10.5368545053,5.4433303072,-0.44181387

### 3b·Cl<sup>-</sup> (T<sub>1</sub>)

(CAM-B3LYP/6-31G(d,p) for C, H, N, O, and Cl and CAM-B3LYP/LanL2DZ for Pt)

-2741.9370853 hartree

C,-2.46363564,2.5007201016,-0.1107546001  
C,-1.921823968,3.777182092,-0.0810890525  
C,-2.984914044,4.6867127466,-0.0265701985  
C,-4.1673960596,3.9521198411,-0.027599505  
N,-3.8319526723,2.6302248293,-0.072718281  
H,-0.8652995236,3.9964561442,-0.0831189546  
H,-2.9111348715,5.7627737473,0.0342533137  
C,-1.7196100139,1.2425609767,-0.1609294234  
C,-2.3928326213,0.0182962431,-0.0607711923  
C,-1.8221271705,-1.2559649203,-0.09536375  
H,-3.4653704693,0.0623376523,0.0684865961  
O,-0.4486137259,1.3935289029,-0.286950717  
O,-0.5675944104,-1.5442669175,-0.2184290616  
C,-2.6598958813,-2.4469516748,0.0261971837  
C,-2.2155816086,-3.7563593621,0.1342247681  
N,-4.0338832855,-2.4678051616,0.0671420374  
C,-3.3455484637,-4.5765452759,0.2394051786  
H,-1.177175604,-4.0494254266,0.1505450959  
C,-4.4688454174,-3.7555728398,0.1902946854  
H,-3.3538876365,-5.6494921274,0.3650579228  
Pt,0.914708914,-0.1926820431,-0.4026214789  
C,2.2001397796,-2.880440579,-0.918767488  
C,4.7604721212,-1.8811669913,-0.1267440969  
C,3.3289731699,-3.6816658395,-1.0434208499  
H,1.2111372285,-3.2893419941,-1.0984998374  
H,3.2423393844,-4.7163059175,-1.3612039571  
C,3.6662216116,-0.969604916,-0.4746299633  
C,2.30907878,-1.5415716269,-0.5738258888  
C,3.7313794394,0.3959926701,-0.7673772713  
C,2.3748983989,2.3543277689,-0.6908959652  
C,3.4528718973,3.1732847069,-0.9161885847  
H,1.3680302519,-2.727774282,-0.5401017107  
H,3.3205967612,4.2490838845,-0.9247503003  
N,2.4866945974,1.0183470422,-0.6553932245  
H,-4.645358843,-1.6436447359,-0.0234561176  
H,-4.5057917661,1.8511829562,-0.1159972066  
C,4.6104733292,-3.2255654477,-0.5785057233  
C,5.6937855523,-4.1069577445,-0.463276527  
C,6.8572080051,-3.7143580568,0.1767227538  
H,7.6866053063,-4.408808471,0.2716043236  
C,6.9370755362,-2.4572245871,0.7647246141  
H,7.8009398205,-2.1923269152,1.3647383608  
C,5.8885714793,-1.5378575205,0.6474612588  
H,5.5933848598,-5.1161331159,-0.8517982777

C,4.7221078217,2.6060471975,-1.2405537409  
C,5.8032573322,3.4065120579,-1.6542011211  
C,6.9827610888,2.8354509927,-2.0804863595  
H,7.8073802209,3.4619369908,-2.405702339  
H,5.6810494934,4.4857364605,-1.6529039296  
C,7.1004208416,1.4413044939,-2.1173742689  
H,8.0125764823,0.9833657133,-2.4870421407  
C,4.8635209567,1.1946837666,-1.2095080531  
C,6.0602018945,0.6380699831,-1.6909613954  
H,6.1659116697,-0.4378656606,-1.7362992582  
Cl,-5.9257298165,0.1626473574,-0.0478927307  
C,5.9769004351,-0.2804611942,1.4364090935  
C,4.90227272,0.1356167457,2.2297097149  
C,7.1557873421,0.4687889915,1.4663844728  
C,5.0006231187,1.2761149403,3.0153754772  
H,3.9862766215,-0.4456889493,2.2356627188  
C,7.2545506038,1.6109232074,2.2515358583  
H,7.9929598194,0.1665584757,0.8456831034  
C,6.1763794725,2.0197983182,3.0274088867  
H,4.1549774797,1.5810263492,3.6235138732  
H,8.1751821285,2.1864261193,2.2503298975  
H,6.250944405,2.913039934,3.6398178325  
C,-5.8831039148,-4.1388776614,0.2642626399  
C,-6.8984871556,-3.2035155108,0.4987426226  
C,-6.2434480979,-5.4845930034,0.1079881781  
C,-8.2247839901,-3.6104198086,0.5752905865  
H,-6.6623956372,-2.1491375142,0.6092026442  
C,-7.5682766619,-5.8859327299,0.1944407323  
H,-5.4747837529,-6.2219792392,-0.0978477227  
C,-8.5699087924,-4.9491488985,0.4297396789  
H,-8.9934310933,-2.8640439947,0.7514388826  
H,-7.8201470954,-6.9352843469,0.0688598134  
H,-9.6085876693,-5.260105992,0.4926562176  
C,-5.547859611,4.447230955,0.0217669744  
C,-6.6305977019,3.6102430165,0.3178405028  
C,-5.8042205872,5.8036486308,-0.2220857807  
C,-7.921146653,4.1225338988,0.3687332285  
H,-6.4755780906,2.5500284043,0.495449893  
C,-7.0936507826,6.3109757087,-0.1608445753  
H,-4.9823814419,6.4643776313,-0.4770906917  
C,-8.1629016553,5.4715905043,0.1362929723  
H,-8.7439588204,3.4507726187,0.5936382929  
H,-7.2648207403,7.36614137,-0.354877315  
H,-9.1741687141,5.8652312903,0.1795657461

[S3] *Gaussian 16, Revision C.01*, M. J. Frisch, G. W. Trucks, H. B. Schlegel, G. E. Scuseria, M. A. Robb, J. R. Cheeseman, G. Scalmani, V. Barone, G. A. Petersson, H. Nakatsuji, X. Li, M. Caricato, A. V. Marenich, J. Bloino, B. G. Janesko, R. Gomperts, B. Mennucci, H. P. Hratchian, J. V. Ortiz, A. F. Izmaylov, J. L. Sonnenberg, D. Williams-Young, F. Ding, F. Lipparini, F. Egidi, J. Goings, B. Peng, A. Petrone, T. Henderson, D. Ranasinghe, V. G. Zakrzewski, J. Gao, N. Rega, G. Zheng, W. Liang, M. Hada, M. Ehara, K. Toyota, R. Fukuda, J. Hasegawa, M. Ishida, T. Nakajima, Y. Honda, O. Kitao, H. Nakai, T. Vreven, K. Throssell, J. A. Montgomery, Jr., J. E. Peralta, F. Ogliaro, M. J. Bearpark, J. J. Heyd, E. N. Brothers, K. N. Kudin, V. N. Staroverov, T. A. Keith, R. Kobayashi, J. Normand, K. Raghavachari, A. P. Rendell, J. C. Burant, S. S. Iyengar, J. Tomasi, M. Cossi, J. M. Millam, M. Klene, C. Adamo, R. Cammi, J. W. Ochterski, R. L. Martin, K. Morokuma, O. Farkas, J. B.

Foresman and D. J. Fox, Gaussian, Inc., Wallingford CT, 2016.

[S4] Articles for *GAMESS*: (a) M. W. Schmidt, K. K., Baldrige, J. A. Boatz, S. T. Elbert, M. S. Gordon, J. H. Jensen, S. Koseki, N. Matsunaga, K. A. Nguyen, S. J. Su, T. L. Windus, M. Dupuis and J. A. Montgomery, *J. Comput. Chem.*, 1993, **14**, 1347–1363; (b) M. S. Gordon and M. W. Schmidt, in *Theory and Applications of Computational Chemistry: the first forty years*, eds. C. E. Dykstra, G. Frenking, K. S. Kim and G. E. Scuseria, Elsevier, 2005, pp.1167–1189; (c) G. M. J. Barca, C. Bertoni, L. Carrington, D. Datta, N. De Silva, J. E. Deustua, D. G. Fedorov, J. R. Gour, A. O. Gunina, E. Guidez, T. Harville, S. Irle, J. Ivanic, K. Kowalski, S. S. Leang, H. Li, W. Li, J. J. Lutz, I. Magoulas, J. Mato, V.

Mironov, H. Nakata, B. Q. Pham, P. Piecuch, D. Poole, S. R. Pruitt, A. P. Rendell, L. B. Roskop, K. Ruedenberg, T. Sattasathuchana, M. W. Schmidt, J. Shen, L. Slipchenko, M. Sosonkina, V. Sundriyal, A. Tiwari, J. L. Galvez Vallejo, B. Westheimer, M. Włoch, P. Xu, F. Zahariev and M. S. Gordon, *J. Chem. Phys.*, 2020, **152**, 154102.

[S5] Report for FMO: K. Kitaura, E. Ikeo, T. Asada, T. Nakano and M. Uebayasi, *Chem. Phys. Lett.*, 1999, **313**, 701–706.

[S6] Report for pair interaction energy decomposition analysis (PIEDA): D. G. Fedorov and K. Kitaura, *J. Comput. Chem.*, 2007, **28**, 222–237.

#### 4. Anion-binding behaviors

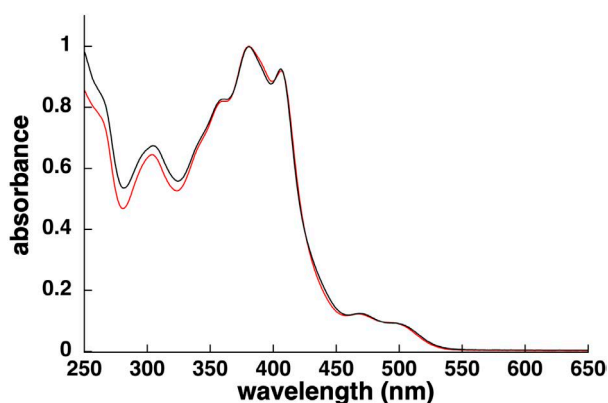

**Fig. S34** UV/vis absorption spectra of **2a** in  $\text{CH}_2\text{Cl}_2$  (0.03 mM) in the absence (black) and presence (red) of 3000 equiv of  $\text{Cl}^-$  as a tetrabutylammonium (TBA) salt. Anion-free and anion-binding forms show the similar UV/vis absorption spectra, as conformation changes in the anion-free and anion-binding forms result in the very small change in the directions of their transition dipole moments. Such UV/vis absorption spectral changes were also supported by TD-DFT calculations (Fig. S25).

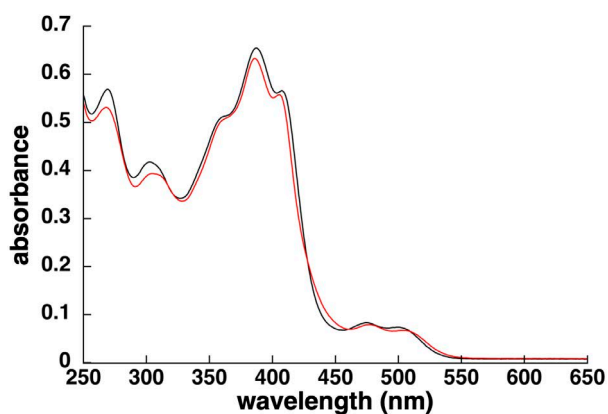

**Fig. S35** UV/vis absorption spectra of **3a** in  $\text{CH}_2\text{Cl}_2$  (0.015 mM) in the absence (black) and presence (red) of 2000 equiv of  $\text{Cl}^-$  as a TBA salt. Anion-free and anion-binding forms show the similar UV/vis absorption spectra, as conformation changes in the anion-free and anion-binding forms result in the very small change in the directions of their transition dipole moments. Such UV/vis absorption spectra were also supported by TD-DFT calculations (Fig. S26).

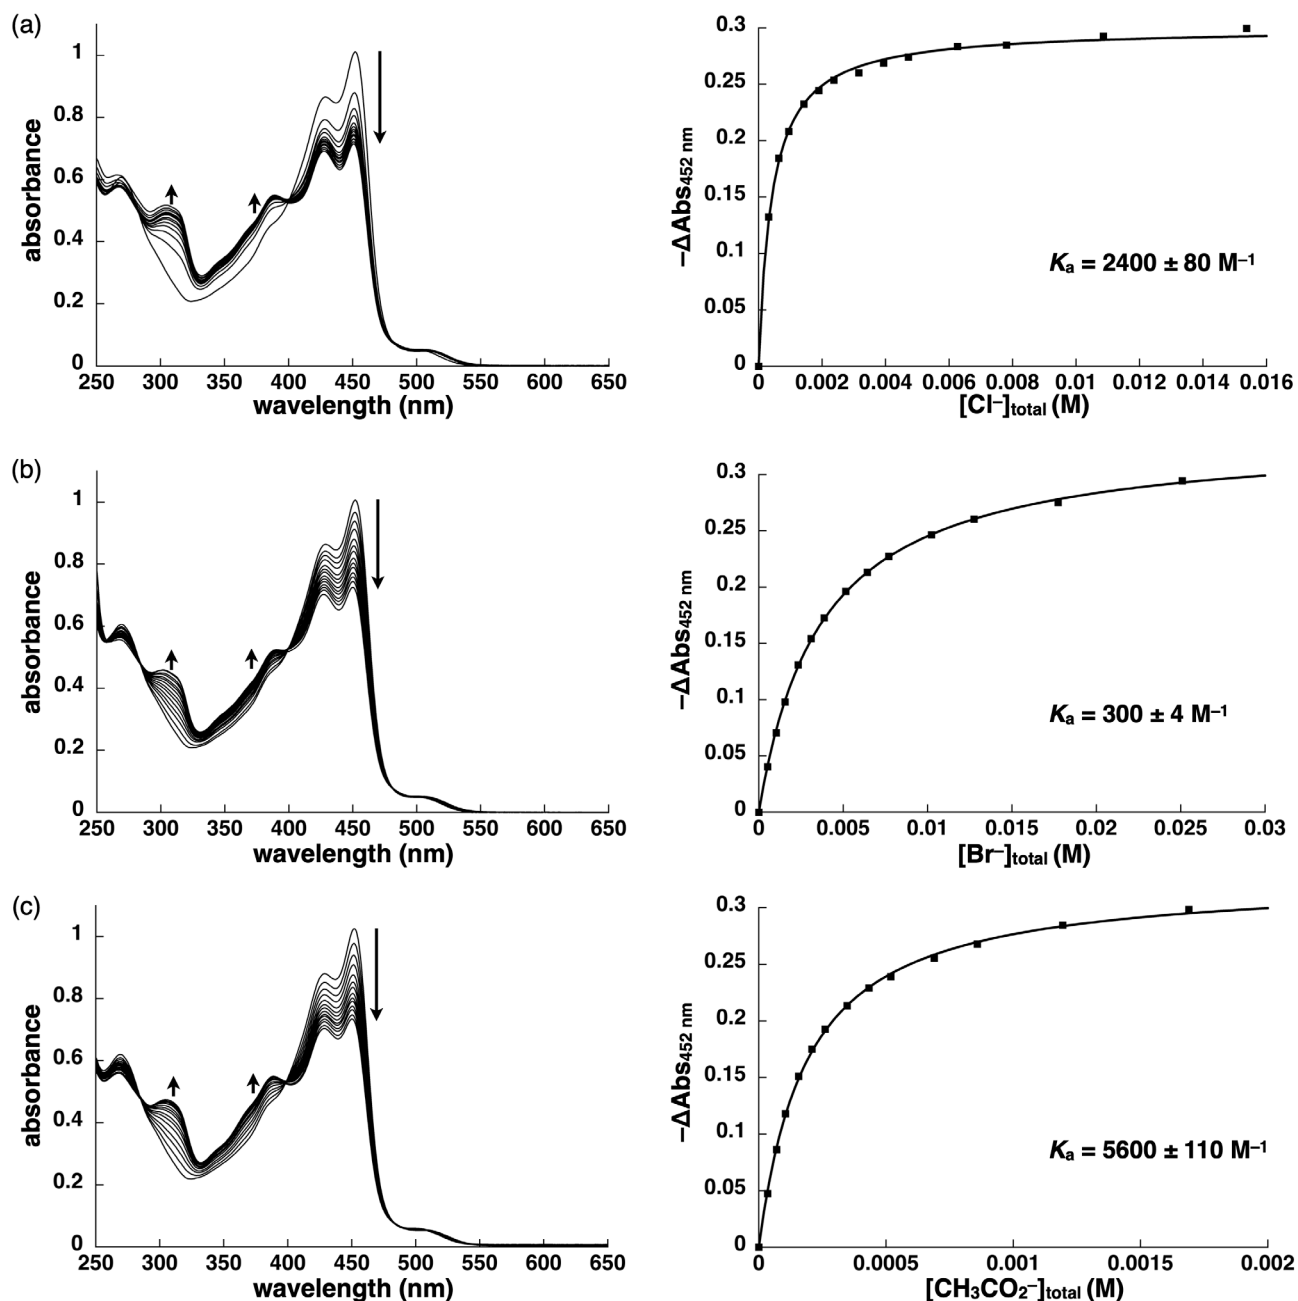

**Fig. S36** UV/vis absorption spectral changes (left) and titration plots and 1:1 fitting curves (left) of **3b** (0.015 mM) upon the addition of (a)  $\text{Cl}^-$ , (b)  $\text{Br}^-$ , and (c)  $\text{CH}_3\text{CO}_2^-$  as TBA salts in  $\text{CH}_2\text{Cl}_2$ .

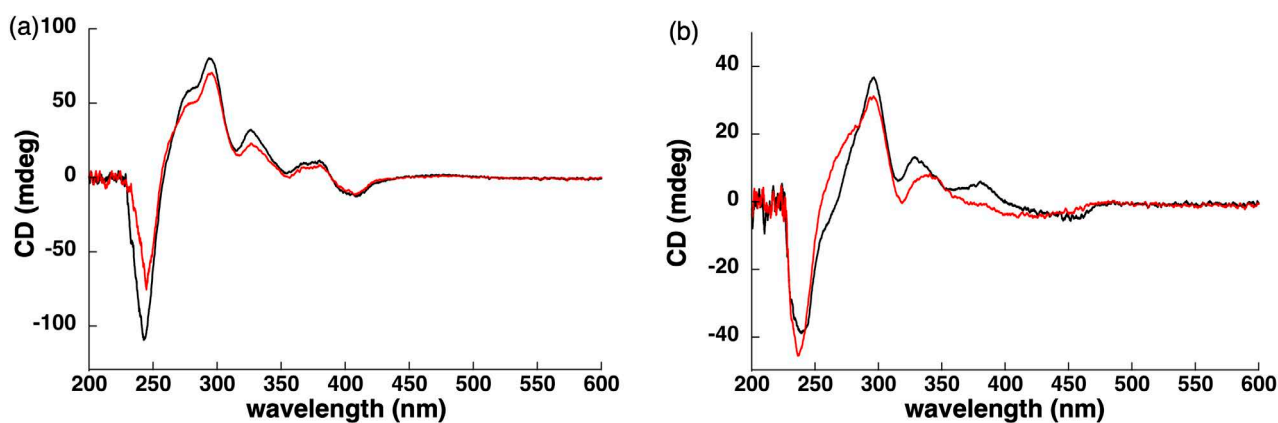

**Fig. S37** CD spectral changes of (a) **3a** (0.03 mM) and (b) **3b** (0.015 mM) in the absence (black) and presence (red) of  $\text{Cl}^-$  as a TBA salt (2000 and 1000 equiv for **3a** and **3b**, respectively) in  $\text{CH}_2\text{Cl}_2$ .

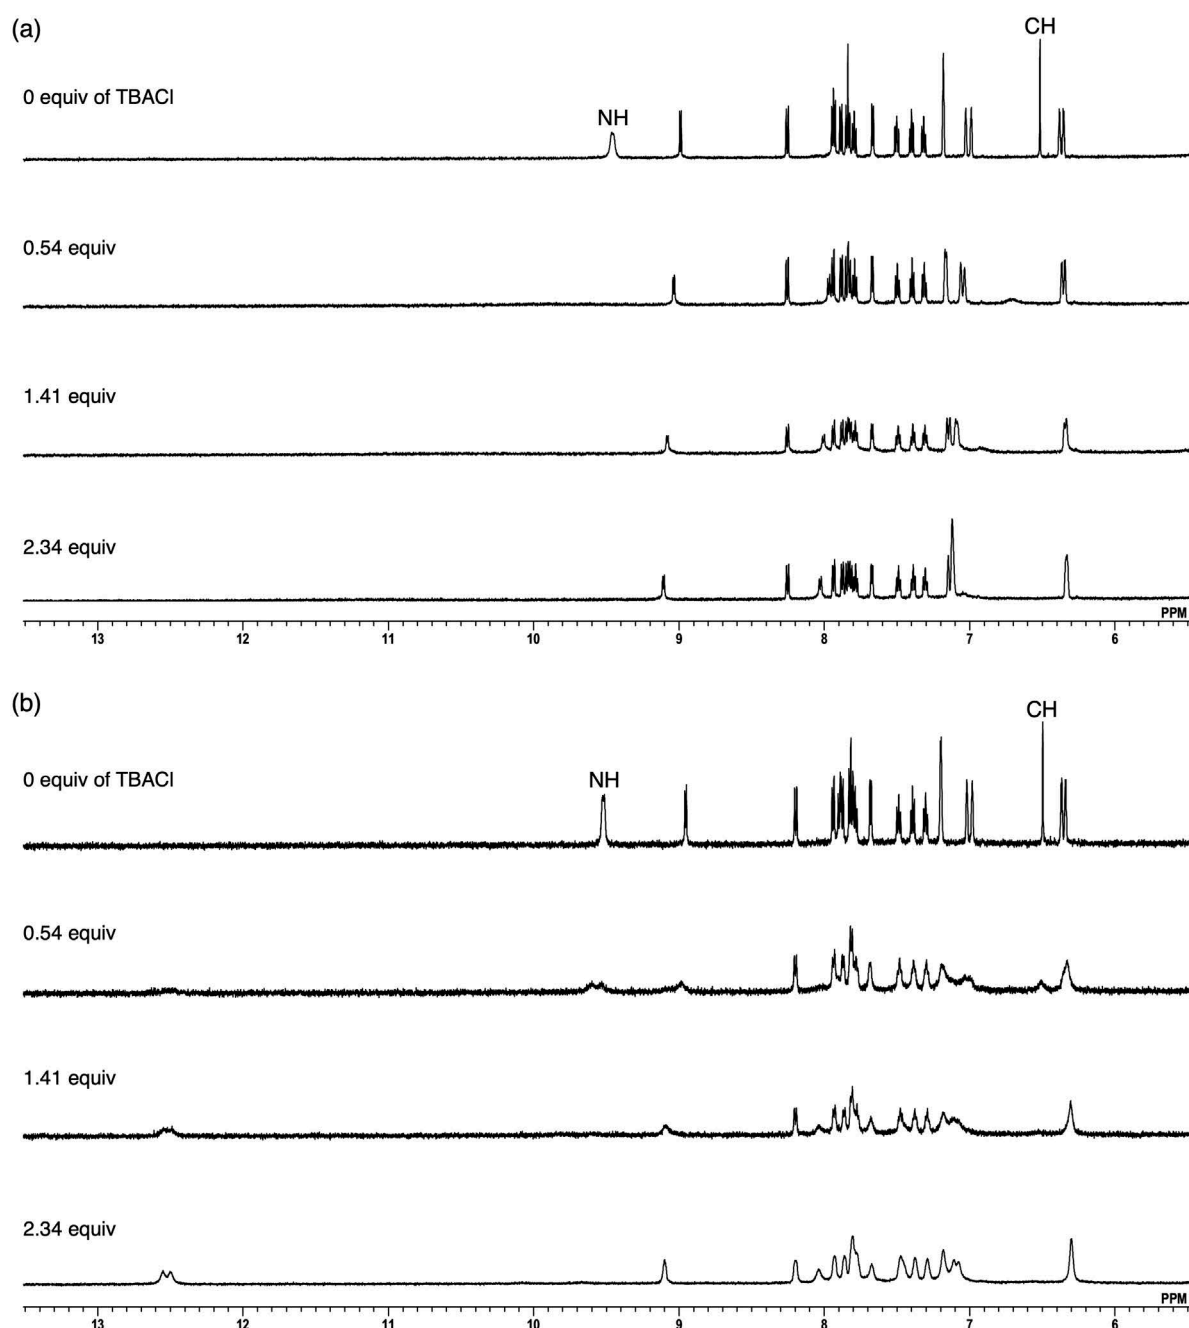

**Fig. S38**  $^1\text{H}$  NMR spectral changes of **2a** ( $1.0 \times 10^{-3}$  M) upon the addition of  $\text{Cl}^-$  (0–2.34 equiv) added as a TBA salt in  $\text{CD}_2\text{Cl}_2$  at (a)  $20\text{ }^\circ\text{C}$  and (b)  $-50\text{ }^\circ\text{C}$ . Upon the addition of 2.34 equiv of TBACl at  $-50\text{ }^\circ\text{C}$ , the signals of pyrrole NH (9.53 and 9.51 ppm) and bridging CH (6.50 ppm) were decreased and new signals were emerged in the downfield region, whose signals were identified as anion-binding pyrrole NH (12.55 and 12.50 ppm) and bridging CH (8.04 ppm). The equilibrium constant ( $K_a$ ) was estimated to be  $1 \times 10^3\text{ M}^{-1}$  by the integrals of NH signals in the  $^1\text{H}$  NMR spectrum at  $-50\text{ }^\circ\text{C}$  upon the addition of 0.54 equiv of TBACl.



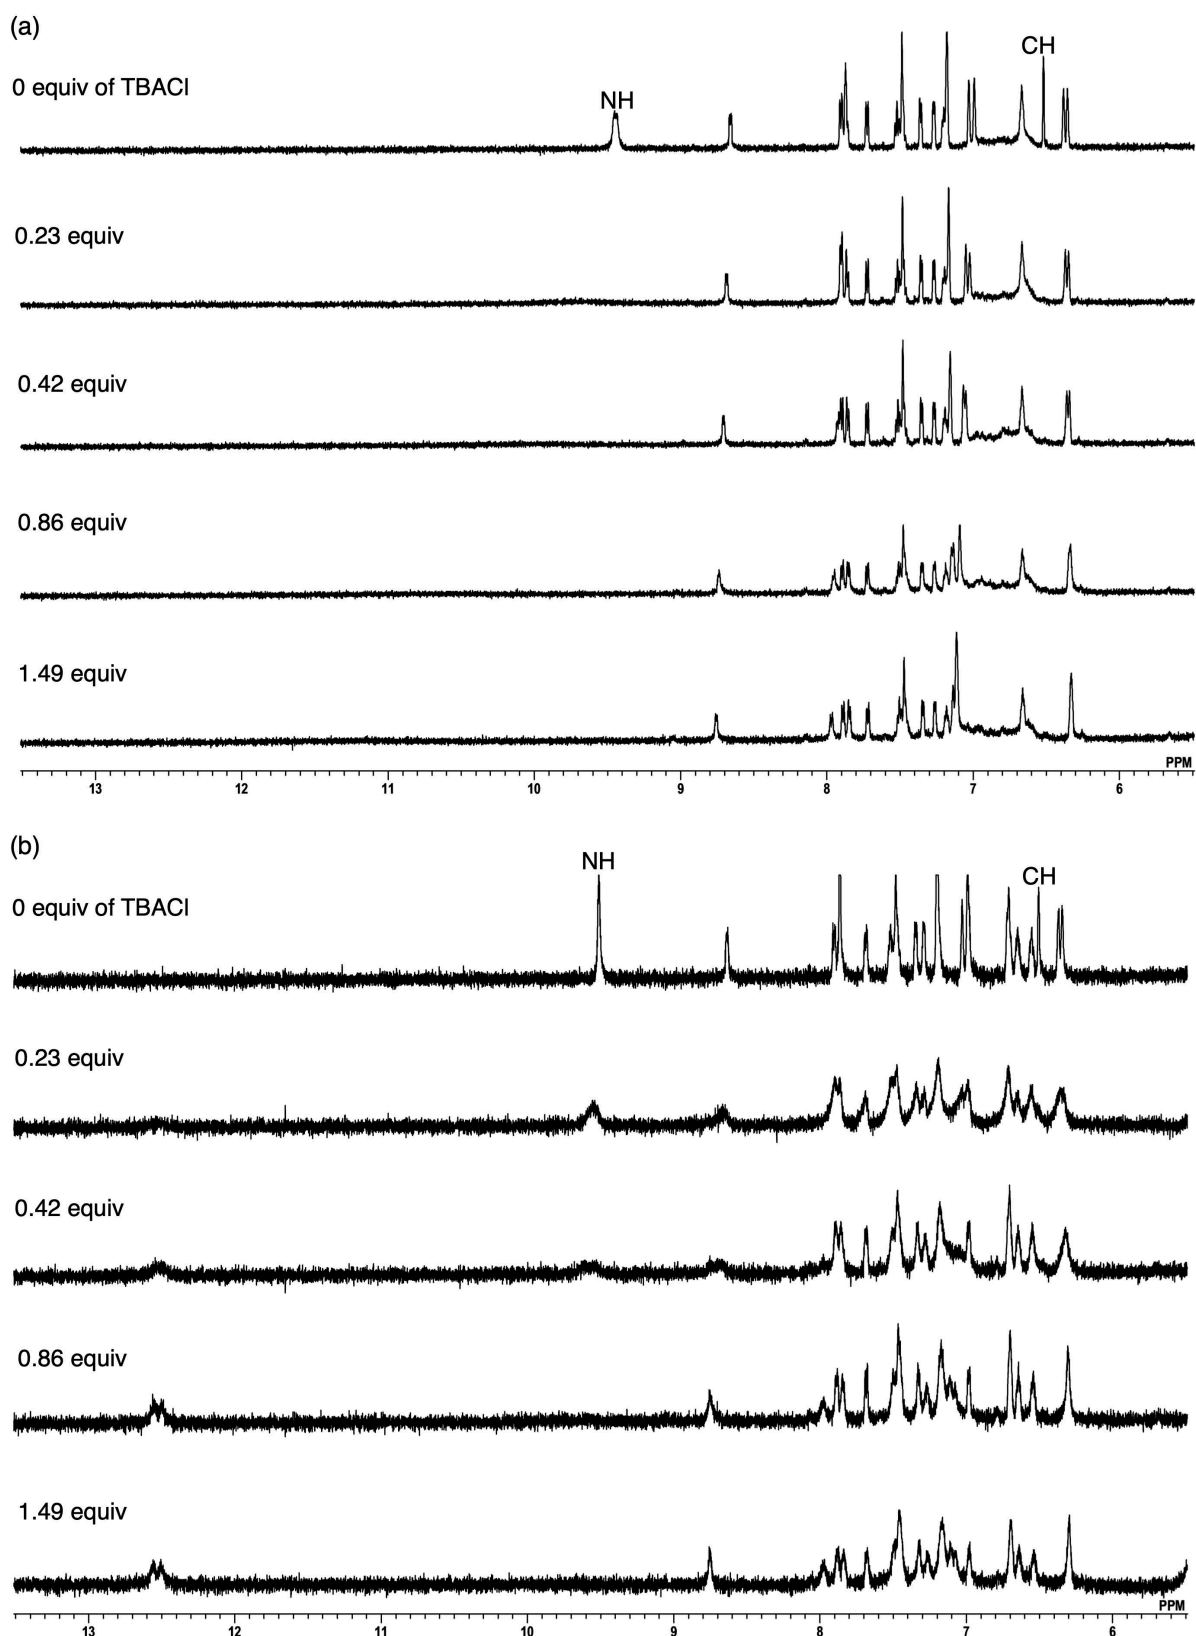

**Fig. S39**  $^1\text{H}$  NMR spectral changes of **3a** ( $1.0 \times 10^{-3}$  M) upon the addition of  $\text{Cl}^-$  (0–1.49 equiv) added as a TBA salt in  $\text{CD}_2\text{Cl}_2$  at (a)  $20^\circ\text{C}$  and (b)  $-50^\circ\text{C}$ . Upon the addition of 1.49 equiv of TBACl at  $-50^\circ\text{C}$ , the signals of pyrrole NH (9.51 ppm) and bridging CH (6.51 ppm) were decreased and new signals were emerged in the downfield region, whose signals were identified as anion-binding pyrrole NH (12.56 and 12.51 ppm) and bridging CH (7.98 ppm). The equilibrium constant ( $K_a$ ) was estimated to be  $2 \times 10^3 \text{ M}^{-1}$  by the integrals of NH signals in the  $^1\text{H}$  NMR spectrum at  $-50^\circ\text{C}$  upon the addition of 0.42 equiv of TBACl.

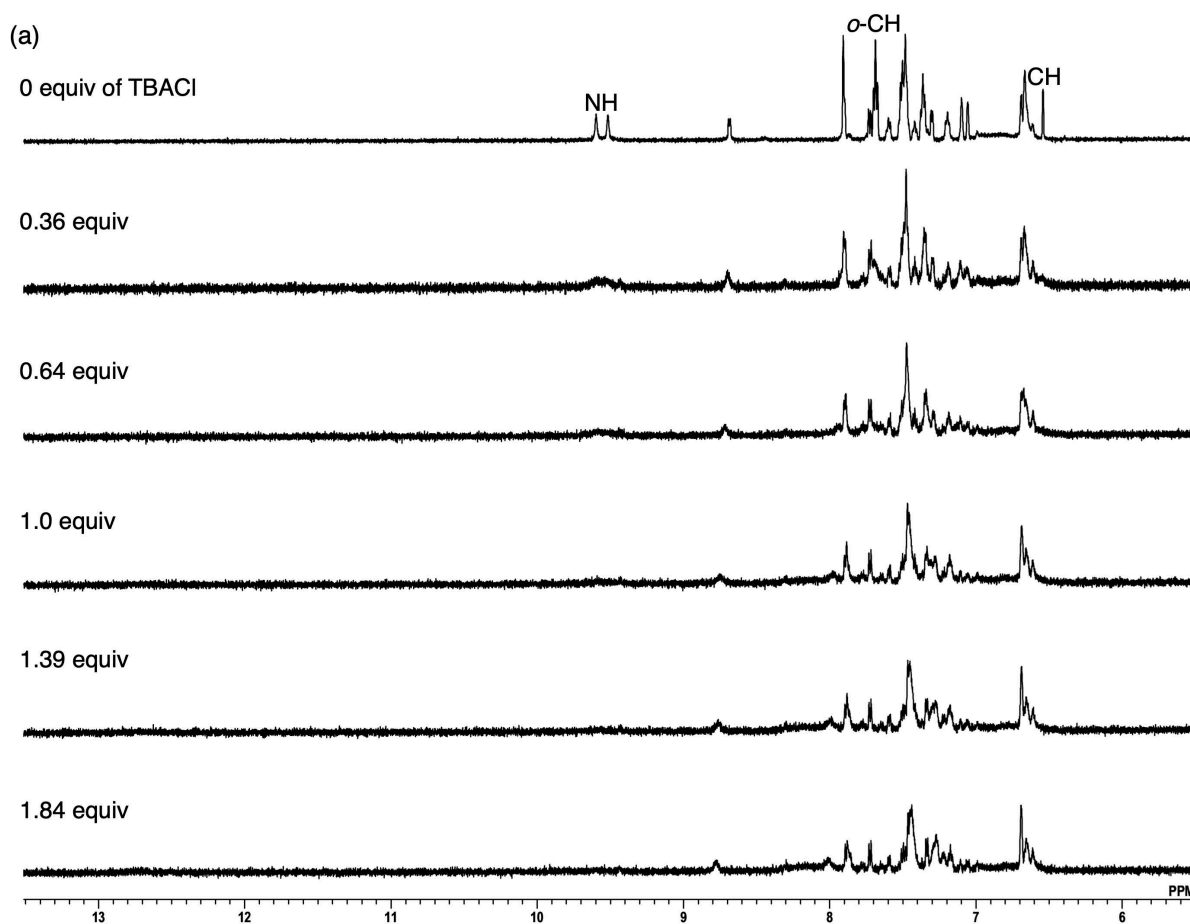

**Fig. S40**  $^1\text{H}$  NMR spectral changes of **3b** ( $1.0 \times 10^{-3}$  M) upon the addition of  $\text{Cl}^-$  (0–1.84 equiv) added as a TBA salt in  $\text{CD}_2\text{Cl}_2$  at (a)  $20\text{ }^\circ\text{C}$  and (b)  $-50\text{ }^\circ\text{C}$ . Upon the addition of 1.84 equiv of TBACl at  $-50\text{ }^\circ\text{C}$ , the signals of pyrrole NH (9.63 and 9.56 ppm), bridging CH (6.51 ppm), and phenyl *o*-CH (7.66 ppm) were decreased and new signals were emerged in the downfield region, whose signals were identified as anion-binding pyrrole NH (12.65 and 12.60 ppm), bridging CH (8.00 ppm), and phenyl *o*-CH (8.22 ppm).

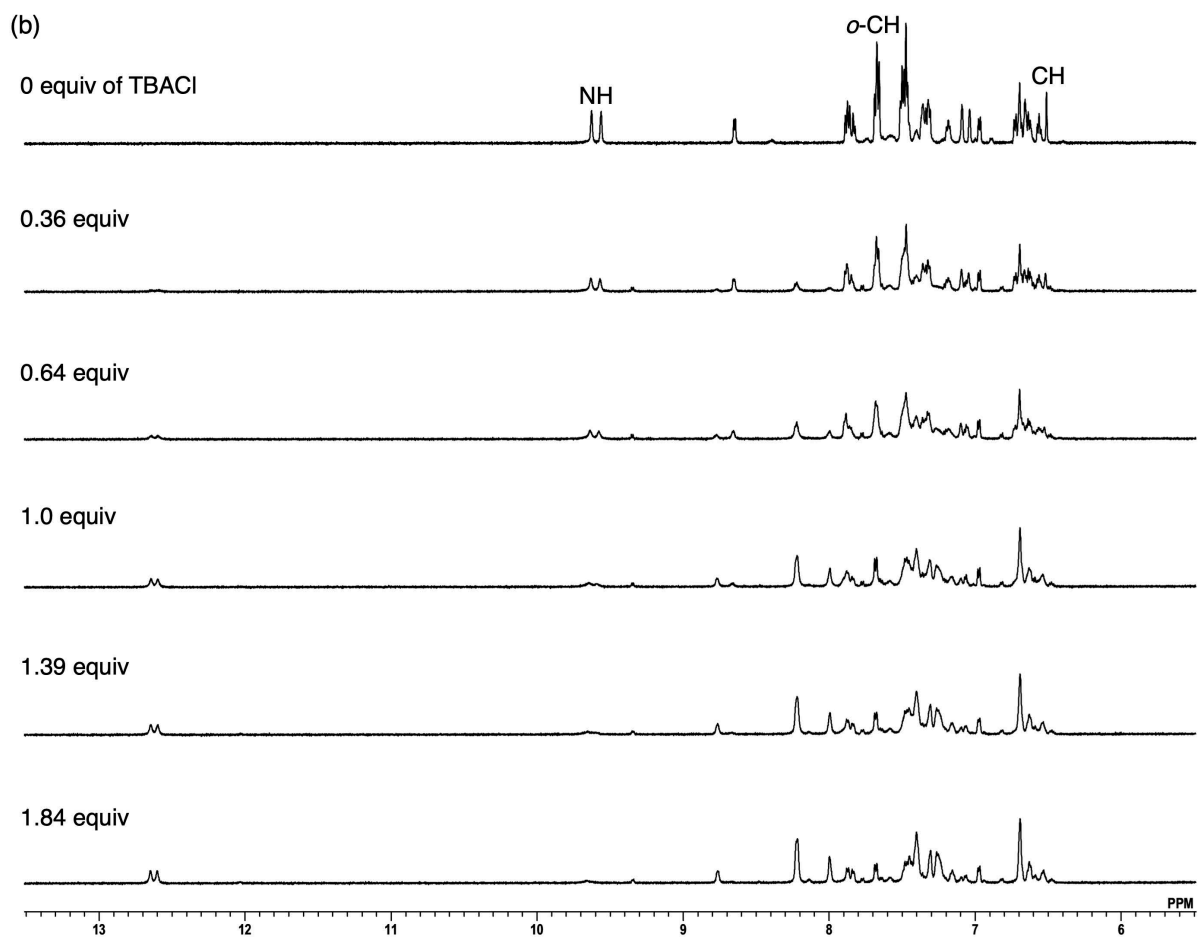

Fig. S40 (Continued)
